# Supplementary material
Source: PubMed Central journal article supplement (PMC4542353)
Supplement: JVI.00263-15_zjv999090746so1.pdf [file JVI.00263-15_zjv999090746so1.pdf]

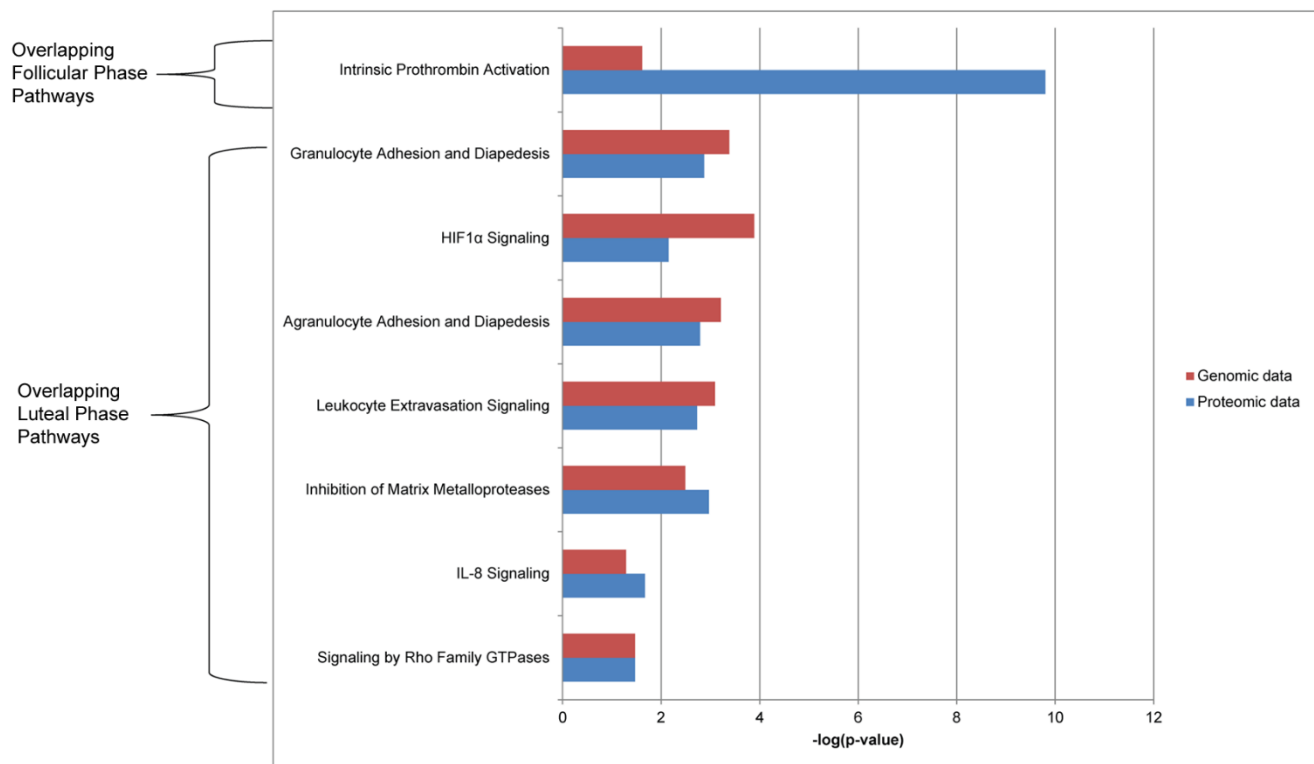

**Supplemental Figure 1.** Biological functions and pathways associated with menstrual cycle phase as determined by both genomic and proteomic analyses. The grouped bar chart represents the side-by-side comparison of overlapping immune-related pathways found to be significantly associated with both the genomic and proteomic data sets. Gene ontology and pathway associations were determined using The Database for Annotation, Visualization and Integrated Discovery (DAVID, v6.7) and Qiagen's Ingenuity Pathway Analysis software. Right-tailed Fisher's Exact Tests were used to calculate the probability that the association between each protein in the data set and the biological function or pathway was random. Significant pathway criteria:  $p < 0.05$  and a minimum of two proteins associated. (Blue = proteomic data, Red = genomic data)

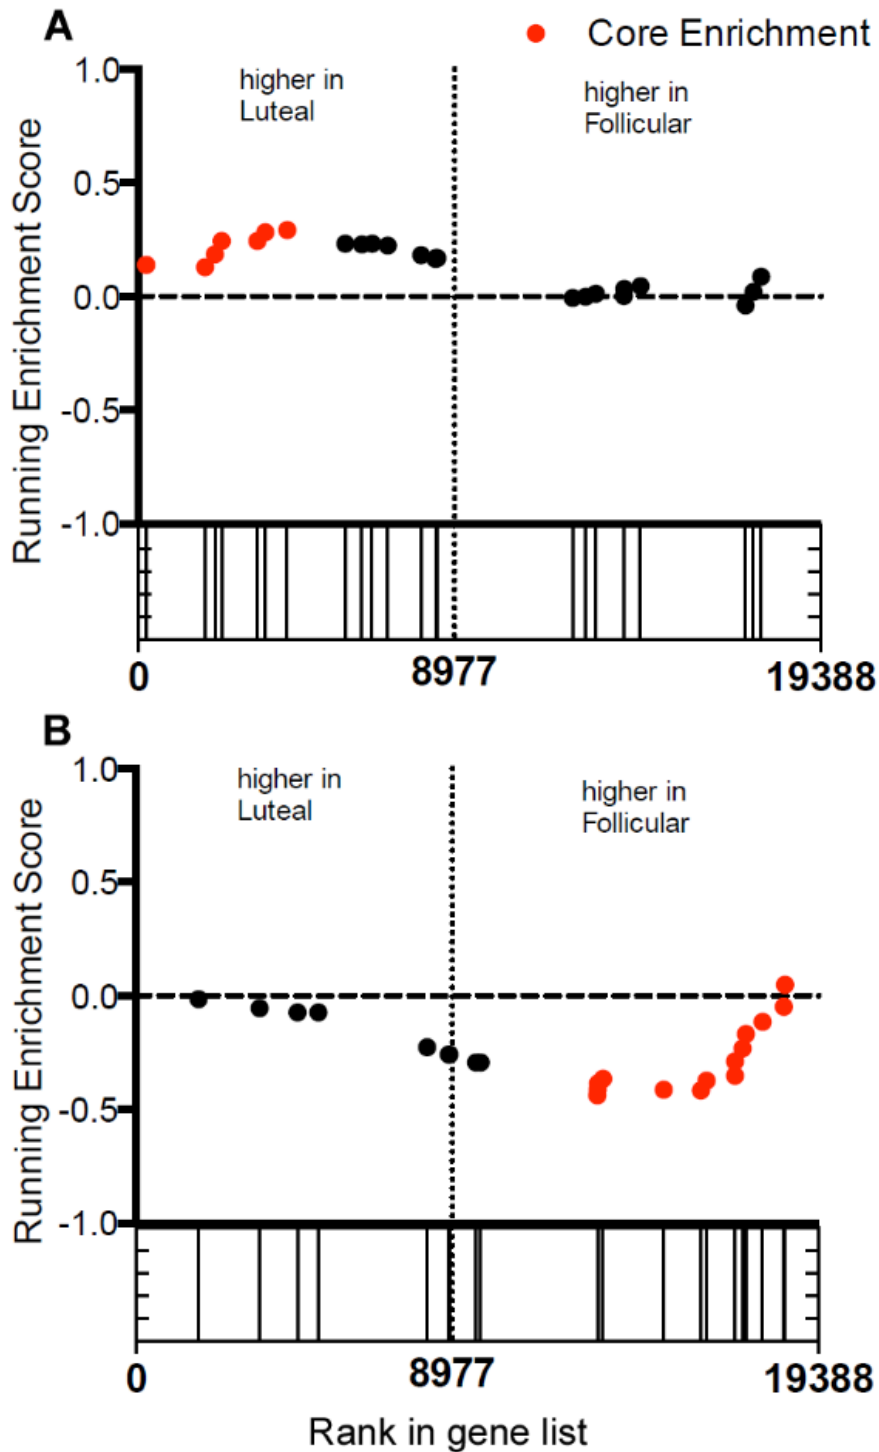

**Supplemental Figure 2.** GSEA plots of proteins differentially expressed (DE) in the luteal (A) and follicular (B) phase, determined by proteomic analyses. To examine the overlap between the gene and protein expression levels, we created corresponding gene sets of the DE proteins enriched in the two phases; we then used GSEA to see if those DE protein gene sets were enriched in either phase in the gene expression data. Gene expression is ranked from luteal to follicular and GSEA determines the distribution of the gene set within that ranking.

**Supplemental Table 1.** Macaque IDs and dates of birth

| <b>No.</b> | <b>Macaque ID</b> | <b>Date of Birth</b> |
|------------|-------------------|----------------------|
| 1          | CN19              | 5/23/2000            |
| 2          | CV85              | 9/20/2000            |
| 3          | FJ26              | 2/27/2001            |
| 4          | DD33              | 3/30/2001            |
| 5          | PHQ1              | 2/11/1999            |
| 6          | PPK1              | 12/10/1996           |
| 7          | PCg1              | 5/19/1995            |
| 8          | 96PO61            | 10/27/1996           |
| 9          | PBm1              | 8/5/1997             |
| 10         | PZm1              | 10/20/1997           |
| 11         | PKg2              | 10/4/2004            |
| 12         | PPy1              | 2001                 |
| 13         | 96pO47            | 9/26/1996            |
| 14         | PDT1              | 2/13/2000            |
| 15         | PKI2              | 8/27/2005            |
| 16         | POH2              | 6/5/2005             |
| 17         | PVI2              | 10/12/2005           |
| 18         | 96P014            | ?*                   |
| 19         | 96P017            | 1/1/2005             |
| 20         | 96P025            | 5/15/1996            |
| 21         | 96P052            | 10/19/1996           |
| 22         | 96P058            | 10/25/1996           |
| 23         | 96P061            | 10/27/1996           |
| 24         | 97P053            | 9/26/1997            |
| 25         | 97P056            | ?*                   |
| 26         | TC4               | 1/1/1991             |
| 27         | TD6               | 12/1/1996            |

\*birthdate unknown.

**Supplemental Table 2.** Genes upregulated in the luteal phase (statistical threshold: at least 1.5 fold change;  $p < 0.05$ )<sup>1</sup> = log<sub>2</sub> ratio (fold change); <sup>2</sup> = fold change luteal phase/follicular phase.

| Probesets               | Gene symbol | p-value | q-value | Log <sub>2</sub> <sup>1</sup> | Fold change <sup>2</sup> |
|-------------------------|-------------|---------|---------|-------------------------------|--------------------------|
| MmugDNA.78.1.S1_at      | ---         | 0.0002  | 0.02427 | 2.692                         | 6.46                     |
| MmugDNA.21514.1.S1_at   | ---         | 0.0001  | 0.02128 | 2.118                         | 4.342                    |
| MmugDNA.24040.1.S1_at   | ---         | 0.00132 | 0.04387 | 2.007                         | 4.019                    |
| MmuSTS.912.1.S1_at      | ---         | 0.001   | 0.03969 | 1.708                         | 3.267                    |
| MmugDNA.24178.1.S1_at   | ---         | 0.00407 | 0.06287 | 1.531                         | 2.891                    |
| MmuSTS.799.1.S1_at      | ---         | 0.0124  | 0.0927  | 1.461                         | 2.754                    |
| MmugDNA.33299.1.S1_at   | ---         | 0.00032 | 0.02708 | 1.299                         | 2.461                    |
| MmugDNA.37382.1.S1_s_at | ---         | 0       | 0.00289 | 1.282                         | 2.431                    |
| MmugDNA.42612.1.S1_at   | ---         | 0.00069 | 0.03444 | 1.278                         | 2.425                    |
| MmuAffx.161.1.S1_at     | ---         | 0       | 0.00459 | 1.254                         | 2.385                    |
| MmugDNA.26374.1.S1_at   | ---         | 0.00174 | 0.04837 | 1.238                         | 2.358                    |
| MmugDNA.20112.1.S1_at   | ---         | 0.0005  | 0.03174 | 1.214                         | 2.32                     |
| MmugDNA.21276.1.S1_at   | ---         | 0.00112 | 0.0417  | 1.173                         | 2.255                    |
| MmugDNA.28048.1.S1_at   | ---         | 0.00119 | 0.04233 | 1.138                         | 2.2                      |
| MmuSTS.442.1.S1_at      | ---         | 0.00188 | 0.0495  | 1.13                          | 2.188                    |
| MmugDNA.42676.1.S1_at   | ---         | 0.00138 | 0.04439 | 1.056                         | 2.08                     |
| MmuSTS.355.1.S1_at      | ---         | 0.01253 | 0.09291 | 1.038                         | 2.053                    |
| MmugDNA.19808.1.S1_at   | ---         | 0.0001  | 0.02128 | 1.01                          | 2.014                    |
| MmunewRS.830.1.S1_at    | ---         | 0.00826 | 0.08035 | 1.009                         | 2.012                    |
| MmugDNA.24059.1.S1_at   | ---         | 0.01432 | 0.09772 | 1.009                         | 2.012                    |
| MmugDNA.43308.1.S1_at   | ---         | 0.00345 | 0.05998 | 0.992                         | 1.989                    |
| MmugDNA.14000.1.S1_at   | ---         | 0.00004 | 0.0173  | 0.984                         | 1.978                    |

|                         |        |         |         |       |       |
|-------------------------|--------|---------|---------|-------|-------|
| MmugDNA.31537.1.S1_at   | ---    | 0.00313 | 0.05803 | 0.972 | 1.962 |
| MmugDNA.34336.1.S1_at   | ---    | 0.00012 | 0.02174 | 0.939 | 1.918 |
| MmuSTS.4436.1.S1_at     | ---    | 0.01225 | 0.09225 | 0.93  | 1.906 |
| MmugDNA.15470.1.S1_at   | ---    | 0.0006  | 0.03328 | 0.903 | 1.869 |
| MmugDNA.7164.1.S1_at    | ---    | 0.00621 | 0.0721  | 0.9   | 1.866 |
| MmugDNA.8941.1.S1_at    | ---    | 0.00154 | 0.0466  | 0.898 | 1.863 |
| MmugDNA.14881.1.S1_at   | ---    | 0.0024  | 0.05304 | 0.892 | 1.856 |
| MmugDNA.10813.1.S1_at   | ---    | 0.00008 | 0.02043 | 0.891 | 1.854 |
| MmuSTS.4301.1.S1_at     | ---    | 0.00012 | 0.02174 | 0.886 | 1.848 |
| MmugDNA.4915.1.S1_at    | ---    | 0.0141  | 0.09713 | 0.868 | 1.825 |
| MmugDNA.41390.1.S1_at   | ---    | 0.0026  | 0.05416 | 0.86  | 1.815 |
| MmunewRS.923.1.S1_at    | ---    | 0.00062 | 0.03338 | 0.86  | 1.815 |
| MmugDNA.31222.1.S1_at   | ---    | 0.00193 | 0.05011 | 0.846 | 1.797 |
| MmugDNA.35626.1.S1_at   | ---    | 0.00165 | 0.04748 | 0.835 | 1.784 |
| MmugDNA.39117.1.S1_at   | ---    | 0.00474 | 0.06616 | 0.82  | 1.766 |
| MmugDNA.33527.1.S1_s_at | ---    | 0.00142 | 0.0449  | 0.815 | 1.759 |
| MmugDNA.20245.1.S1_at   | ---    | 0.00239 | 0.05296 | 0.809 | 1.751 |
| MmugDNA.14738.1.S1_at   | ---    | 0.00007 | 0.01932 | 0.802 | 1.744 |
| Mmu.1530.1.S1_at        | ---    | 0.00308 | 0.05782 | 0.796 | 1.737 |
| MmugDNA.30.1.S1_at      | ---    | 0.00306 | 0.05765 | 0.795 | 1.735 |
| MmugDNA.27738.1.S1_at   | ---    | 0.00039 | 0.02948 | 0.79  | 1.729 |
| MmugDNA.27266.1.S1_at   | KLHL24 | 0.00222 | 0.05182 | 0.796 | 1.736 |
| MmuSTS.743.1.S1_at      | ---    | 0.00799 | 0.07953 | 0.782 | 1.719 |
| MmuSTS.1633.1.S1_at     | ---    | 0.00216 | 0.0515  | 0.773 | 1.709 |
| MmugDNA.8498.1.S1_at    | ---    | 0.00023 | 0.02533 | 0.761 | 1.695 |
| MmugDNA.8563.1.S1_at    | ---    | 0.0002  | 0.02427 | 0.76  | 1.693 |
| MmugDNA.10390.1.S1_at   | ---    | 0.00004 | 0.0173  | 0.759 | 1.693 |
| MmugDNA.31881.1.S1_at   | ---    | 0.00108 | 0.04128 | 0.739 | 1.669 |
| MmugDNA.2024.1.S1_at    | ---    | 0.00533 | 0.06856 | 0.731 | 1.66  |
| MmugDNA.37838.1.S1_at   | ---    | 0.00041 | 0.03009 | 0.728 | 1.656 |
| MmugDNA.3074.1.S1_at    | ---    | 0.00715 | 0.07648 | 0.727 | 1.655 |
| MmuSTS.3964.1.S1_at     | ---    | 0.00006 | 0.01876 | 0.721 | 1.648 |
| MmunewRS.934.1.S1_at    | ---    | 0.00036 | 0.02857 | 0.721 | 1.648 |
| MmugDNA.37541.1.S1_at   | ---    | 0.00399 | 0.06241 | 0.714 | 1.64  |
| MmugDNA.31632.1.S1_at   | ---    | 0.00036 | 0.02863 | 0.71  | 1.636 |
| MmuSTS.993.1.S1_at      | ---    | 0.00517 | 0.06795 | 0.709 | 1.635 |
| MmugDNA.749.1.S1_at     | KLHL24 | 0.00065 | 0.0337  | 0.761 | 1.695 |
| MmugDNA.19147.1.S1_at   | ---    | 0.00831 | 0.08049 | 0.702 | 1.626 |
| MmuSTS.3512.1.S1_at     | ---    | 0.0006  | 0.03328 | 0.698 | 1.623 |
| MmugDNA.18305.1.S1_at   | ---    | 0.00002 | 0.01234 | 0.69  | 1.614 |
| MmugDNA.18428.1.S1_at   | ---    | 0.00127 | 0.04361 | 0.687 | 1.61  |
| MmuSTS.1455.1.S1_at     | ---    | 0.00259 | 0.05416 | 0.685 | 1.608 |
| MmugDNA.41711.1.S1_at   | ---    | 0.00623 | 0.07219 | 0.684 | 1.607 |
| MmugDNA.33190.1.S1_at   | ---    | 0.00012 | 0.02174 | 0.679 | 1.601 |
| MmugDNA.22341.1.S1_at   | ---    | 0.00367 | 0.06085 | 0.668 | 1.589 |
| MmugDNA.27538.1.S1_at   | ---    | 0.00425 | 0.06363 | 0.652 | 1.572 |
| MmugDNA.20758.1.S1_at   | ---    | 0.00603 | 0.07127 | 0.649 | 1.568 |

|                         |                    |         |         |       |       |
|-------------------------|--------------------|---------|---------|-------|-------|
| MmugDNA.28945.1.S1_at   | ---                | 0.0011  | 0.04151 | 0.649 | 1.568 |
| MmugDNA.10626.1.S1_at   | ---                | 0.00984 | 0.08546 | 0.644 | 1.562 |
| MmuSTS.1354.1.S1_at     | ---                | 0.00075 | 0.03513 | 0.641 | 1.56  |
| MmugDNA.499.1.S1_at     | ---                | 0.00187 | 0.04933 | 0.635 | 1.553 |
| MmugDNA.14545.1.S1_at   | ---                | 0.00762 | 0.07818 | 0.635 | 1.553 |
| MmugDNA.35626.1.S1_s_at | ---                | 0.00074 | 0.03513 | 0.624 | 1.541 |
| MmuSTS.943.1.S1_at      | ---                | 0.00222 | 0.05182 | 0.624 | 1.541 |
| MmugDNA.17932.1.S1_at   | ---                | 0.01084 | 0.0884  | 0.621 | 1.538 |
| MmugDNA.3222.1.S1_at    | ---                | 0.0026  | 0.05416 | 0.62  | 1.536 |
| MmugDNA.2942.1.S1_at    | ---                | 0.00009 | 0.02128 | 0.619 | 1.536 |
| MmuSTS.1537.1.S1_at     | ---                | 0.00831 | 0.08049 | 0.617 | 1.534 |
| MmugDNA.26712.1.S1_at   | ---                | 0.00426 | 0.06363 | 0.615 | 1.531 |
| MmugDNA.10752.1.S1_at   | ---                | 0.0026  | 0.05416 | 0.613 | 1.53  |
| Mmu.891.1.S1_at         | ---                | 0.00311 | 0.05799 | 0.612 | 1.528 |
| MmuSTS.1036.1.S1_at     | ---                | 0.00123 | 0.0429  | 0.608 | 1.524 |
| MmugDNA.12195.1.S1_at   | ---                | 0.01137 | 0.08983 | 0.599 | 1.515 |
| MmugDNA.5560.1.S1_at    | ---                | 0.00011 | 0.02128 | 0.596 | 1.511 |
| MmugDNA.39120.1.S1_s_at | ---                | 0.00128 | 0.04361 | 0.596 | 1.511 |
| MmugDNA.19732.1.S1_s_at | ---                | 0.00343 | 0.05978 | 0.595 | 1.511 |
| MmugDNA.13314.1.S1_at   | ---                | 0.00426 | 0.06363 | 0.593 | 1.508 |
| MmugDNA.2946.1.S1_at    | ---                | 0.00227 | 0.05205 | 0.593 | 1.508 |
| MmuSTS.2940.1.S1_at     | ABCA6              | 0.00691 | 0.07551 | 0.602 | 1.518 |
| MmuSTS.2655.1.S1_at     | ABCA8              | 0.00101 | 0.03992 | 1.869 | 3.654 |
| MmugDNA.7507.1.S1_at    | ABCA9              | 0.00039 | 0.02946 | 1.002 | 2.003 |
| MmugDNA.23356.1.S1_at   | ABCA9              | 0.00149 | 0.04574 | 0.921 | 1.894 |
| MmugDNA.25.1.S1_at      | ABHD2              | 0.00028 | 0.02641 | 0.609 | 1.526 |
| MmugDNA.32072.1.S1_at   | ABHD2              | 0.00028 | 0.02652 | 0.594 | 1.51  |
| MmugDNA.31234.1.S1_at   | ABI3BP             | 0.00044 | 0.03075 | 1.175 | 2.258 |
| MmuSTS.3850.1.S1_at     | ABI3BP             | 0.00427 | 0.06375 | 0.645 | 1.564 |
| MmugDNA.7137.1.S1_s_at  | ACSM3              | 0.00248 | 0.05334 | 1.088 | 2.126 |
| MmugDNA.35810.1.S1_at   | ADORA2B            | 0.00003 | 0.01665 | 0.652 | 1.571 |
| MmugDNA.35141.1.S1_at   | AFAP1              | 0.00675 | 0.07501 | 0.599 | 1.515 |
| MmugDNA.9587.1.S1_at    | AKAP1              | 0       | 0.00791 | 0.621 | 1.538 |
| MmuSTS.443.1.S1_at      | AKAP1              | 0       | 0.00791 | 0.618 | 1.535 |
| MmugDNA.24544.1.S1_at   | KLHL24             | 0.00112 | 0.04163 | 0.729 | 1.658 |
| MmuSTS.839.1.S1_at      | KLHL24             | 0.00023 | 0.02554 | 0.7   | 1.625 |
| MmugDNA.4900.1.S1_s_at  | AMY2A ///<br>AMY2B | 0.0049  | 0.06689 | 0.593 | 1.508 |
| MmugDNA.39955.1.S1_at   | ANK3               | 0.00334 | 0.05941 | 0.653 | 1.573 |
| MmugDNA.35189.1.S1_at   | ANTXR1             | 0.00169 | 0.0481  | 0.85  | 1.802 |
| MmugDNA.31898.1.S1_s_at | APOE               | 0.00012 | 0.02174 | 1.115 | 2.165 |
| MmugDNA.17966.1.S1_x_at | APOE               | 0.0005  | 0.03174 | 0.648 | 1.566 |
| MmugDNA.14575.1.S1_at   | ARHGAP42           | 0.00853 | 0.08096 | 0.705 | 1.63  |
| MmugDNA.21971.1.S1_at   | ASAH1              | 0.00059 | 0.03328 | 0.754 | 1.686 |
| MmugDNA.27404.1.S1_at   | BBIP1              | 0.00599 | 0.0711  | 0.591 | 1.506 |
| MmugDNA.27249.1.S1_at   | BEND7              | 0.00064 | 0.0337  | 0.811 | 1.755 |

|                        |                  |         |         |       |       |
|------------------------|------------------|---------|---------|-------|-------|
| MmugDNA.23290.1.S1_at  | BMF              | 0.00421 | 0.06353 | 0.627 | 1.544 |
| MmugDNA.31043.1.S1_at  | CABLES1          | 0.00876 | 0.0818  | 0.751 | 1.683 |
| MmugDNA.23575.1.S1_at  | CACHD1           | 0.00028 | 0.02641 | 0.794 | 1.733 |
| MmuSTS.3280.1.S1_at    | CACNA2D2         | 0.00059 | 0.03328 | 0.599 | 1.515 |
| MmugDNA.15454.1.S1_at  | NKG2D            | 0.00052 | 0.03223 | 0.621 | 1.538 |
| MmugDNA.18138.1.S1_at  | CLDN7            | 0.00923 | 0.08363 | 0.806 | 1.749 |
| MmugDNA.27669.1.S1_at  | CMAH             | 0.01045 | 0.08733 | 0.826 | 1.772 |
| MmugDNA.5086.1.S1_at   | CMBL             | 0.0009  | 0.03865 | 0.588 | 1.503 |
| MmugDNA.22373.1.S1_at  | CPEB1            | 0.00614 | 0.07176 | 0.695 | 1.619 |
| MmugDNA.8405.1.S1_at   | CRISPLD2         | 0.0002  | 0.02435 | 1.949 | 3.861 |
| MmuSTS.3552.1.S1_x_at  | CST1 ///<br>CST2 | 0.00361 | 0.06061 | 1.003 | 2.005 |
| MmuSTS.3552.1.S1_at    | CST2             | 0.01016 | 0.08655 | 1.177 | 2.261 |
| MmugDNA.22170.1.S1_at  | CTHRC1           | 0.01468 | 0.09851 | 1.435 | 2.704 |
| MmuSTS.3973.1.S1_at    | CTSK             | 0.00701 | 0.07596 | 1.141 | 2.206 |
| Mmu.14519.1.S1_at      | CTSK             | 0.00599 | 0.07111 | 1.096 | 2.137 |
| MmuSTS.2298.1.S1_at    | DFNA5            | 0.00129 | 0.04361 | 1.556 | 2.941 |
| MmugDNA.5488.1.S1_at   | DHRS3            | 0.0002  | 0.02427 | 0.885 | 1.846 |
| MmugDNA.37076.1.S1_at  | DPYSL3           | 0.00625 | 0.07231 | 0.89  | 1.853 |
| MmugDNA.38676.1.S1_at  | DSG2             | 0.00501 | 0.06735 | 0.652 | 1.572 |
| MmugDNA.14350.1.S1_at  | ENTPD1           | 0.00001 | 0.01009 | 1.266 | 2.404 |
| MmugDNA.10251.1.S1_at  | ENTPD1           | 0.00006 | 0.01861 | 1.204 | 2.303 |
| MmugDNA.7394.1.S1_s_at | ENTPD1           | 0       | 0.00791 | 0.986 | 1.981 |
| MmuSTS.2870.1.S1_at    | EPCAM            | 0.00099 | 0.03952 | 0.958 | 1.942 |
| MmugDNA.22309.1.S1_at  | EPHB1            | 0.0031  | 0.05794 | 1.268 | 2.409 |
| MmuSTS.910.1.S1_at     | ETNK2            | 0.00233 | 0.05238 | 0.697 | 1.621 |
| MmugDNA.19399.1.S1_at  | FAM113B          | 0.00011 | 0.0215  | 0.706 | 1.631 |
| MmugDNA.9766.1.S1_at   | FAM189A2         | 0.00164 | 0.04741 | 1.001 | 2.001 |
| MmugDNA.28804.1.S1_at  | FAM83A           | 0.00779 | 0.07867 | 1.018 | 2.025 |
| MmugDNA.8327.1.S1_at   | CDKL1            | 0.00275 | 0.05519 | 0.673 | 1.594 |
| MmuSTS.1969.1.S1_at    | LOC717581        | 0.00053 | 0.03224 | 0.757 | 1.69  |
| MmunewRS.702.1.S1_s_at | FOXA1            | 0.00024 | 0.02569 | 1.278 | 2.425 |
| MmugDNA.30579.1.S1_at  | FOXP1            | 0.00006 | 0.01913 | 0.593 | 1.508 |
| MmugDNA.30462.1.S1_at  | MECOM            | 0.00285 | 0.05615 | 0.702 | 1.627 |
| MmugDNA.30464.1.S1_at  | MECOM            | 0.00786 | 0.07909 | 0.657 | 1.577 |
| MmugDNA.9557.1.S1_s_at | GABARAPL<br>1    | 0.00237 | 0.0528  | 0.636 | 1.554 |
| Mmu.3418.2.S1_at       | GABARAPL<br>1    | 0.00952 | 0.08456 | 0.611 | 1.528 |
| MmugDNA.9557.1.S1_at   | GABARAPL<br>1    | 0.00308 | 0.0578  | 0.592 | 1.508 |
| MmuSTS.4815.1.S1_at    | GABRP            | 0.00071 | 0.03483 | 1.874 | 3.665 |
| MmugDNA.7882.1.S1_at   | GALNTL2          | 0.00056 | 0.0331  | 2.274 | 4.836 |
| MmugDNA.32444.1.S1_at  | GALNTL2          | 0.00022 | 0.02533 | 1.468 | 2.766 |
| MmugDNA.41267.1.S1_at  | GAS1             | 0.00617 | 0.07194 | 0.85  | 1.802 |
| MmuSTS.4208.1.S1_at    | GCNT3            | 0.00322 | 0.05868 | 1.303 | 2.467 |

|                         |                  |         |         |       |       |
|-------------------------|------------------|---------|---------|-------|-------|
| MmugDNA.26219.1.S1_at   | RASL11B          | 0.00099 | 0.03952 | 0.736 | 1.666 |
| MmugDNA.29740.1.S1_at   | ---              | 0.00002 | 0.01442 | 0.661 | 1.581 |
| MmuSTS.4834.1.S1_at     | GLI1             | 0.00019 | 0.02427 | 0.592 | 1.507 |
| Mmu.6556.1.S1_at        | GLIPR1           | 0.00794 | 0.0794  | 0.6   | 1.515 |
| MmugDNA.43116.1.S1_at   | GPNMB            | 0.00295 | 0.05686 | 0.73  | 1.659 |
| MmuSTS.2497.1.S1_at     | GPX2             | 0.00013 | 0.0224  | 0.852 | 1.805 |
| MmugDNA.28256.1.S1_at   | GTF2A2           | 0.00055 | 0.03284 | 0.645 | 1.564 |
| MmugDNA.20518.1.S1_at   | HEG1             | 0.00004 | 0.0173  | 0.904 | 1.871 |
| MmugDNA.15362.1.S1_at   | HEG1             | 0.00016 | 0.02405 | 0.795 | 1.736 |
| MmugDNA.20693.1.S1_at   | ---              | 0.00613 | 0.07169 | 1.281 | 2.43  |
| MmugDNA.31936.1.S1_at   | HGF              | 0.00552 | 0.06922 | 0.626 | 1.543 |
| MmugDNA.25181.1.S1_at   | HSD17B6          | 0.0045  | 0.06495 | 0.817 | 1.761 |
| MmuSTS.3908.1.S1_at     | SOX4             | 0.00019 | 0.02427 | 1.1   | 2.143 |
| MmugDNA.2760.1.S1_at    | SOX4             | 0.00028 | 0.02641 | 0.891 | 1.854 |
| MmugDNA.30977.1.S1_at   | SOX4             | 0.00389 | 0.06186 | 0.703 | 1.628 |
| MmugDNA.42471.1.S1_at   | IKZF1            | 0.01002 | 0.08598 | 0.594 | 1.51  |
| MmugDNA.21912.1.S1_at   | SOX9             | 0.00211 | 0.05111 | 1.276 | 2.422 |
| MmugDNA.9085.1.S1_at    | SOX9             | 0.00535 | 0.06861 | 1.152 | 2.223 |
| MmugDNA.33495.1.S1_at   | WDR72            | 0.00044 | 0.03075 | 2.703 | 6.512 |
| MmugDNA.3801.1.S1_at    | WDR72            | 0.00048 | 0.03157 | 2.657 | 6.307 |
| MmugDNA.13969.1.S1_at   | WDR72            | 0.00077 | 0.0356  | 2.541 | 5.819 |
| Mmu.666.1.S1_at         | KCNJ2            | 0.00145 | 0.04534 | 0.734 | 1.663 |
| MmuSTS.1392.1.S1_at     | KCNJ2            | 0.00139 | 0.04442 | 0.663 | 1.583 |
| MmugDNA.21726.1.S1_at   | KIAA1644         | 0.00076 | 0.03539 | 0.957 | 1.941 |
| MmugDNA.18070.1.S1_s_at | KLF9             | 0.00351 | 0.06034 | 0.939 | 1.917 |
| MmugDNA.18070.1.S1_at   | KLF9             | 0.003   | 0.05721 | 0.848 | 1.8   |
| MmugDNA.40625.1.S1_at   | FZD7             | 0.00311 | 0.05799 | 0.76  | 1.694 |
| MmuSTS.4424.1.S1_at     | FZD7             | 0.00186 | 0.04924 | 0.629 | 1.546 |
| MmugDNA.26848.1.S1_s_at | FGFR2            | 0.00876 | 0.0818  | 0.596 | 1.511 |
| MmugDNA.42853.1.S1_at   | FGFR2            | 0.00295 | 0.05688 | 0.592 | 1.507 |
| MmugDNA.10668.1.S1_at   | KLK2 ///<br>KLK3 | 0.00107 | 0.04121 | 1.786 | 3.449 |
| MmugDNA.17170.1.S1_at   | KLK2 ///<br>KLK3 | 0.01336 | 0.09524 | 0.89  | 1.853 |
| MmuSTS.1353.1.S1_at     | KLK2 ///<br>KLK3 | 0.0059  | 0.07069 | 0.645 | 1.564 |
| MmugDNA.5012.1.S1_at    | L3MBTL4          | 0.00313 | 0.05803 | 0.636 | 1.554 |
| MmuSTS.4828.1.S1_at     | GFI1             | 0.00037 | 0.02889 | 0.665 | 1.585 |
| MmuSTS.2537.1.S1_at     | IGFBP3           | 0.01066 | 0.08769 | 0.98  | 1.972 |
| MmugDNA.7729.1.S1_at    | IGFBP3           | 0.01035 | 0.08723 | 0.875 | 1.834 |
| Mmu.11638.2.S1_at       | IGFBP3           | 0.01514 | 0.09976 | 0.865 | 1.821 |
| MmugDNA.5604.1.S1_at    | LOC100130<br>175 | 0.00007 | 0.01996 | 0.831 | 1.779 |
| MmugDNA.4580.1.S1_at    | LOC100130<br>175 | 0.0023  | 0.05225 | 0.64  | 1.558 |
| MmugDNA.19195.1.S1_at   | LOC100425<br>521 | 0.00169 | 0.0481  | 0.586 | 1.501 |



|                         |                                   |         |         |       |       |
|-------------------------|-----------------------------------|---------|---------|-------|-------|
| MmugDNA.20569.1.S1_at   | LOC100428<br>470 ///<br>LOC703527 | 0.00542 | 0.06895 | 0.974 | 1.965 |
| MmuSTS.2641.1.S1_at     | LOC100429<br>735                  | 0.00592 | 0.07079 | 0.791 | 1.73  |
| MmuSTS.4572.1.S1_at     | LOC100430<br>470                  | 0.0003  | 0.02674 | 0.596 | 1.512 |
| MmugDNA.20504.1.S1_at   | LOC100506<br>992                  | 0.00818 | 0.08018 | 0.628 | 1.545 |
| MmugDNA.24630.1.S1_s_at | LOC696059                         | 0.00109 | 0.04136 | 0.601 | 1.517 |
| MmugDNA.28007.1.S1_at   | LOC696781                         | 0.00106 | 0.04097 | 0.638 | 1.557 |
| MmugDNA.38818.1.S1_at   | LOC699977                         | 0.01018 | 0.08659 | 0.749 | 1.68  |
| MmugDNA.35052.1.S1_at   | LOC700181                         | 0.00001 | 0.00903 | 1.486 | 2.8   |
| MmugDNA.35051.1.S1_at   | LOC700181                         | 0.00107 | 0.04121 | 1.06  | 2.085 |
| MmugDNA.38796.1.S1_s_at | LOC700181                         | 0.00195 | 0.0502  | 0.905 | 1.872 |
| Mmu.6559.1.S1_s_at      | LOC701387                         | 0.00926 | 0.08378 | 0.591 | 1.506 |
| MmugDNA.24894.1.S1_at   | LOC703527                         | 0.00679 | 0.07519 | 0.667 | 1.588 |
| MmugDNA.6257.1.S1_at    | LOC706392                         | 0.00003 | 0.01453 | 0.7   | 1.625 |
| MmuSTS.2793.1.S1_at     | LOC706830                         | 0.00009 | 0.02128 | 0.799 | 1.74  |
| MmugDNA.41808.1.S1_at   | LOC707609<br>///<br>LOC708249     | 0.007   | 0.07596 | 0.649 | 1.568 |
| Mmu.9527.1.S1_s_at      | LOC708206                         | 0.00603 | 0.07127 | 1.331 | 2.515 |
| MmugDNA.17081.1.S1_at   | LOC708206                         | 0.00853 | 0.08096 | 0.82  | 1.765 |
| MmugDNA.20455.1.S1_at   | LOC708681                         | 0.00038 | 0.02908 | 0.814 | 1.758 |
| MmugDNA.37113.1.S1_at   | LOC709063                         | 0.00668 | 0.07454 | 1.084 | 2.12  |
| MmugDNA.41992.1.S1_at   | LOC709786                         | 0.00222 | 0.05182 | 1.06  | 2.084 |
| MmugDNA.40627.1.S1_s_at | LOC710234                         | 0.00007 | 0.01972 | 0.59  | 1.505 |
| MmugDNA.29002.1.S1_at   | LOC710290                         | 0.0121  | 0.09186 | 0.678 | 1.6   |
| MmugDNA.27645.1.S1_at   | LOC710801                         | 0.00092 | 0.03865 | 1.791 | 3.46  |
| MmugDNA.30147.1.S1_at   | LOC711075                         | 0.00224 | 0.05187 | 0.646 | 1.565 |
| MmugDNA.40096.1.S1_at   | LOC711299                         | 0.00044 | 0.03075 | 0.783 | 1.72  |

|                         |           |         |         |       |       |
|-------------------------|-----------|---------|---------|-------|-------|
| MmugDNA.39596.1.S1_at   | LOC711796 | 0.00411 | 0.06299 | 0.664 | 1.585 |
| MmuSTS.2263.1.S1_at     | LOC712795 | 0.00361 | 0.06061 | 0.977 | 1.969 |
| MmugDNA.13426.1.S1_at   | LOC712844 | 0.00153 | 0.04655 | 0.62  | 1.537 |
| MmugDNA.27976.1.S1_at   | LOC716250 | 0.008   | 0.07956 | 1.066 | 2.094 |
| MmugDNA.39552.1.S1_at   | LOC716250 | 0.01322 | 0.09493 | 0.747 | 1.678 |
| MmugDNA.21142.1.S1_at   | LTBP1     | 0.01265 | 0.09321 | 0.586 | 1.501 |
| MmugDNA.27968.1.S1_at   | LOC719422 | 0.0034  | 0.05978 | 0.665 | 1.586 |
| MmugDNA.11976.1.S1_s_at | LOC721986 | 0.00034 | 0.02802 | 0.664 | 1.584 |
| MmugDNA.18170.1.S1_at   | LOC90499  | 0.00218 | 0.05168 | 1.222 | 2.333 |
| MmugDNA.14543.1.S1_at   | LRRN1     | 0.00988 | 0.08554 | 1.021 | 2.03  |
| MmugDNA.39168.1.S1_at   | PDGFC     | 0.00031 | 0.02692 | 0.712 | 1.638 |
| MmugDNA.21143.1.S1_at   | MAOA      | 0.00393 | 0.06209 | 0.592 | 1.508 |
| MmugDNA.1162.1.S1_at    | MARCKSL1  | 0.00323 | 0.05868 | 0.697 | 1.621 |
| MmugDNA.37743.1.S1_at   | PDGFC     | 0.00003 | 0.01453 | 0.626 | 1.543 |
| MmugDNA.272.1.S1_at     | HGF       | 0.00312 | 0.05803 | 0.822 | 1.768 |
| MmugDNA.33073.1.S1_at   | MECOM     | 0.0123  | 0.09239 | 0.705 | 1.63  |
| MmuSTS.153.1.S1_at      | MEIS2     | 0.00001 | 0.00903 | 0.989 | 1.984 |
| MmugDNA.20110.1.S1_at   | MERTK     | 0.00086 | 0.03788 | 0.622 | 1.539 |
| MmugDNA.13139.1.S1_at   | MGC42157  | 0.00019 | 0.02427 | 0.67  | 1.591 |
| MmugDNA.41157.1.S1_at   | MGP       | 0.01256 | 0.093   | 0.833 | 1.782 |
| MmugDNA.38667.1.S1_at   | THRB      | 0.00024 | 0.02575 | 0.789 | 1.728 |
| MmugDNA.19730.1.S1_at   | THRB      | 0.00004 | 0.01751 | 0.778 | 1.715 |
| MmuSTS.2880.1.S1_at     | THRB      | 0.00025 | 0.02575 | 0.678 | 1.6   |
| MmugDNA.26441.1.S1_at   | ITGA2     | 0.00605 | 0.0713  | 0.709 | 1.634 |
| MmugDNA.20568.1.S1_s_at | ITGB1     | 0.00506 | 0.06751 | 0.602 | 1.518 |
| MmugDNA.14310.1.S1_at   | ALCAM     | 0.00834 | 0.08053 | 0.907 | 1.875 |
| MmugDNA.29582.1.S1_at   | MRPS12    | 0.00129 | 0.04361 | 0.744 | 1.674 |
| MmugDNA.28501.1.S1_at   | MUM1L1    | 0.00233 | 0.05238 | 1.048 | 2.068 |
| MmugDNA.37873.1.S1_at   | MYLK      | 0.0143  | 0.09772 | 1.129 | 2.187 |
| MmugDNA.4606.1.S1_at    | MYLK-AS1  | 0.00906 | 0.08312 | 0.632 | 1.55  |
| MmugDNA.27879.1.S1_at   | N4BP2L1   | 0.00426 | 0.06363 | 0.627 | 1.544 |
| MmugDNA.36836.1.S1_at   | NFASC     | 0.00316 | 0.05837 | 0.89  | 1.854 |
| MmugDNA.11424.1.S1_at   | NFASC     | 0.00537 | 0.06875 | 0.849 | 1.801 |
| MmugDNA.21308.1.S1_at   | NHS       | 0.00002 | 0.01442 | 0.94  | 1.918 |
| MmugDNA.33592.1.S1_at   | NHS       | 0.0001  | 0.02128 | 0.932 | 1.908 |
| MmugDNA.14309.1.S1_at   | ALCAM     | 0.00831 | 0.08049 | 0.877 | 1.836 |
| MmuSTS.4646.1.S1_at     | NTN4      | 0.00026 | 0.0258  | 1.432 | 2.698 |
| MmugDNA.24910.1.S1_at   | NTRK3     | 0.00011 | 0.0215  | 1.148 | 2.216 |
| MmugDNA.38159.1.S1_at   | NTRK3     | 0.00411 | 0.06299 | 0.751 | 1.682 |
| MmugDNA.17854.1.S1_at   | NTRK3     | 0.00114 | 0.04188 | 0.714 | 1.64  |
| MmugDNA.40533.1.S1_at   | NTRK3     | 0.00535 | 0.06861 | 0.692 | 1.615 |

|                         |                       |         |         |       |       |
|-------------------------|-----------------------|---------|---------|-------|-------|
| MmugDNA.8743.1.S1_at    | NUAK1                 | 0.00059 | 0.03328 | 0.618 | 1.535 |
| MmugDNA.34386.1.S1_at   | OCIAD2                | 0.0064  | 0.07314 | 0.676 | 1.598 |
| Mmu.9771.1.S1_at        | OMD                   | 0.0072  | 0.07662 | 1.086 | 2.124 |
| MmugDNA.17909.1.S1_at   | OMD                   | 0.00499 | 0.06735 | 0.965 | 1.953 |
| MmugDNA.17828.1.S1_at   | OSR1                  | 0.00073 | 0.03506 | 1.312 | 2.483 |
| MmuSTS.2010.1.S1_at     | PCDH20                | 0.00074 | 0.03513 | 0.925 | 1.899 |
| MmugDNA.3319.1.S1_at    | PCED1B-<br>AS1        | 0.0004  | 0.02948 | 0.599 | 1.515 |
| MmugDNA.26477.1.S1_at   | JUN                   | 0.01362 | 0.09572 | 0.618 | 1.535 |
| MmuSTS.684.1.S1_at      | IL7R                  | 0.00762 | 0.07818 | 0.794 | 1.733 |
| MmugDNA.2889.1.S1_at    | PDCD4                 | 0.01185 | 0.0911  | 0.592 | 1.507 |
| MmugDNA.8010.1.S1_at    | IL7R                  | 0.00409 | 0.06296 | 0.782 | 1.719 |
| Mmu.15359.1.S1_s_at     | LEPR                  | 0.00021 | 0.02435 | 1.405 | 2.648 |
| MmugDNA.5926.1.S1_at    | PGM2L1                | 0.00368 | 0.06085 | 0.764 | 1.698 |
| MmugDNA.31648.1.S1_at   | PID1                  | 0.00033 | 0.02745 | 1.054 | 2.077 |
| MmugDNA.25594.1.S1_at   | PIK3C2G               | 0.01217 | 0.09212 | 0.715 | 1.642 |
| MmugDNA.8354.1.S1_at    | PIK3IP1               | 0.00087 | 0.03805 | 0.865 | 1.821 |
| MmugDNA.6732.1.S1_at    | PLXDC1                | 0.01258 | 0.09309 | 0.867 | 1.824 |
| MmugDNA.6770.1.S1_at    | PNMAL1                | 0.00777 | 0.07863 | 0.609 | 1.525 |
| MmuSTS.2392.1.S1_at     | PPP1R1B               | 0.00006 | 0.01913 | 1.52  | 2.868 |
| MmugDNA.24399.1.S1_at   | PTGIS                 | 0.00016 | 0.02375 | 1.803 | 3.49  |
| MmugDNA.13626.1.S1_at   | PTGIS                 | 0.0001  | 0.02128 | 1.51  | 2.848 |
| MmugDNA.4055.1.S1_at    | PTGIS                 | 0.00006 | 0.01861 | 1.21  | 2.313 |
| MmugDNA.12036.1.S1_at   | PTPRC                 | 0.01129 | 0.08967 | 0.643 | 1.561 |
| MmugDNA.43193.1.S1_at   | LEPR                  | 0.00131 | 0.04375 | 1.396 | 2.632 |
| MmugDNA.14519.1.S1_s_at | LEPR                  | 0.0127  | 0.09336 | 1.313 | 2.485 |
| Mmu.5677.4.S1_at        | LEPR                  | 0.00284 | 0.05614 | 1.241 | 2.364 |
| MmuSTS.1298.1.S1_at     | RBM20                 | 0.00003 | 0.01545 | 1.472 | 2.773 |
| MmuSTS.1748.1.S1_at     | RNF152                | 0.00017 | 0.02427 | 1.047 | 2.066 |
| MmugDNA.24334.1.S1_at   | RNF207                | 0.00085 | 0.03741 | 0.64  | 1.558 |
| MmugDNA.11064.1.S1_at   | ROGDI                 | 0.00001 | 0.00833 | 0.62  | 1.537 |
| MmuSTS.2360.1.S1_at     | S100A1                | 0.00005 | 0.0186  | 1.131 | 2.19  |
| MmugDNA.16098.1.S1_at   | SCML4                 | 0.00024 | 0.02569 | 0.688 | 1.611 |
| MmugDNA.39706.1.S1_at   | SCML4                 | 0.00706 | 0.07627 | 0.593 | 1.508 |
| MmugDNA.37863.1.S1_at   | SCN2A                 | 0.00791 | 0.07928 | 0.886 | 1.848 |
| MmuSTS.3217.1.S1_at     | SDC4                  | 0.00021 | 0.02435 | 0.599 | 1.514 |
| MmugDNA.5004.1.S1_at    | SEMA5A                | 0.00005 | 0.01849 | 0.866 | 1.823 |
| MmugDNA.40631.1.S1_at   | SEMA5A                | 0.00002 | 0.01442 | 0.864 | 1.82  |
| MmugDNA.20442.1.S1_at   | SEMA6A                | 0.00189 | 0.04959 | 0.829 | 1.776 |
| MmugDNA.31438.1.S1_at   | SEPP1                 | 0.00595 | 0.07092 | 0.723 | 1.65  |
| MmugDNA.33316.1.S1_at   | SEPP1                 | 0.00288 | 0.05633 | 0.634 | 1.552 |
| MmugDNA.18538.1.S1_s_at | SERPINI1              | 0.00054 | 0.03275 | 0.697 | 1.621 |
| MmugDNA.42149.1.S1_at   | SESTD1                | 0.0042  | 0.06346 | 0.647 | 1.566 |
| MmugDNA.22148.1.S1_at   | SH2D1B                | 0.00016 | 0.02375 | 0.612 | 1.529 |
| MmugDNA.11746.1.S1_at   | SLC12A8<br>/// ZNF148 | 0       | 0.00258 | 1.532 | 2.891 |

|                         |                   |         |         |       |       |
|-------------------------|-------------------|---------|---------|-------|-------|
| MmuSTS.4379.1.S1_at     | SLC16A7           | 0.00095 | 0.03937 | 0.666 | 1.587 |
| MmugDNA.43364.1.S1_at   | SLC16A7           | 0.00221 | 0.05182 | 0.618 | 1.534 |
| MmuSTS.2805.1.S1_at     | SLC35F3           | 0.00001 | 0.00993 | 0.833 | 1.781 |
| MmugDNA.24421.1.S1_at   | TET1              | 0.00054 | 0.03275 | 0.647 | 1.566 |
| MmugDNA.30184.1.S1_at   | MMP14             | 0.00569 | 0.07002 | 0.769 | 1.704 |
| MmuSTS.1507.1.S1_at     | MMP14             | 0.00572 | 0.07011 | 0.685 | 1.607 |
| MmuSTS.1520.1.S1_at     | MMP2              | 0.00154 | 0.0466  | 1.257 | 2.39  |
| MmuSTS.2992.1.S1_at     | MMP28             | 0.00001 | 0.00898 | 1.477 | 2.785 |
| MmugDNA.385.1.S1_at     | SP4               | 0.00202 | 0.05062 | 0.705 | 1.631 |
| MmugDNA.34917.1.S1_at   | SPHKAP            | 0.00042 | 0.03022 | 1.954 | 3.873 |
| MmugDNA.21602.1.S1_at   | SPSB1             | 0.0134  | 0.09527 | 0.626 | 1.544 |
| MmugDNA.39545.1.S1_at   | ST6GALNAC<br>2    | 0.00012 | 0.02174 | 0.764 | 1.698 |
| MmugDNA.37336.1.S1_at   | STMN2             | 0.00385 | 0.06178 | 1.524 | 2.876 |
| MmugDNA.24738.1.S1_at   | STMN2             | 0.01153 | 0.09023 | 1.276 | 2.421 |
| MmugDNA.40984.1.S1_at   | STON1             | 0.00022 | 0.02488 | 0.974 | 1.965 |
| MmugDNA.9563.1.S1_at    | STON1-<br>GTF2A1L | 0.00063 | 0.03338 | 0.701 | 1.626 |
| MmugDNA.24916.1.S1_at   | SVOPL             | 0.01296 | 0.09407 | 0.72  | 1.647 |
| MmugDNA.6916.1.S1_at    | MMP28             | 0.00026 | 0.02575 | 0.97  | 1.959 |
| MmugDNA.41431.1.S1_at   | TFCP2L1           | 0.00041 | 0.03002 | 1.677 | 3.197 |
| MmugDNA.13892.1.S1_at   | TFCP2L1           | 0.00139 | 0.04439 | 1.438 | 2.71  |
| MmugDNA.22230.1.S1_s_at | MMP28             | 0.00054 | 0.03275 | 0.686 | 1.608 |
| MmugDNA.17550.1.S1_at   | RARB              | 0       | 0.00258 | 1.675 | 3.194 |
| MmuSTS.3105.1.S1_at     | RARB              | 0       | 0.00258 | 1.497 | 2.822 |
| Mmu.10451.1.S1_at       | GDF6              | 0.00002 | 0.01234 | 0.747 | 1.678 |
| MmugDNA.5095.1.S1_at    | TGIF1             | 0.00182 | 0.04902 | 0.591 | 1.507 |
| MmuSTS.3996.1.S1_s_at   | TGFB2             | 0.00115 | 0.042   | 0.928 | 1.903 |
| MmugDNA.5059.1.S1_at    | TGFB2             | 0.0025  | 0.05355 | 0.843 | 1.794 |
| MmugDNA.25731.1.S1_at   | TGFB2             | 0.01114 | 0.0893  | 0.806 | 1.749 |
| MmugDNA.19950.1.S1_at   | THSD7A            | 0.00966 | 0.08508 | 0.959 | 1.944 |
| MmugDNA.36279.1.S1_at   | TINAGL1           | 0.00166 | 0.04758 | 0.8   | 1.741 |
| MmugDNA.19488.1.S1_at   | TMEM30B           | 0.00034 | 0.02801 | 0.753 | 1.685 |
| MmugDNA.5830.1.S1_at    | TMOD1             | 0.00904 | 0.08312 | 0.589 | 1.504 |
| MmugDNA.29242.1.S1_at   | ZNF337            | 0.00018 | 0.02427 | 1.073 | 2.104 |
| MmugDNA.5333.1.S1_at    | TNIK              | 0.00006 | 0.01917 | 1.071 | 2.101 |
| Mmu.12187.1.S1_at       | TNIK              | 0.0003  | 0.02674 | 0.862 | 1.818 |
| MmugDNA.14737.1.S1_at   | TNIK              | 0       | 0.00791 | 0.707 | 1.633 |
| MmugDNA.28110.1.S1_at   | TNIK              | 0.00051 | 0.03204 | 0.695 | 1.619 |
| MmugDNA.14964.1.S1_at   | TOX2              | 0.0007  | 0.03459 | 0.613 | 1.53  |
| MmugDNA.31842.1.S1_s_at | TOX3              | 0.00465 | 0.06603 | 0.844 | 1.795 |
| MmugDNA.10743.1.S1_at   | TSC22D3           | 0.0007  | 0.03444 | 0.672 | 1.594 |
| MmugDNA.18490.1.S1_at   | TSPAN18           | 0.00163 | 0.04741 | 0.659 | 1.579 |
| MmugDNA.37942.1.S1_at   | TSPAN18           | 0.00221 | 0.05182 | 0.643 | 1.561 |
| MmugDNA.6931.1.S1_at    | TSPAN8            | 0.00663 | 0.07434 | 0.716 | 1.643 |
| MmugDNA.36621.1.S1_s_at | TTR               | 0.00641 | 0.07317 | 0.902 | 1.868 |
| Mmu.7507.2.S1_at        | TXNIP             | 0.00045 | 0.03075 | 0.696 | 1.62  |

|                         |        |         |         |       |       |
|-------------------------|--------|---------|---------|-------|-------|
| MmugDNA.31894.1.S1_at   | TXNIP  | 0.00032 | 0.02708 | 0.677 | 1.599 |
| MmugDNA.31897.1.S1_at   | TXNIP  | 0.00062 | 0.03338 | 0.672 | 1.594 |
| MmugDNA.31894.1.S1_s_at | TXNIP  | 0.00121 | 0.04267 | 0.64  | 1.558 |
| MmugDNA.22231.1.S1_at   | UPK1A  | 0.01133 | 0.08977 | 0.767 | 1.702 |
| MmugDNA.42675.1.S1_at   | TGFB2  | 0.00969 | 0.08513 | 0.801 | 1.742 |
| MmugDNA.18411.1.S1_at   | PDCD4  | 0.00001 | 0.00883 | 0.701 | 1.625 |
| MmuSTS.2020.1.S1_at     | PDCD4  | 0.00006 | 0.01861 | 0.725 | 1.653 |
| MmugDNA.12230.1.S1_at   | XPR1   | 0.00753 | 0.0778  | 0.724 | 1.652 |
| MmugDNA.40688.1.S1_at   | ZNF235 | 0.00114 | 0.04188 | 0.593 | 1.508 |

**Supplemental Table 3.** Genes upregulated in the follicular phase (statistical threshold: at least 1.5 fold change;  $p < 0.05$ )<sup>1</sup> = log<sub>2</sub> ratio (fold change); <sup>2</sup> = fold change luteal phase/follicular phase.

| Probesets              | Gene symbol | p-value  | q-value | Log <sub>2</sub> <sup>1</sup> | Fold change <sup>2</sup> |
|------------------------|-------------|----------|---------|-------------------------------|--------------------------|
| MmugDNA.16407.1.S1_at  | LOC696983   | 1.75E-07 | 0.00258 | -3.438                        | -10.838                  |
| MmugDNA.32362.1.S1_at  | MAFB        | 8.17E-06 | 0.00913 | -0.754                        | -1.687                   |
| MmuSTS.1980.1.S1_at    | ODZ1        | 1.46E-05 | 0.01234 | -0.921                        | -1.893                   |
| MmugDNA.18066.1.S1_at  | MGC16121    | 1.96E-05 | 0.0136  | -2.566                        | -5.922                   |
| MmugDNA.3203.1.S1_at   | STC1        | 2.47E-05 | 0.01442 | -2.648                        | -6.267                   |
| MmugDNA.4421.1.S1_at   | LOC712578   | 3.15E-05 | 0.01634 | -0.828                        | -1.776                   |
| MmugDNA.22693.1.S1_at  | VEGFA       | 3.73E-05 | 0.0173  | -1.148                        | -2.215                   |
| MmugDNA.8918.1.S1_at   | LOC717872   | 4.37E-05 | 0.01751 | -1.941                        | -3.841                   |
| MmugDNA.16154.1.S1_at  | LOC711305   | 5.74E-05 | 0.01861 | -0.736                        | -1.665                   |
| MmugDNA.5017.1.S1_s_at | MSX2        | 5.49E-05 | 0.01861 | -1.059                        | -2.083                   |
| MmunewRS.99.1.S1_at    | LOC698299   | 6.17E-05 | 0.01913 | -1.239                        | -2.36                    |
| MmuSTS.3598.1.S1_s_at  | CSPG5       | 7.32E-05 | 0.01996 | -0.85                         | -1.802                   |
| MmugDNA.4494.1.S1_at   | PTGS2       | 7.35E-05 | 0.01996 | -0.715                        | -1.641                   |
| MmugDNA.3345.1.S1_at   | VEGFA       | 7.37E-05 | 0.01996 | -0.986                        | -1.98                    |
| MmugDNA.43564.1.S1_at  | GABRQ       | 7.70E-05 | 0.02044 | -1.31                         | -2.479                   |
| MmuSTS.3842.1.S1_at    | ---         | 8.05E-05 | 0.02053 | -3.263                        | -9.599                   |
| MmuSTS.1547.1.S1_s_at  | MSX2        | 8.08E-05 | 0.02053 | -0.806                        | -1.748                   |
| MmugDNA.5232.1.S1_at   | ---         | 8.70E-05 | 0.02123 | -1.405                        | -2.648                   |
| MmugDNA.17457.1.S1_at  | ---         | 1.02E-04 | 0.02128 | -1.258                        | -2.392                   |
| MmugDNA.36848.1.S1_at  | TFPI2       | 9.67E-05 | 0.02128 | -2.561                        | -5.903                   |
| MmugDNA.20407.1.S1_at  | VEGFA       | 1.03E-04 | 0.02128 | -1.145                        | -2.212                   |

|                       |                        |          |         |        |        |
|-----------------------|------------------------|----------|---------|--------|--------|
| MmugDNA.36983.1.S1_at | DIO3                   | 1.11E-04 | 0.0215  | -1.591 | -3.013 |
| MmunewRS.70.1.S1_at   | DEFB1                  | 1.13E-04 | 0.02162 | -1.021 | -2.03  |
| MmugDNA.3785.1.S1_at  | LOC708556              | 1.18E-04 | 0.02174 | -0.943 | -1.923 |
| MmuSTS.109.1.S1_at    | ASNS                   | 1.37E-04 | 0.02281 | -0.733 | -1.662 |
| MmuSTS.137.1.S1_at    | 5-Sep                  | 1.53E-04 | 0.02317 | -0.619 | -1.535 |
| MmugDNA.41470.1.S1_at | ---                    | 1.92E-04 | 0.02427 | -0.679 | -1.601 |
| MmugDNA.13721.1.S1_at | ---                    | 1.94E-04 | 0.02427 | -0.923 | -1.896 |
| MmugDNA.5710.1.S1_at  | FAM59A                 | 2.01E-04 | 0.02427 | -0.612 | -1.528 |
| MmugDNA.11919.1.S1_at | MSX2                   | 1.71E-04 | 0.02427 | -0.691 | -1.614 |
| MmugDNA.5017.1.S1_at  | MSX2                   | 1.84E-04 | 0.02427 | -0.913 | -1.883 |
| MmugDNA.34495.1.S1_at | STC1                   | 1.91E-04 | 0.02427 | -2.233 | -4.7   |
| MmugDNA.30303.1.S1_at | TMEM120B               | 1.89E-04 | 0.02427 | -0.796 | -1.737 |
| MmugDNA.36227.1.S1_at | MGC16121 ///<br>MIR503 | 2.37E-04 | 0.02569 | -1.194 | -2.287 |
| MmuSTS.4699.1.S1_at   | VEGFA                  | 2.34E-04 | 0.02569 | -0.807 | -1.749 |
| MmuSTS.3368.1.S1_at   | LOC722330              | 2.46E-04 | 0.02575 | -0.631 | -1.549 |
| MmugDNA.36784.1.S1_at | ZNF711                 | 2.53E-04 | 0.02575 | -0.653 | -1.572 |
| MmugDNA.21291.1.S1_at | ---                    | 2.63E-04 | 0.02597 | -0.918 | -1.89  |
| MmugDNA.20037.1.S1_at | SRPX2                  | 2.84E-04 | 0.02652 | -1.723 | -3.302 |
| MmugDNA.26953.1.S1_at | ---                    | 2.97E-04 | 0.02669 | -0.745 | -1.676 |
| MmugDNA.22655.1.S1_at | ACAP3                  | 2.97E-04 | 0.02669 | -0.615 | -1.531 |
| MmugDNA.27403.1.S1_at | SELE                   | 3.07E-04 | 0.02689 | -0.983 | -1.977 |
| Mmu.12129.1.S1_at     | ---                    | 3.11E-04 | 0.02692 | -0.72  | -1.647 |
| MmuSTS.4796.1.S1_at   | FMO4                   | 3.38E-04 | 0.02796 | -0.691 | -1.615 |
| MmugDNA.37995.1.S1_at | NDRG1                  | 3.55E-04 | 0.02857 | -0.694 | -1.618 |
| MmugDNA.332.1.S1_at   | ---                    | 3.61E-04 | 0.02866 | -0.742 | -1.672 |
| MmugDNA.2249.1.S1_at  | LOC721400              | 3.64E-04 | 0.02879 | -0.941 | -1.92  |
| MmuSTS.1939.1.S1_at   | FGF11                  | 4.04E-04 | 0.02982 | -0.957 | -1.942 |
| MmugDNA.14659.1.S1_at | ESM1                   | 4.17E-04 | 0.03022 | -1.121 | -2.174 |
| MmugDNA.10788.1.S1_at | LOC704750              | 4.19E-04 | 0.03022 | -0.842 | -1.792 |
| MmugDNA.5657.1.S1_at  | DIO2                   | 4.49E-04 | 0.03075 | -1.637 | -3.109 |
| MmugDNA.5976.1.S1_at  | LOC717646              | 4.39E-04 | 0.03075 | -0.768 | -1.703 |
| Mmu.12651.3.S1_at     | TFPI2                  | 4.66E-04 | 0.03126 | -2.242 | -4.73  |
| MmugDNA.13486.1.S1_at | LOC703270              | 4.73E-04 | 0.03139 | -1.728 | -3.314 |
| MmugDNA.4044.1.S1_at  | THBS1                  | 4.77E-04 | 0.0315  | -0.741 | -1.671 |
| MmugDNA.30040.1.S1_at | CPXM2                  | 4.83E-04 | 0.03157 | -0.651 | -1.57  |
| MmugDNA.9830.1.S1_at  | LOC717945              | 4.88E-04 | 0.03161 | -1.511 | -2.851 |
| MmuSTS.4004.1.S1_at   | THBS1                  | 4.94E-04 | 0.03174 | -1.188 | -2.278 |
| MmugDNA.17516.1.S1_at | SRPX2                  | 5.19E-04 | 0.0322  | -1.291 | -2.447 |
| MmuSTS.2696.1.S1_at   | DIO2                   | 5.28E-04 | 0.03224 | -1.693 | -3.233 |
| MmuSTS.1486.1.S1_at   | HK2                    | 5.76E-04 | 0.03321 | -1.595 | -3.021 |
| MmugDNA.11096.1.S1_at | ADAMTS17               | 5.80E-04 | 0.03324 | -0.633 | -1.551 |
| MmugDNA.36333.1.S1_at | ADAMTS9-AS1            | 5.95E-04 | 0.03328 | -0.991 | -1.988 |
| MmugDNA.8315.1.S1_at  | DIO2                   | 6.08E-04 | 0.03328 | -1.672 | -3.187 |
| MmugDNA.14725.1.S1_at | CSMD2                  | 6.28E-04 | 0.03338 | -0.668 | -1.589 |
| MmugDNA.38053.1.S1_at | TFPI2                  | 6.26E-04 | 0.03338 | -2.061 | -4.174 |
| MmugDNA.563.1.S1_at   | ---                    | 6.48E-04 | 0.0337  | -0.89  | -1.853 |

|                         |                                          |          |         |        |        |
|-------------------------|------------------------------------------|----------|---------|--------|--------|
| MmugDNA.21658.1.S1_at   | FGF11                                    | 6.46E-04 | 0.0337  | -0.638 | -1.556 |
| MmugDNA.5129.1.S1_at    | GADD45G                                  | 6.45E-04 | 0.0337  | -0.787 | -1.726 |
| MmugDNA.24380.1.S1_at   | LOC100423631<br>/// VCAN                 | 6.50E-04 | 0.03373 | -1.205 | -2.305 |
| MmugDNA.11703.1.S1_at   | DIO2                                     | 6.67E-04 | 0.034   | -1.586 | -3.003 |
| MmuSTS.628.1.S1_at      | ---                                      | 6.72E-04 | 0.03402 | -2.213 | -4.637 |
| MmuSTS.869.1.S1_at      | DYSF                                     | 6.76E-04 | 0.03415 | -0.665 | -1.585 |
| MmugDNA.18610.1.S1_at   | MIR210HG                                 | 6.94E-04 | 0.03444 | -1.112 | -2.161 |
| MmugDNA.11706.1.S1_at   | DIO2                                     | 7.06E-04 | 0.03465 | -1.253 | -2.384 |
| MmugDNA.18804.1.S1_at   | ASTN2                                    | 7.17E-04 | 0.03492 | -0.998 | -1.997 |
| MmugDNA.14736.1.S1_at   | ADAMTS9                                  | 7.26E-04 | 0.03506 | -0.65  | -1.569 |
| MmugDNA.33986.1.S1_at   | SLIT2-IT1                                | 7.37E-04 | 0.03506 | -0.738 | -1.668 |
| MmugDNA.327.1.S1_at     | ---                                      | 7.52E-04 | 0.03513 | -0.659 | -1.579 |
| MmugDNA.11408.1.S1_at   | SVEP1                                    | 7.55E-04 | 0.03518 | -1.381 | -2.605 |
| MmugDNA.27359.1.S1_at   | CDH11                                    | 7.84E-04 | 0.03581 | -0.893 | -1.857 |
| MmugDNA.821.1.S1_at     | KATNAL2                                  | 7.92E-04 | 0.03599 | -1.37  | -2.585 |
| MmugDNA.18146.1.S1_at   | ---                                      | 8.11E-04 | 0.03638 | -0.589 | -1.504 |
| MmugDNA.27171.1.S1_x_at | HIST1H2BB                                | 8.77E-04 | 0.03805 | -1.061 | -2.087 |
| MmugDNA.24921.1.S1_at   | ---                                      | 9.17E-04 | 0.03865 | -0.904 | -1.872 |
| MmugDNA.28344.1.S1_s_at | LOC703270                                | 9.00E-04 | 0.03865 | -1.592 | -3.015 |
| MmuSTS.1876.1.S1_at     | LOC716986                                | 9.29E-04 | 0.03894 | -0.71  | -1.636 |
| MmugDNA.24420.1.S1_at   | LOC719468                                | 9.37E-04 | 0.03907 | -0.647 | -1.566 |
| MmugDNA.3990.1.S1_at    | SFN                                      | 9.54E-04 | 0.03937 | -0.743 | -1.674 |
| MmugDNA.15621.1.S1_at   | LOC697171                                | 9.62E-04 | 0.03947 | -1.353 | -2.554 |
| MmuSTS.1506.1.S1_at     | MMP11                                    | 9.74E-04 | 0.03952 | -1.192 | -2.284 |
| MmugDNA.37112.1.S1_at   | ZNF330                                   | 9.88E-04 | 0.03952 | -0.661 | -1.581 |
| MmugDNA.11432.1.S1_at   | ADAM12                                   | 9.99E-04 | 0.03969 | -1.625 | -3.085 |
| MmugDNA.31550.1.S1_at   | ---                                      | 1.04E-03 | 0.04064 | -0.6   | -1.516 |
| MmugDNA.18357.1.S1_at   | ORC6L                                    | 1.09E-03 | 0.04132 | -0.595 | -1.51  |
| Mmu.13746.1.S1_at       | CCL25                                    | 1.10E-03 | 0.04139 | -1.173 | -2.254 |
| MmugDNA.9862.1.S1_at    | PPP1R3B                                  | 1.11E-03 | 0.04163 | -0.661 | -1.581 |
| MmugDNA.27171.1.S1_at   | HIST1H2BB                                | 1.16E-03 | 0.042   | -1.12  | -2.173 |
| MmugDNA.4985.1.S1_at    | LOC708451                                | 1.16E-03 | 0.04201 | -0.949 | -1.93  |
| MmugDNA.19623.1.S1_s_at | LOC714423 ///<br>LOC722929 ///<br>TUBB2B | 1.17E-03 | 0.04208 | -0.93  | -1.906 |
| MmugDNA.25754.1.S1_at   | ---                                      | 1.21E-03 | 0.04258 | -1.618 | -3.07  |
| MmugDNA.13700.1.S1_at   | LOC100505963                             | 1.20E-03 | 0.04258 | -0.591 | -1.507 |
| MmugDNA.7733.1.S1_at    | IGF1                                     | 1.21E-03 | 0.04267 | -1.679 | -3.203 |
| MmugDNA.4061.1.S1_at    | IGF1                                     | 1.25E-03 | 0.04324 | -1.807 | -3.499 |
| MmunewRS.671.1.S1_at    | ---                                      | 1.25E-03 | 0.04334 | -1.038 | -2.054 |
| MmugDNA.17984.1.S1_at   | LOC714408                                | 1.29E-03 | 0.04361 | -0.815 | -1.759 |
| MmugDNA.28597.1.S1_at   | SVEP1                                    | 1.31E-03 | 0.04383 | -1.571 | -2.972 |
| MmuSTS.4328.1.S1_at     | SERPINE2                                 | 1.32E-03 | 0.04392 | -1.494 | -2.816 |
| MmuSTS.4270.1.S1_at     | GRPR                                     | 1.33E-03 | 0.04394 | -1.479 | -2.788 |
| MmugDNA.39818.1.S1_at   | TRIM72                                   | 1.33E-03 | 0.04394 | -0.664 | -1.584 |
| MmugDNA.26190.1.S1_at   | ---                                      | 1.35E-03 | 0.04403 | -0.715 | -1.641 |



|                         |                                                                                                                     |          |         |        |        |
|-------------------------|---------------------------------------------------------------------------------------------------------------------|----------|---------|--------|--------|
| MmugDNA.4983.1.S1_at    | LOC708451                                                                                                           | 1.34E-03 | 0.04403 | -0.981 | -1.974 |
| MmugDNA.18337.1.S1_at   | LOC717705                                                                                                           | 1.36E-03 | 0.04426 | -0.791 | -1.731 |
| MmugDNA.12725.1.S1_at   | TMEM158                                                                                                             | 1.38E-03 | 0.04435 | -0.971 | -1.96  |
| MmugDNA.13770.1.S1_at   | LOC708271                                                                                                           | 1.41E-03 | 0.0449  | -0.825 | -1.772 |
| MmugDNA.703.1.S1_at     | CA2                                                                                                                 | 1.42E-03 | 0.04501 | -1.868 | -3.65  |
| MmugDNA.20852.1.S1_at   | CADPS                                                                                                               | 1.45E-03 | 0.04533 | -1.786 | -3.449 |
| MmugDNA.24473.1.S1_at   | ---                                                                                                                 | 1.58E-03 | 0.04721 | -0.602 | -1.518 |
| MmugDNA.36519.1.S1_at   | SYTL4                                                                                                               | 1.58E-03 | 0.04725 | -0.927 | -1.901 |
| MmugDNA.7255.1.S1_at    | ---                                                                                                                 | 1.61E-03 | 0.04728 | -0.898 | -1.863 |
| MmugDNA.35559.1.S1_at   | HIST1H1D                                                                                                            | 1.59E-03 | 0.04728 | -0.652 | -1.571 |
| MmugDNA.4046.1.S1_at    | THBS1                                                                                                               | 1.62E-03 | 0.04732 | -1.061 | -2.087 |
| MmugDNA.19039.1.S1_at   | TMPRSS3                                                                                                             | 1.62E-03 | 0.04732 | -0.599 | -1.515 |
| MmugDNA.41205.1.S1_at   | CPXM2                                                                                                               | 1.70E-03 | 0.0481  | -1.014 | -2.019 |
| MmugDNA.39756.1.S1_at   | ANK2                                                                                                                | 1.80E-03 | 0.04888 | -0.6   | -1.516 |
| MmugDNA.4784.1.S1_at    | LOC100506695<br>/// PHF21B                                                                                          | 1.80E-03 | 0.04888 | -0.915 | -1.885 |
| MmugDNA.36465.1.S1_s_at | LOC709119                                                                                                           | 1.79E-03 | 0.04888 | -1.118 | -2.17  |
| MmugDNA.4045.1.S1_at    | THBS1                                                                                                               | 1.81E-03 | 0.04898 | -0.949 | -1.931 |
| MmugDNA.15276.1.S1_at   | SVEP1                                                                                                               | 1.84E-03 | 0.04923 | -1.435 | -2.703 |
| MmugDNA.19623.1.S1_at   | LOC100426949<br>/// LOC714423<br>/// TUBB2B                                                                         | 1.92E-03 | 0.04995 | -0.736 | -1.665 |
| MmugDNA.22037.1.S1_at   | VCAN                                                                                                                | 1.93E-03 | 0.05011 | -1.056 | -2.079 |
| MmugDNA.36098.1.S1_at   | ANKRD37                                                                                                             | 1.98E-03 | 0.05041 | -1.018 | -2.024 |
| MmuSTS.2038.1.S1_at     | LOC696649                                                                                                           | 2.02E-03 | 0.05066 | -0.706 | -1.632 |
| MmuSTS.2105.1.S1_s_at   | ---                                                                                                                 | 2.09E-03 | 0.05094 | -0.624 | -1.541 |
| MmugDNA.30662.1.S1_at   | CACNA1G                                                                                                             | 2.07E-03 | 0.05094 | -1.359 | -2.566 |
| Mmu.6061.1.S1_at        | GRPR                                                                                                                | 2.10E-03 | 0.05109 | -1.901 | -3.735 |
| MmugDNA.6483.1.S1_at    | ---                                                                                                                 | 2.12E-03 | 0.05113 | -0.886 | -1.848 |
| MmugDNA.38092.1.S1_at   | IGF1                                                                                                                | 2.12E-03 | 0.05113 | -1.812 | -3.512 |
| MmugDNA.36457.1.S1_at   | NCKAP5                                                                                                              | 2.12E-03 | 0.05113 | -0.607 | -1.523 |
| MmuSTS.2715.1.S1_at     | HIST1H2BM                                                                                                           | 2.16E-03 | 0.0516  | -0.728 | -1.656 |
| MmugDNA.42756.1.S1_at   | ---                                                                                                                 | 2.27E-03 | 0.05205 | -1.011 | -2.015 |
| MmugDNA.29315.1.S1_at   | DEPDC1<br>HIST1H3D<br>///<br>LOC100425854<br>///<br>LOC100430668<br>/// LOC695427                                   | 2.28E-03 | 0.05205 | -1.236 | -2.356 |
| MmuSTS.4311.1.S1_at     | /// LOC695891<br>/// LOC696204<br>/// LOC698105<br>/// LOC698615<br>/// LOC698731<br>/// LOC703889<br>/// LOC705770 | 2.28E-03 | 0.05205 | -1.018 | -2.025 |
| MmugDNA.15700.1.S1_s_at | PHGDH                                                                                                               | 2.29E-03 | 0.05219 | -0.877 | -1.837 |
| MmugDNA.38084.1.S1_s_at | LOC703270                                                                                                           | 2.31E-03 | 0.05225 | -1.051 | -2.072 |
| MmuSTS.4328.1.S1_x_at   | SERPINE2                                                                                                            | 2.31E-03 | 0.05226 | -1.395 | -2.63  |

|                         |                                                                                                                                                                                                        |          |         |        |         |
|-------------------------|--------------------------------------------------------------------------------------------------------------------------------------------------------------------------------------------------------|----------|---------|--------|---------|
| MmuSTS.2710.1.S1_at     | ---                                                                                                                                                                                                    | 2.34E-03 | 0.05256 | -1.538 | -2.904  |
| Mmu.6061.1.A1_at        | ---                                                                                                                                                                                                    | 2.36E-03 | 0.05273 | -1.832 | -3.559  |
| MmuSTS.3432.1.S1_at     | COL1A2                                                                                                                                                                                                 | 2.40E-03 | 0.05297 | -1.476 | -2.781  |
| MmugDNA.18663.1.S1_at   | SLIT2                                                                                                                                                                                                  | 2.41E-03 | 0.05317 | -0.953 | -1.936  |
| MmugDNA.5533.1.S1_at    | CDH11                                                                                                                                                                                                  | 2.48E-03 | 0.05334 | -0.984 | -1.978  |
| MmugDNA.24835.1.S1_at   | LOC100423631<br>/// VCAN                                                                                                                                                                               | 2.48E-03 | 0.05334 | -1.2   | -2.297  |
| MmugDNA.32604.1.S1_at   | LOC713186                                                                                                                                                                                              | 2.46E-03 | 0.05334 | -0.825 | -1.772  |
| MmugDNA.22333.1.S1_at   | ---                                                                                                                                                                                                    | 2.49E-03 | 0.0534  | -0.742 | -1.672  |
| Mmu.11820.13.S1_a_at    | SERPINE2                                                                                                                                                                                               | 2.51E-03 | 0.05361 | -1.397 | -2.633  |
| MmugDNA.36465.1.S1_at   | LOC709119                                                                                                                                                                                              | 2.54E-03 | 0.05383 | -1.075 | -2.107  |
| MmugDNA.38084.1.S1_at   | LOC703270                                                                                                                                                                                              | 2.57E-03 | 0.05389 | -1.096 | -2.137  |
| MmugDNA.38304.1.S1_at   | GPR157                                                                                                                                                                                                 | 2.58E-03 | 0.05405 | -1.078 | -2.111  |
| MmugDNA.8073.1.S1_at    | CDC25C                                                                                                                                                                                                 | 2.62E-03 | 0.05434 | -0.637 | -1.555  |
| MmugDNA.22274.1.S1_at   | LOC100423631                                                                                                                                                                                           | 2.76E-03 | 0.05519 | -1.009 | -2.012  |
| MmuSTS.3830.1.S1_at     | LOC718903                                                                                                                                                                                              | 2.79E-03 | 0.0556  | -0.902 | -1.868  |
| MmugDNA.41094.1.S1_at   | CYP4F22                                                                                                                                                                                                | 2.84E-03 | 0.05614 | -0.731 | -1.659  |
| MmugDNA.40906.1.S1_at   | DEPDC1                                                                                                                                                                                                 | 2.84E-03 | 0.05614 | -0.807 | -1.75   |
| MmuSTS.415.1.S1_at      | ---                                                                                                                                                                                                    | 2.92E-03 | 0.05669 | -1.58  | -2.99   |
| MmugDNA.25691.1.S1_at   | SLC16A6                                                                                                                                                                                                | 2.95E-03 | 0.05686 | -0.645 | -1.564  |
| MmugDNA.9079.1.S1_at    | C20orf46                                                                                                                                                                                               | 3.05E-03 | 0.05765 | -0.734 | -1.663  |
| MmugDNA.15212.1.S1_at   | ---                                                                                                                                                                                                    | 3.07E-03 | 0.05774 | -1.12  | -2.174  |
| MmugDNA.15395.1.S1_s_at | CACNA1G                                                                                                                                                                                                | 3.19E-03 | 0.05868 | -0.691 | -1.614  |
| MmuSTS.3429.1.S1_at     | COL12A1<br>HIS11H3D ///<br>LOC100425854<br>///<br>LOC100430668<br>/// LOC695427<br>/// LOC695891<br>/// LOC696204<br>/// LOC698105<br>/// LOC698615<br>/// LOC698731<br>/// LOC703889<br>/// LOC705220 | 3.24E-03 | 0.05868 | -1.281 | -2.431  |
| MmuSTS.4311.1.S1_x_at   | /// LOC695891<br>/// LOC696204<br>/// LOC698105<br>/// LOC698615<br>/// LOC698731<br>/// LOC703889<br>/// LOC705220                                                                                    | 3.26E-03 | 0.05889 | -0.975 | -1.965  |
| MmugDNA.31327.1.S1_at   | SLIT2                                                                                                                                                                                                  | 3.28E-03 | 0.059   | -0.751 | -1.682  |
| MmugDNA.603.1.S1_at     | RCN3                                                                                                                                                                                                   | 3.31E-03 | 0.05929 | -0.802 | -1.743  |
| MmunewRS.250.1.S1_at    | ---                                                                                                                                                                                                    | 3.34E-03 | 0.05945 | -0.649 | -1.568  |
| MmuSTS.440.1.S1_at      | AGTR2                                                                                                                                                                                                  | 3.37E-03 | 0.05966 | -0.944 | -1.924  |
| MmugDNA.23448.1.S1_at   | KRT14 ///<br>LOC707236                                                                                                                                                                                 | 3.41E-03 | 0.05978 | -0.86  | -1.814  |
| MmugDNA.22509.1.S1_at   | LOC714408                                                                                                                                                                                              | 3.41E-03 | 0.05978 | -0.864 | -1.82   |
| MmugDNA.24837.1.S1_s_at | LOC714602                                                                                                                                                                                              | 3.49E-03 | 0.06018 | -0.929 | -1.903  |
| MmugDNA.15512.1.S1_at   | GLRB                                                                                                                                                                                                   | 3.53E-03 | 0.06034 | -1.176 | -2.26   |
| MmuSTS.1433.1.S1_at     | KRT2                                                                                                                                                                                                   | 3.52E-03 | 0.06034 | -3.577 | -11.937 |
| MmugDNA.12227.1.S1_at   | PPP1R3B                                                                                                                                                                                                | 3.52E-03 | 0.06034 | -0.592 | -1.508  |
| MmuSTS.4406.1.S1_at     | LOC722009                                                                                                                                                                                              | 3.55E-03 | 0.06036 | -1.422 | -2.68   |
| MmugDNA.8896.1.S1_at    | FOXN1                                                                                                                                                                                                  | 3.56E-03 | 0.06039 | -0.965 | -1.952  |

|                         |                                                                                                                                                                                                      |          |         |        |        |
|-------------------------|------------------------------------------------------------------------------------------------------------------------------------------------------------------------------------------------------|----------|---------|--------|--------|
| MmugDNA.8731.1.S1_at    | COL12A1                                                                                                                                                                                              | 3.56E-03 | 0.06041 | -0.792 | -1.732 |
| MmugDNA.23735.1.S1_at   | ---                                                                                                                                                                                                  | 3.63E-03 | 0.06061 | -0.754 | -1.687 |
| MmugDNA.21403.1.S1_at   | CDCA3                                                                                                                                                                                                | 3.65E-03 | 0.06085 | -0.753 | -1.686 |
| MmugDNA.41853.1.S1_at   | FOXN1                                                                                                                                                                                                | 3.66E-03 | 0.06085 | -1.278 | -2.425 |
| MmugDNA.40338.1.S1_s_at | LOC722009                                                                                                                                                                                            | 3.68E-03 | 0.06085 | -1.353 | -2.555 |
| MmugDNA.42829.1.S1_s_at | TMEM54                                                                                                                                                                                               | 3.66E-03 | 0.06085 | -0.701 | -1.626 |
| MmugDNA.2568.1.S1_at    | ADAM12                                                                                                                                                                                               | 3.72E-03 | 0.06121 | -1.454 | -2.74  |
| MmugDNA.18785.1.S1_at   | LOC100426120                                                                                                                                                                                         | 3.74E-03 | 0.06134 | -1.142 | -2.208 |
| MmugDNA.38800.1.S1_at   | GJA1<br>HIS11H3D ///<br>LOC100425854<br>///<br>LOC100430668<br>/// LOC695427<br>/// LOC695891<br>/// LOC696204<br>/// LOC698105<br>/// LOC698615<br>/// LOC698731<br>/// LOC703889<br>/// LOC705220  | 3.77E-03 | 0.06156 | -0.611 | -1.527 |
| MmuSTS.662.1.S1_at      | PERP                                                                                                                                                                                                 | 3.80E-03 | 0.06156 | -0.599 | -1.515 |
| MmugDNA.1157.1.S1_at    | CRYGS ///<br>TBCCD1                                                                                                                                                                                  | 3.80E-03 | 0.06156 | -0.708 | -1.634 |
| MmuSTS.2257.1.S1_at     | ---                                                                                                                                                                                                  | 3.81E-03 | 0.06156 | -2.11  | -4.316 |
| MmugDNA.12819.1.S1_at   | ---                                                                                                                                                                                                  | 3.84E-03 | 0.06178 | -0.791 | -1.73  |
| MmunewRS.1070.1.S1_at   | ---                                                                                                                                                                                                  | 3.85E-03 | 0.06178 | -1.33  | -2.515 |
| MmugDNA.32918.1.S1_at   | COL12A1                                                                                                                                                                                              | 3.86E-03 | 0.06178 | -1.229 | -2.345 |
| MmugDNA.11761.1.S1_at   | GREM1                                                                                                                                                                                                | 3.85E-03 | 0.06178 | -0.658 | -1.578 |
| MmugDNA.23860.1.S1_at   | LOC697857                                                                                                                                                                                            | 3.92E-03 | 0.06208 | -0.586 | -1.501 |
| MmugDNA.3428.1.S1_at    | SGOL2<br>HIS11H3D ///<br>LOC100425854<br>///<br>LOC100430668<br>/// LOC695427<br>/// LOC695891<br>/// LOC696204<br>/// LOC698105<br>/// LOC698615<br>/// LOC698731<br>/// LOC703889<br>/// LOC705220 | 3.96E-03 | 0.06228 | -0.967 | -1.955 |
| MmugDNA.1027.1.S1_at    | ---                                                                                                                                                                                                  | 3.99E-03 | 0.06241 | -0.826 | -1.773 |
| MmugDNA.38346.1.S1_at   | ---                                                                                                                                                                                                  | 3.99E-03 | 0.06241 | -1.25  | -2.379 |
| MmugDNA.40336.1.S1_at   | LOC722009                                                                                                                                                                                            | 4.08E-03 | 0.06289 | -1.357 | -2.561 |
| MmugDNA.41450.1.S1_at   | ---                                                                                                                                                                                                  | 4.11E-03 | 0.06299 | -0.901 | -1.867 |
| MmuSTS.3365.1.S1_at     | ---                                                                                                                                                                                                  | 4.09E-03 | 0.06299 | -2.036 | -4.1   |
| MmuSTS.3275.1.S1_at     | RRM2                                                                                                                                                                                                 | 4.17E-03 | 0.06334 | -1.211 | -2.315 |
| MmugDNA.40278.1.S1_at   | LOC712321                                                                                                                                                                                            | 4.17E-03 | 0.06337 | -1.08  | -2.114 |
| MmugDNA.29748.1.S1_at   | MMP23B                                                                                                                                                                                               | 4.19E-03 | 0.06339 | -0.753 | -1.685 |
| MmugDNA.28128.1.S1_at   | CITED4                                                                                                                                                                                               | 4.21E-03 | 0.06353 | -0.71  | -1.635 |

|                         |               |          |         |        |        |
|-------------------------|---------------|----------|---------|--------|--------|
| Mmu.14060.1.A1_at       | COL1A1        | 4.23E-03 | 0.06355 | -1.393 | -2.627 |
| Mmu.10187.1.S1_at       | ---           | 4.30E-03 | 0.06382 | -1.095 | -2.136 |
| MmugDNA.7301.1.S1_s_at  | ---           | 4.31E-03 | 0.06384 | -0.828 | -1.775 |
| MmugDNA.37013.1.S1_at   | LOC100424517  | 4.41E-03 | 0.06446 | -0.593 | -1.508 |
| MmugDNA.15512.1.S1_s_at | GLRB          | 4.44E-03 | 0.06453 | -1.264 | -2.402 |
| MmugDNA.33139.1.S1_at   | NEFM          | 4.45E-03 | 0.06469 | -0.798 | -1.739 |
| MmugDNA.28136.1.S1_at   | LOX           | 4.52E-03 | 0.06501 | -1.221 | -2.331 |
| MmuSTS.4094.1.S1_at     | EDNRB         | 4.57E-03 | 0.06541 | -0.734 | -1.663 |
| MmuSTS.4111.1.S1_at     | EGF           | 4.60E-03 | 0.0657  | -0.838 | -1.788 |
|                         | HIST1H3D ///  |          |         |        |        |
|                         | LOC100425854  |          |         |        |        |
|                         | ///           |          |         |        |        |
|                         | LOC100430668  |          |         |        |        |
|                         | /// LOC695427 |          |         |        |        |
| MmugDNA.2184.1.S1_at    | /// LOC695891 | 4.61E-03 | 0.06575 | -1.101 | -2.146 |
|                         | /// LOC696204 |          |         |        |        |
|                         | /// LOC698105 |          |         |        |        |
|                         | /// LOC698615 |          |         |        |        |
|                         | /// LOC698731 |          |         |        |        |
|                         | /// LOC703889 |          |         |        |        |
|                         | /// LOC705220 |          |         |        |        |
| MmugDNA.38268.1.S1_at   | AFF3          | 4.63E-03 | 0.06586 | -1.133 | -2.194 |
| MmuSTS.4231.1.S1_at     | ---           | 4.65E-03 | 0.06603 | -1.351 | -2.551 |
| MmugDNA.2512.1.S1_at    | LOC695836     | 4.65E-03 | 0.06603 | -0.697 | -1.622 |
| MmugDNA.15302.1.S1_s_at | FAM162A       | 4.72E-03 | 0.06606 | -0.625 | -1.542 |
| MmugDNA.9906.1.S1_at    | HIST1H1B      | 4.73E-03 | 0.06606 | -0.876 | -1.836 |
|                         | LOC100424162  |          |         |        |        |
| MmuSTS.2954.1.S1_at     | /// LOC719283 | 4.72E-03 | 0.06606 | -2.015 | -4.041 |
|                         | /// LOC722990 |          |         |        |        |
| MmuAffx.23.8.S1_s_at    | SERPINE2      | 4.82E-03 | 0.0663  | -1.201 | -2.299 |
| MmuSTS.4445.1.S1_at     | LOC702153     | 4.88E-03 | 0.06684 | -1.912 | -3.764 |
| MmugDNA.35863.1.S1_at   | LOC704204     | 4.89E-03 | 0.06685 | -1.637 | -3.11  |
| MmugDNA.33991.1.S1_at   | ELOVL6        | 5.01E-03 | 0.06735 | -0.755 | -1.688 |
| MmugDNA.18871.1.S1_at   | DLGAP2        | 5.03E-03 | 0.06741 | -0.93  | -1.905 |
| MmugDNA.2684.1.S1_at    | LOC721007     | 5.05E-03 | 0.06751 | -0.718 | -1.645 |
| MmugDNA.9304.1.S1_at    | C7H15orf52    | 5.12E-03 | 0.06757 | -0.836 | -1.785 |
| MmuSTS.3607.1.S1_at     | CDH11         | 5.11E-03 | 0.06757 | -0.966 | -1.953 |
| MmugDNA.15862.1.S1_at   | CKS2          | 5.12E-03 | 0.06757 | -0.614 | -1.53  |
| MmuAffx.23.13.S1_s_at   | H19           | 5.09E-03 | 0.06757 | -0.938 | -1.915 |
| MmugDNA.34995.1.S1_s_at | COL1A1        | 5.27E-03 | 0.06828 | -0.663 | -1.584 |
| MmugDNA.29771.1.S1_at   | ZNF681        | 5.26E-03 | 0.06828 | -0.708 | -1.634 |

|                         |               |          |         |        |        |
|-------------------------|---------------|----------|---------|--------|--------|
|                         | HIST1H3D ///  |          |         |        |        |
|                         | LOC100425854  |          |         |        |        |
|                         | ///           |          |         |        |        |
|                         | LOC100430668  |          |         |        |        |
|                         | /// LOC695427 |          |         |        |        |
| MmugDNA.29213.1.S1_at   | /// LOC695891 | 5.31E-03 | 0.06847 | -0.891 | -1.854 |
|                         | /// LOC696204 |          |         |        |        |
|                         | /// LOC698105 |          |         |        |        |
|                         | /// LOC698615 |          |         |        |        |
|                         | /// LOC698731 |          |         |        |        |
|                         | /// LOC703889 |          |         |        |        |
|                         | /// LOC705220 |          |         |        |        |
| MmugDNA.16852.1.S1_at   | LTB4R         | 5.31E-03 | 0.06847 | -0.699 | -1.623 |
| MmugDNA.35444.1.S1_x_at | CST5          | 5.37E-03 | 0.06875 | -0.673 | -1.594 |
| MmugDNA.408.1.S1_at     | HIST1H2BC     | 5.40E-03 | 0.06879 | -0.609 | -1.526 |
|                         | HIST1H2AD /// |          |         |        |        |
| MmugDNA.17111.1.S1_at   | HIST1H2AE /// | 5.43E-03 | 0.06896 | -0.683 | -1.605 |
|                         | LOC697977     |          |         |        |        |
| MmugDNA.21026.1.S1_at   | TCERG1L       | 5.44E-03 | 0.06896 | -1.072 | -2.102 |
| MmugDNA.36138.1.S1_at   | CAMK2D        | 5.49E-03 | 0.06916 | -0.652 | -1.571 |
| MmugDNA.27683.1.S1_at   | ADAMTS2       | 5.54E-03 | 0.06929 | -1.181 | -2.267 |
| MmugDNA.7448.1.S1_at    | NEIL3         | 5.59E-03 | 0.06947 | -1.038 | -2.053 |
| MmugDNA.11429.1.S1_at   | LYPD6B        | 5.78E-03 | 0.07037 | -0.72  | -1.647 |
|                         | FAM84A ///    |          |         |        |        |
| MmugDNA.21019.1.S1_at   | LOC712089     | 5.83E-03 | 0.07039 | -0.865 | -1.821 |
| MmugDNA.19527.1.S1_s_at | SOHLH2        | 5.88E-03 | 0.07063 | -0.887 | -1.849 |
| MmugDNA.10186.1.S1_at   | CASC5         | 5.90E-03 | 0.07066 | -0.986 | -1.981 |
| MmugDNA.43588.1.S1_at   | CENPW         | 5.91E-03 | 0.07072 | -0.888 | -1.851 |
| MmugDNA.2768.1.S1_at    | NUF2          | 5.91E-03 | 0.07072 | -0.902 | -1.869 |
| MmugDNA.14253.1.S1_at   | ---           | 5.96E-03 | 0.07096 | -0.768 | -1.703 |
| MmugDNA.39863.1.S1_at   | SKA1          | 6.03E-03 | 0.07127 | -0.987 | -1.982 |
| MmugDNA.13155.1.S1_at   | LOC100423631  | 6.08E-03 | 0.07152 | -1.073 | -2.104 |
| MmugDNA.37390.1.S1_at   | CDCA3         | 6.10E-03 | 0.07155 | -0.716 | -1.643 |
| MmugDNA.37656.1.S1_at   | DSG1          | 6.11E-03 | 0.07168 | -1.513 | -2.854 |
| MmugDNA.41888.1.S1_at   | UGT8          | 6.15E-03 | 0.07181 | -1.012 | -2.017 |
| MmugDNA.41865.1.S1_at   | PCOLCE        | 6.26E-03 | 0.07231 | -1.226 | -2.34  |
| MmuSTS.2698.1.S1_at     | HIST1H2BH     | 6.37E-03 | 0.07292 | -0.589 | -1.505 |
| MmugDNA.8928.1.S1_at    | ---           | 6.39E-03 | 0.07307 | -0.727 | -1.655 |
| MmuSTS.3242.1.S1_at     | LOC100426120  | 6.46E-03 | 0.07349 | -1.143 | -2.208 |
| MmugDNA.28897.1.S1_at   | LOC721010     | 6.47E-03 | 0.07349 | -0.782 | -1.719 |
| MmugDNA.17143.1.S1_x_at | LOC697469     | 6.50E-03 | 0.07351 | -0.663 | -1.584 |
| MmugDNA.22311.1.S1_at   | ---           | 6.60E-03 | 0.0742  | -0.696 | -1.621 |
| MmugDNA.40939.1.S1_at   | ---           | 6.63E-03 | 0.07434 | -0.771 | -1.707 |
| MmugDNA.27864.1.S1_at   | COL12A1       | 6.67E-03 | 0.07453 | -1.102 | -2.146 |
| MmugDNA.12384.1.S1_at   | ---           | 6.73E-03 | 0.0749  | -0.654 | -1.573 |
| MmugDNA.25585.1.S1_at   | ---           | 6.77E-03 | 0.07507 | -0.641 | -1.559 |
| MmunewRS.328.1.S1_at    | LOC719353     | 6.78E-03 | 0.0751  | -0.971 | -1.96  |
| MmuSTS.1558.1.S1_at     | MELK          | 6.80E-03 | 0.07523 | -0.836 | -1.786 |
| MmugDNA.22390.1.S1_at   | SLC7A11       | 6.81E-03 | 0.07526 | -0.816 | -1.761 |

|                         |              |          |         |        |        |
|-------------------------|--------------|----------|---------|--------|--------|
| MmuSTS.2742.1.S1_at     | ADAMTS9      | 6.84E-03 | 0.07529 | -0.762 | -1.696 |
| Mmu.2091.5.S1_a_at      | MAMU-AG      | 6.86E-03 | 0.07541 | -0.728 | -1.656 |
| MmuSTS.3541.1.S1_at     | NOD2         | 6.87E-03 | 0.07541 | -0.77  | -1.705 |
| MmugDNA.35993.1.S1_at   | KRT2B        | 7.00E-03 | 0.07596 | -2.091 | -4.261 |
| MmuSTS.4722.1.S1_at     | TRIP13       | 7.11E-03 | 0.07646 | -0.633 | -1.551 |
| MmugDNA.3377.1.S1_at    | ---          | 7.13E-03 | 0.07647 | -0.855 | -1.809 |
| MmugDNA.14959.1.S1_at   | CDK1         | 7.17E-03 | 0.07648 | -0.934 | -1.911 |
| MmugDNA.31405.1.S1_at   | LOC700889    | 7.25E-03 | 0.0769  | -0.739 | -1.669 |
| MmugDNA.2848.1.S1_at    | LOC703270    | 7.26E-03 | 0.077   | -0.593 | -1.509 |
| MmuSTS.751.1.S1_at      | ---          | 7.31E-03 | 0.07704 | -0.732 | -1.661 |
| MmugDNA.38711.1.S1_at   | ---          | 7.32E-03 | 0.07705 | -0.65  | -1.569 |
| MmugDNA.40349.1.S1_at   | LOC720779    | 7.36E-03 | 0.07725 | -0.782 | -1.72  |
| MmuSTS.3246.1.S1_at     | BTG3         | 7.41E-03 | 0.07751 | -0.659 | -1.579 |
| MmuSTS.3431.1.S1_at     | ---          | 7.46E-03 | 0.07772 | -1.095 | -2.136 |
| MmugDNA.12450.1.S1_x_at | LOC100428875 | 7.45E-03 | 0.07772 | -0.595 | -1.511 |
| MmuSTS.3388.1.S1_at     | PAPPA2       | 7.50E-03 | 0.07775 | -0.613 | -1.529 |
| MmugDNA.26867.1.S1_at   | XG           | 7.50E-03 | 0.07775 | -0.598 | -1.513 |
| MmugDNA.33823.1.S1_s_at | KIAA0101     | 7.54E-03 | 0.07785 | -1.314 | -2.487 |
| MmugDNA.11770.1.S1_at   | LOC704204    | 7.64E-03 | 0.07819 | -1.517 | -2.862 |
| MmunewRS.439.1.S1_at    | TMEM26       | 7.67E-03 | 0.07828 | -0.68  | -1.602 |
| MmugDNA.31369.1.S1_at   | RRM2         | 7.68E-03 | 0.07834 | -1.157 | -2.23  |
| MmugDNA.13584.1.S1_at   | KIF23        | 7.72E-03 | 0.07842 | -0.762 | -1.696 |
| MmugDNA.16146.1.S1_at   | ANK1         | 7.76E-03 | 0.07863 | -1.01  | -2.014 |
|                         | HIST1H4A /// |          |         |        |        |
|                         | HIST1H4B /// |          |         |        |        |
|                         | HIST1H4C /// |          |         |        |        |
|                         | HIST1H4D /// |          |         |        |        |
|                         | HIST1H4E /// |          |         |        |        |
|                         | HIST1H4F /// |          |         |        |        |
| MmugDNA.17835.1.S1_at   | HIST1H4H /// | 7.79E-03 | 0.07867 | -0.643 | -1.561 |
|                         | HIST1H4I /// |          |         |        |        |
|                         | HIST1H4J /// |          |         |        |        |
|                         | HIST1H4K /// |          |         |        |        |
|                         | HIST1H4L /// |          |         |        |        |
|                         | HIST2H4A /// |          |         |        |        |
|                         | HIST2H4B /// |          |         |        |        |
|                         | HIST1H4I /// |          |         |        |        |
| MmuSTS.713.1.S1_at      | ---          | 7.83E-03 | 0.07895 | -0.757 | -1.69  |
| MmugDNA.39057.1.S1_at   | CLEC11A      | 7.86E-03 | 0.07909 | -0.665 | -1.586 |
| MmugDNA.31655.1.S1_at   | HIST1H1A     | 7.97E-03 | 0.07948 | -0.67  | -1.591 |
| MmugDNA.26358.1.S1_at   | HIST1H2AK    | 8.01E-03 | 0.07956 | -0.788 | -1.727 |
| MmugDNA.19607.1.S1_at   | ---          | 8.11E-03 | 0.07991 | -0.819 | -1.764 |
| MmugDNA.32413.1.S1_at   | KIF18A       | 8.17E-03 | 0.08013 | -0.971 | -1.96  |
| MmugDNA.22787.1.S1_at   | UBE2T        | 8.18E-03 | 0.08018 | -0.648 | -1.567 |
| MmugDNA.26517.1.S1_at   | FAM84A       | 8.28E-03 | 0.08038 | -0.662 | -1.583 |
| MmugDNA.38031.1.S1_at   | ST8SIA2      | 8.36E-03 | 0.08053 | -0.618 | -1.534 |
| MmugDNA.5375.1.S1_at    | UNC93A       | 8.35E-03 | 0.08053 | -0.711 | -1.636 |
| MmugDNA.19189.1.S1_at   | DDX58        | 8.36E-03 | 0.08054 | -0.679 | -1.601 |
| MmugDNA.9321.1.S1_at    | PCSK6        | 8.37E-03 | 0.08055 | -0.595 | -1.511 |

|                         |                                                                                                                                                                                            |          |         |        |        |
|-------------------------|--------------------------------------------------------------------------------------------------------------------------------------------------------------------------------------------|----------|---------|--------|--------|
| MmugDNA.14976.1.S1_at   | CDH11                                                                                                                                                                                      | 8.44E-03 | 0.08077 | -0.867 | -1.824 |
| MmugDNA.40392.1.S1_at   | LUM                                                                                                                                                                                        | 8.45E-03 | 0.08079 | -1.15  | -2.219 |
| MmuSTS.4185.1.S1_at     | ---                                                                                                                                                                                        | 8.51E-03 | 0.08096 | -0.957 | -1.941 |
| MmugDNA.7319.1.S1_at    | OVOL1                                                                                                                                                                                      | 8.70E-03 | 0.08166 | -0.659 | -1.579 |
| MmugDNA.189.1.S1_at     | IGFBP5                                                                                                                                                                                     | 8.73E-03 | 0.08173 | -0.729 | -1.657 |
| MmugDNA.34796.1.S1_at   | C10orf99                                                                                                                                                                                   | 8.74E-03 | 0.08175 | -1.693 | -3.232 |
| MmugDNA.17972.1.S1_at   | ---                                                                                                                                                                                        | 8.81E-03 | 0.08204 | -0.98  | -1.973 |
| MmugDNA.38558.1.S1_at   | PEG10                                                                                                                                                                                      | 8.83E-03 | 0.08206 | -1.833 | -3.564 |
| MmugDNA.26913.1.S1_at   | ---                                                                                                                                                                                        | 8.85E-03 | 0.08214 | -0.851 | -1.804 |
| MmuSTS.1928.1.S1_at     | LOC712321                                                                                                                                                                                  | 8.87E-03 | 0.08227 | -1.204 | -2.303 |
| MmugDNA.25384.1.S1_at   | LOC707320 ///<br>UBE2C                                                                                                                                                                     | 8.94E-03 | 0.08257 | -0.929 | -1.904 |
| MmugDNA.42834.1.S1_at   | ---                                                                                                                                                                                        | 9.10E-03 | 0.08316 | -0.618 | -1.535 |
|                         | HIS1H3D ///<br>LOC100425854<br>///<br>LOC100430668<br>/// LOC695427<br>/// LOC695891<br>/// LOC696204<br>/// LOC698105<br>/// LOC698615<br>/// LOC698731<br>/// LOC703889<br>/// LOC705220 |          |         |        |        |
| MmuSTS.4309.1.S1_at     |                                                                                                                                                                                            | 9.12E-03 | 0.08316 | -1.031 | -2.043 |
| MmugDNA.24523.1.S1_at   | CDC42                                                                                                                                                                                      | 9.24E-03 | 0.08371 | -0.741 | -1.672 |
| MmugDNA.289.1.S1_at     | ARMC3                                                                                                                                                                                      | 9.33E-03 | 0.08391 | -0.647 | -1.566 |
| MmugDNA.23691.1.S1_at   | LTB4R2                                                                                                                                                                                     | 9.48E-03 | 0.08446 | -0.626 | -1.543 |
| MmugDNA.22878.1.S1_at   | DAPL1                                                                                                                                                                                      | 9.52E-03 | 0.08458 | -0.747 | -1.678 |
| MmugDNA.9453.1.S1_at    | ---                                                                                                                                                                                        | 9.56E-03 | 0.08475 | -1.351 | -2.552 |
| MmuSTS.637.1.S1_at      | IL1F9                                                                                                                                                                                      | 9.66E-03 | 0.08508 | -1.827 | -3.547 |
| MmugDNA.27916.1.S1_at   | LOC100507472<br>/// PCSK6                                                                                                                                                                  | 9.73E-03 | 0.08525 | -0.713 | -1.639 |
| MmugDNA.16301.1.S1_at   | LPIN3                                                                                                                                                                                      | 9.76E-03 | 0.08525 | -0.605 | -1.521 |
| MmugDNA.42888.1.S1_at   | IGFBP5                                                                                                                                                                                     | 9.82E-03 | 0.08542 | -0.784 | -1.722 |
| MmugDNA.1213.1.S1_at    | ---                                                                                                                                                                                        | 9.84E-03 | 0.08546 | -0.867 | -1.824 |
| MmugDNA.11735.1.S1_at   | DDX58                                                                                                                                                                                      | 9.86E-03 | 0.08548 | -0.829 | -1.776 |
| MmugDNA.3353.1.S1_at    | LOC344887                                                                                                                                                                                  | 9.86E-03 | 0.08548 | -0.868 | -1.825 |
| MmuSTS.1534.1.S1_at     | KIF20A                                                                                                                                                                                     | 9.94E-03 | 0.08572 | -0.752 | -1.684 |
| MmugDNA.34480.1.S1_at   | IGFBP5                                                                                                                                                                                     | 1.01E-02 | 0.08617 | -0.649 | -1.568 |
| MmugDNA.4631.1.S1_at    | ---                                                                                                                                                                                        | 1.03E-02 | 0.08696 | -0.98  | -1.972 |
| MmugDNA.18602.1.S1_s_at | PSAT1                                                                                                                                                                                      | 1.03E-02 | 0.08696 | -0.767 | -1.702 |
| MmugDNA.35444.1.S1_at   | CST5                                                                                                                                                                                       | 1.04E-02 | 0.08723 | -0.804 | -1.746 |
| MmugDNA.23996.1.S1_at   | COL1A2                                                                                                                                                                                     | 1.05E-02 | 0.08748 | -0.666 | -1.586 |
| MmugDNA.21696.1.S1_at   | LOC714824                                                                                                                                                                                  | 1.05E-02 | 0.08749 | -0.589 | -1.504 |
| MmugDNA.11073.1.S1_at   | ATP13A4                                                                                                                                                                                    | 1.06E-02 | 0.08752 | -0.67  | -1.591 |
| MmugDNA.28419.1.S1_at   | KRT14 ///<br>LOC707236                                                                                                                                                                     | 1.06E-02 | 0.08758 | -1.784 | -3.445 |
| MmugDNA.26445.1.S1_at   | COL1A1                                                                                                                                                                                     | 1.07E-02 | 0.08775 | -0.739 | -1.669 |

|                         |               |          |         |        |        |
|-------------------------|---------------|----------|---------|--------|--------|
| MmugDNA.10337.1.S1_at   | NKAIN1        | 1.07E-02 | 0.08793 | -0.597 | -1.512 |
| MmugDNA.29029.1.S1_at   | NDUFA4L2      | 1.08E-02 | 0.08819 | -1.496 | -2.821 |
| MmugDNA.21868.1.S1_at   | EMILIN3       | 1.09E-02 | 0.08879 | -0.744 | -1.675 |
| MmugDNA.11557.1.S1_at   | NCAPG         | 1.10E-02 | 0.08891 | -0.685 | -1.607 |
| MmuSTS.3220.1.S1_at     | MYBL1         | 1.10E-02 | 0.08898 | -0.819 | -1.764 |
| MmugDNA.39450.1.S1_at   | LOC713391     | 1.11E-02 | 0.08906 | -0.94  | -1.918 |
| MmugDNA.2666.1.S1_at    | ADAMTS2       | 1.11E-02 | 0.08914 | -1.193 | -2.287 |
| MmugDNA.23496.1.S1_at   | CENPA         | 1.11E-02 | 0.08914 | -0.636 | -1.554 |
| MmuSTS.1579.1.S1_at     | IFIT1         | 1.11E-02 | 0.0893  | -0.898 | -1.863 |
| MmuSTS.3767.1.S1_at     | AADAC         | 1.12E-02 | 0.0895  | -1.955 | -3.876 |
| MmuSTS.2164.1.S1_at     | LOC696598     | 1.12E-02 | 0.0895  | -1.095 | -2.136 |
| MmugDNA.42890.1.S1_at   | IGFBP5        | 1.14E-02 | 0.08983 | -0.667 | -1.587 |
| MmugDNA.35334.1.S1_at   | JPH1          | 1.15E-02 | 0.09003 | -0.874 | -1.833 |
| MmugDNA.19418.1.S1_at   | LOC714282     | 1.15E-02 | 0.09003 | -1.68  | -3.204 |
| MmugDNA.13208.1.S1_at   | ---           | 1.15E-02 | 0.09004 | -1.043 | -2.061 |
| MmugDNA.42549.1.S1_at   | ---           | 1.15E-02 | 0.09006 | -0.655 | -1.574 |
| MmugDNA.28603.1.S1_at   | IL36RN        | 1.15E-02 | 0.09012 | -2.024 | -4.067 |
| MmugDNA.23517.1.S1_at   | FAM65C        | 1.19E-02 | 0.09122 | -0.738 | -1.668 |
| MmugDNA.19373.1.S1_at   | ---           | 1.20E-02 | 0.09139 | -1.316 | -2.49  |
|                         | HIS1H3D ///   |          |         |        |        |
|                         | LOC100425854  |          |         |        |        |
|                         | ///           |          |         |        |        |
|                         | LOC100430668  |          |         |        |        |
|                         | /// LOC695427 |          |         |        |        |
| MmuSTS.4310.1.S1_at     | /// LOC695891 | 1.20E-02 | 0.09144 | -0.917 | -1.888 |
|                         | /// LOC696204 |          |         |        |        |
|                         | /// LOC698105 |          |         |        |        |
|                         | /// LOC698615 |          |         |        |        |
|                         | /// LOC698731 |          |         |        |        |
|                         | /// LOC703889 |          |         |        |        |
|                         | /// LOC705220 |          |         |        |        |
| MmugDNA.15115.1.S1_s_at | FLJ43489      | 1.20E-02 | 0.09159 | -0.76  | -1.694 |
| MmugDNA.29093.1.S1_at   | FILIP1L       | 1.20E-02 | 0.0916  | -0.698 | -1.622 |
| MmugDNA.1001.1.S1_s_at  | ANK1          | 1.22E-02 | 0.09221 | -0.887 | -1.849 |
| MmugDNA.13771.1.S1_at   | LOC708271     | 1.22E-02 | 0.09222 | -0.717 | -1.643 |
| MmugDNA.17164.1.S1_s_at | LOC718709     | 1.22E-02 | 0.09223 | -1.451 | -2.734 |
| MmuSTS.677.1.S1_at      | ---           | 1.23E-02 | 0.09226 | -0.624 | -1.541 |
| MmugDNA.25206.1.S1_at   | CDK1 ///      |          |         |        |        |
|                         | LOC100425263  | 1.25E-02 | 0.0928  | -0.868 | -1.826 |
| MmugDNA.8677.1.S1_at    | ---           | 1.25E-02 | 0.09286 | -0.905 | -1.872 |
| MmugDNA.8182.1.S1_at    | ---           | 1.26E-02 | 0.09311 | -0.829 | -1.776 |
| MmugDNA.31359.1.S1_at   | MOGAT1        | 1.27E-02 | 0.09331 | -0.715 | -1.642 |
| MmugDNA.19988.1.S1_at   | SERPINA6      | 1.27E-02 | 0.09344 | -0.956 | -1.94  |
| MmugDNA.26279.1.S1_at   | MT4           | 1.31E-02 | 0.09451 | -1.054 | -2.076 |
| MmugDNA.23472.1.S1_at   | ---           | 1.31E-02 | 0.09463 | -0.716 | -1.643 |
| MmugDNA.7114.1.S1_at    | CDCA2         | 1.31E-02 | 0.09474 | -0.613 | -1.53  |
| MmugDNA.40891.1.S1_at   | LOC100507226  | 1.32E-02 | 0.09474 | -0.979 | -1.971 |
| MmugDNA.33915.1.S1_at   | LOC715820     | 1.32E-02 | 0.09501 | -0.898 | -1.864 |
| MmugDNA.20575.1.S1_at   | AFF3          | 1.33E-02 | 0.09506 | -0.852 | -1.805 |



|                       |           |          |         |        |        |
|-----------------------|-----------|----------|---------|--------|--------|
| MmugDNA.27572.1.S1_at | ---       | 1.34E-02 | 0.09527 | -0.637 | -1.556 |
| MmugDNA.10011.1.S1_at | ESCO2     | 1.35E-02 | 0.09542 | -0.98  | -1.972 |
| MmuSTS.4250.1.S1_at   | RAD51AP1  | 1.35E-02 | 0.09542 | -0.764 | -1.698 |
| MmugDNA.2312.1.S1_at  | PKP1      | 1.35E-02 | 0.09554 | -0.702 | -1.627 |
| MmuSTS.4701.1.S1_at   | VIPR1     | 1.37E-02 | 0.0959  | -0.687 | -1.61  |
| MmugDNA.4124.1.S1_at  | CDCA5     | 1.38E-02 | 0.09629 | -0.624 | -1.541 |
| MmugDNA.18469.1.S1_at | ZNF107    | 1.39E-02 | 0.09673 | -0.688 | -1.611 |
| MmuSTS.632.1.S1_at    | ---       | 1.39E-02 | 0.0968  | -0.673 | -1.594 |
| MmugDNA.451.1.S1_at   | ---       | 1.40E-02 | 0.09685 | -1.09  | -2.129 |
| MmugDNA.7650.1.S1_at  | AGTR2     | 1.40E-02 | 0.09697 | -0.659 | -1.579 |
| MmugDNA.41841.1.S1_at | ---       | 1.41E-02 | 0.0971  | -1.118 | -2.171 |
| MmuSTS.2069.1.S1_at   | RACGAP1   | 1.42E-02 | 0.09748 | -0.674 | -1.595 |
| MmugDNA.21083.1.S1_at | KRT17     | 1.43E-02 | 0.0976  | -1.046 | -2.065 |
| MmugDNA.29699.1.S1_at | ---       | 1.43E-02 | 0.09761 | -0.699 | -1.624 |
| MmuSTS.713.1.S1_x_at  | ---       | 1.43E-02 | 0.09761 | -0.646 | -1.565 |
| MmugDNA.36864.1.S1_at | SPAG17    | 1.44E-02 | 0.09784 | -0.92  | -1.892 |
| MmuSTS.560.1.S1_at    | LOC713069 | 1.44E-02 | 0.09797 | -0.59  | -1.505 |
| MmugDNA.43348.1.S1_at | SGOL2     | 1.45E-02 | 0.09806 | -0.938 | -1.916 |
| Mmu.886.1.S1_at       | NMRAL1    | 1.48E-02 | 0.09865 | -0.724 | -1.652 |
| MmugDNA.36979.1.S1_at | SLITRK6   | 1.48E-02 | 0.09868 | -0.715 | -1.641 |
| MmugDNA.25696.1.S1_at | NEK2      | 1.49E-02 | 0.09929 | -0.632 | -1.55  |
| MmugDNA.2395.1.S1_at  | PLOD2     | 1.52E-02 | 0.09996 | -0.842 | -1.792 |

**Supplemental Table 4.** Comparing differentially expressed genes as determined by paired t-tests and LIMMA (statistical threshold: at least 1.5 fold change; p<0.05);

<sup>1</sup>= log2 ratio (fold change luteal phase/follicular phase)

**Gene sets unique to student t-tests (260)**

| Probesets             | Gene symbol                                 | p-value     | q-value   | Log2 <sup>1</sup> |
|-----------------------|---------------------------------------------|-------------|-----------|-------------------|
| Mmu.10187.1.S1_at     | ---                                         | 0.00429731  | 0.0638171 | -1.09518          |
| Mmu.11638.2.S1_at     | IGFBP3                                      | 0.0151432   | 0.0997555 | 0.86481           |
| Mmu.12187.1.S1_at     | TNIK                                        | 0.00029896  | 0.0267373 | 0.862424          |
| Mmu.1530.1.S1_at      | ---                                         | 0.00307943  | 0.057819  | 0.796216          |
| Mmu.2091.5.S1_a_at    | MAMU-AG                                     | 0.00685941  | 0.0754122 | -0.727964         |
| Mmu.3418.2.S1_at      | GABARAPL1                                   | 0.00951673  | 0.0845558 | 0.61144           |
| Mmu.6556.1.S1_at      | GLIPR1                                      | 0.00793957  | 0.0793957 | 0.599621          |
| Mmu.6559.1.S1_s_at    | LOC701387                                   | 0.00926298  | 0.0837791 | 0.590618          |
| Mmu.886.1.S1_at       | NMRAL1                                      | 0.0147456   | 0.0986528 | -0.724451         |
| Mmu.891.1.S1_at       | ---                                         | 0.00311354  | 0.0579928 | 0.611712          |
| MmuAffx.23.13.S1_s_at | H19                                         | 0.00509136  | 0.0675736 | -0.937668         |
| MmuSTS.1036.1.S1_at   | ---                                         | 0.00122771  | 0.0428976 | 0.607556          |
| MmuSTS.109.1.S1_at    | ASNS                                        | 0.000137427 | 0.0228129 | -0.732761         |
| MmuSTS.1353.1.S1_at   | KLK2 /// KLK3                               | 0.00590027  | 0.0706864 | 0.645107          |
| MmuSTS.1455.1.S1_at   | ---                                         | 0.00259469  | 0.0541589 | 0.685355          |
| MmuSTS.1534.1.S1_at   | KIF20A                                      | 0.00993858  | 0.0857163 | -0.752123         |
| MmuSTS.1537.1.S1_at   | ---                                         | 0.00830725  | 0.0804931 | 0.617441          |
| MmuSTS.2038.1.S1_at   | LOC696649                                   | 0.00202186  | 0.050655  | -0.706373         |
| MmuSTS.2069.1.S1_at   | RACGAP1                                     | 0.014235    | 0.0974827 | -0.673637         |
| MmuSTS.2164.1.S1_at   | LOC696598                                   | 0.0112351   | 0.0894951 | -1.09508          |
| MmuSTS.2537.1.S1_at   | IGFBP3<br>LOC100424162 ///<br>LOC719283 /// | 0.0106611   | 0.0876915 | 0.979645          |
| MmuSTS.2954.1.S1_at   | LOC722990                                   | 0.00471709  | 0.0660605 | -2.01475          |
| MmuSTS.3246.1.S1_at   | BTG3                                        | 0.00741373  | 0.0775061 | -0.659445         |
| MmuSTS.3280.1.S1_at   | CACNA2D2                                    | 0.0005885   | 0.0332844 | 0.598998          |
| MmuSTS.3512.1.S1_at   | ---                                         | 0.000595177 | 0.0332844 | 0.698341          |
| MmuSTS.3541.1.S1_at   | NOD2                                        | 0.00687159  | 0.0754122 | -0.769956         |
| MmuSTS.3552.1.S1_at   | CST2                                        | 0.0101586   | 0.0865495 | 1.17677           |
| MmuSTS.3552.1.S1_x_at | CST1 /// CST2                               | 0.00360706  | 0.0606136 | 1.00342           |
| MmuSTS.3767.1.S1_at   | AADAC                                       | 0.0112415   | 0.0894951 | -1.95456          |
| MmuSTS.3850.1.S1_at   | ABI3BP                                      | 0.00427308  | 0.063745  | 0.645278          |
| MmuSTS.415.1.S1_at    | ---                                         | 0.00291865  | 0.0566898 | -1.58025          |
| MmuSTS.4185.1.S1_at   | ---                                         | 0.00851079  | 0.0809561 | -0.957039         |
| MmuSTS.4250.1.S1_at   | RAD51AP1                                    | 0.0134641   | 0.0954203 | -0.764165         |

|                         |                  |             |           |           |
|-------------------------|------------------|-------------|-----------|-----------|
|                         | HIST1H3D ///     |             |           |           |
|                         | LOC100425854 /// |             |           |           |
|                         | LOC100430668 /// |             |           |           |
|                         | LOC695427 ///    |             |           |           |
|                         | LOC695891 ///    |             |           |           |
|                         | LOC696204 ///    |             |           |           |
|                         | LOC698105 ///    |             |           |           |
|                         | LOC698615 ///    |             |           |           |
|                         | LOC698731 ///    |             |           |           |
|                         | LOC703889 ///    |             |           |           |
| MmuSTS.4309.1.S1_at     | LOC705220        | 0.00911521  | 0.0831645 | -1.03102  |
| MmuSTS.4436.1.S1_at     | ---              | 0.0122456   | 0.0922526 | 0.930305  |
| MmuSTS.4572.1.S1_at     | LOC100430470     | 0.000299536 | 0.0267373 | 0.596069  |
| MmuSTS.4701.1.S1_at     | VIPR1            | 0.0136795   | 0.0959044 | -0.687032 |
| MmuSTS.4815.1.S1_at     | GABRP            | 0.000712376 | 0.034832  | 1.87368   |
| MmuSTS.560.1.S1_at      | LOC713069        | 0.01443     | 0.0979693 | -0.589776 |
| MmuSTS.632.1.S1_at      | ---              | 0.0139395   | 0.0967986 | -0.672809 |
| MmuSTS.637.1.S1_at      | IL1F9            | 0.00966391  | 0.085076  | -1.82666  |
| MmuSTS.677.1.S1_at      | ---              | 0.0122538   | 0.0922636 | -0.623808 |
| MmuSTS.684.1.S1_at      | IL7R             | 0.00761953  | 0.0781807 | 0.793644  |
| MmuSTS.743.1.S1_at      | ---              | 0.00798945  | 0.0795294 | 0.78189   |
| MmuSTS.751.1.S1_at      | ---              | 0.00730458  | 0.0770363 | -0.731925 |
| MmuSTS.839.1.S1_at      | KLHL24           | 0.00023099  | 0.0255371 | 0.700075  |
| MmuSTS.943.1.S1_at      | ---              | 0.00222077  | 0.051817  | 0.623988  |
| MmuSTS.993.1.S1_at      | ---              | 0.00516826  | 0.0679499 | 0.708855  |
| MmugDNA.1001.1.S1_s_at  | ANK1             | 0.0121848   | 0.0922116 | -0.886719 |
| MmugDNA.10011.1.S1_at   | ESCO2            | 0.0134675   | 0.0954203 | -0.979619 |
| MmugDNA.10337.1.S1_at   | NKAIN1           | 0.0107386   | 0.0879273 | -0.596527 |
| MmugDNA.10626.1.S1_at   | ---              | 0.0098387   | 0.0854584 | 0.643512  |
| MmugDNA.10752.1.S1_at   | ---              | 0.00259675  | 0.0541589 | 0.613193  |
| MmugDNA.11073.1.S1_at   | ATP13A4          | 0.0105626   | 0.0875188 | -0.670041 |
| MmugDNA.11429.1.S1_at   | LYPD6B           | 0.0057808   | 0.0703668 | -0.719821 |
| MmugDNA.11770.1.S1_at   | LOC704204        | 0.00764091  | 0.0781864 | -1.5172   |
| MmugDNA.11976.1.S1_s_at | LOC721986        | 0.000340545 | 0.0280153 | 0.663791  |
| MmugDNA.12036.1.S1_at   | PTPRC            | 0.0112893   | 0.0896678 | 0.642619  |
| MmugDNA.1213.1.S1_at    | ---              | 0.0098428   | 0.0854584 | -0.867068 |
| MmugDNA.12195.1.S1_at   | ---              | 0.0113746   | 0.0898255 | 0.59885   |
| MmugDNA.12227.1.S1_at   | PPP1R3B          | 0.00352255  | 0.0603409 | -0.592479 |
| MmugDNA.12384.1.S1_at   | ---              | 0.00673185  | 0.0749015 | -0.653688 |
| MmugDNA.12450.1.S1_x_at | LOC100428875     | 0.0074492   | 0.0777218 | -0.595203 |
| MmugDNA.12819.1.S1_at   | ---              | 0.00384409  | 0.0617849 | -0.791045 |
| MmugDNA.13139.1.S1_at   | MGC42157         | 0.000190467 | 0.0242687 | 0.670176  |
| MmugDNA.13155.1.S1_at   | LOC100423631     | 0.0060841   | 0.0715165 | -1.073    |

|                         |               |             |            |           |
|-------------------------|---------------|-------------|------------|-----------|
| MmugDNA.13208.1.S1_at   | ---           | 0.0114738   | 0.090043   | -1.04348  |
| MmugDNA.13314.1.S1_at   | ---           | 0.00425819  | 0.0636293  | 0.592825  |
| MmugDNA.13426.1.S1_at   | LOC712844     | 0.00153176  | 0.0465513  | 0.619713  |
| MmugDNA.13584.1.S1_at   | KIF23         | 0.0077192   | 0.0784161  | -0.761805 |
| MmugDNA.13771.1.S1_at   | LOC708271     | 0.012229    | 0.0922172  | -0.716724 |
| MmugDNA.13892.1.S1_at   | TFCP2L1       | 0.00138799  | 0.0443919  | 1.43813   |
| MmugDNA.14309.1.S1_at   | ALCAM         | 0.00831294  | 0.0804931  | 0.876907  |
| MmugDNA.14310.1.S1_at   | ALCAM         | 0.00834149  | 0.0805259  | 0.906976  |
| MmugDNA.14543.1.S1_at   | LRRN1         | 0.00988359  | 0.0855356  | 1.02134   |
| MmugDNA.14545.1.S1_at   | ---           | 0.00761972  | 0.0781807  | 0.635255  |
| MmugDNA.14575.1.S1_at   | ARHGAP42      | 0.0085292   | 0.0809561  | 0.704741  |
| MmugDNA.14737.1.S1_at   | TNIK          | 3.48E-06    | 0.00791133 | 0.707457  |
| MmugDNA.14964.1.S1_at   | TOX2          | 0.000704043 | 0.0345881  | 0.613145  |
| MmugDNA.15115.1.S1_s_at | FLJ43489      | 0.0120248   | 0.0915918  | -0.760398 |
| MmugDNA.15454.1.S1_at   | NKG2D         | 0.000521863 | 0.0322292  | 0.620983  |
| MmugDNA.16146.1.S1_at   | ANK1          | 0.00776128  | 0.0786291  | -1.01002  |
| MmugDNA.16301.1.S1_at   | LPIN3         | 0.00975986  | 0.0852508  | -0.605057 |
| MmugDNA.16852.1.S1_at   | LTB4R         | 0.00530806  | 0.068467   | -0.698849 |
|                         | HIST1H2AD /// |             |            |           |
|                         | HIST1H2AE /// |             |            |           |
| MmugDNA.17111.1.S1_at   | LOC697977     | 0.00543241  | 0.0689616  | -0.682695 |
| MmugDNA.17164.1.S1_s_at | LOC718709     | 0.0122348   | 0.0922268  | -1.45105  |
| MmugDNA.17170.1.S1_at   | KLK2 /// KLK3 | 0.0133551   | 0.095237   | 0.889543  |
| MmugDNA.17932.1.S1_at   | ---           | 0.0108423   | 0.0883981  | 0.620741  |
| MmugDNA.17966.1.S1_x_at | APOE          | 0.000497642 | 0.0317364  | 0.647533  |
| MmugDNA.18138.1.S1_at   | CLDN7         | 0.00922595  | 0.0836326  | 0.806484  |
| MmugDNA.18428.1.S1_at   | ---           | 0.00126963  | 0.0436112  | 0.686743  |
| MmugDNA.18469.1.S1_at   | ZNF107        | 0.0139015   | 0.0967271  | -0.688035 |
| MmugDNA.18602.1.S1_s_at | PSAT1         | 0.0102606   | 0.0869643  | -0.767205 |
| MmugDNA.18871.1.S1_at   | DLGAP2        | 0.00503108  | 0.0674066  | -0.929965 |
| MmugDNA.19195.1.S1_at   | LOC100425521  | 0.0016874   | 0.0481005  | 0.585779  |
| MmugDNA.19418.1.S1_at   | LOC714282     | 0.011459    | 0.0900302  | -1.67983  |
| MmugDNA.19527.1.S1_s_at | SOHLH2        | 0.00588422  | 0.070628   | -0.886967 |
| MmugDNA.19607.1.S1_at   | ---           | 0.00811147  | 0.0799076  | -0.818579 |
| MmugDNA.19732.1.S1_s_at | ---           | 0.00342521  | 0.0597765  | 0.595354  |
| MmugDNA.20112.1.S1_at   | ---           | 0.000498167 | 0.0317364  | 1.21389   |
| MmugDNA.20504.1.S1_at   | LOC100506992  | 0.00818426  | 0.0801757  | 0.627564  |
| MmugDNA.20693.1.S1_at   | ---           | 0.00612797  | 0.0716856  | 1.28086   |
| MmugDNA.20758.1.S1_at   | ---           | 0.00602974  | 0.071273   | 0.649306  |
|                         | FAM84A ///    |             |            |           |
| MmugDNA.21019.1.S1_at   | LOC712089     | 0.00582652  | 0.0703892  | -0.865071 |
| MmugDNA.21083.1.S1_at   | KRT17         | 0.0142627   | 0.0975995  | -1.04595  |
| MmugDNA.21143.1.S1_at   | MAOA          | 0.00392509  | 0.0620866  | 0.592405  |

|                         |                   |             |           |           |
|-------------------------|-------------------|-------------|-----------|-----------|
| MmugDNA.21276.1.S1_at   | ---               | 0.00112077  | 0.0417002 | 1.17343   |
| MmugDNA.21602.1.S1_at   | SPSB1             | 0.0133972   | 0.0952734 | 0.626435  |
| MmugDNA.21696.1.S1_at   | LOC714824         | 0.0105297   | 0.0874927 | -0.588688 |
| MmugDNA.21868.1.S1_at   | EMILIN3           | 0.0109249   | 0.0887852 | -0.744049 |
| MmugDNA.21971.1.S1_at   | ASAH1             | 0.000588429 | 0.0332844 | 0.753741  |
| MmugDNA.22037.1.S1_at   | VCAN              | 0.00193138  | 0.0501124 | -1.05565  |
| MmugDNA.22148.1.S1_at   | SH2D1B            | 0.00016064  | 0.0237471 | 0.612233  |
| MmugDNA.22311.1.S1_at   | ---               | 0.00660246  | 0.074201  | -0.696466 |
| MmugDNA.22390.1.S1_at   | SLC7A11           | 0.00681158  | 0.0752646 | -0.816206 |
| MmugDNA.22878.1.S1_at   | DAPL1             | 0.0095242   | 0.0845761 | -0.746782 |
| MmugDNA.2312.1.S1_at    | PKP1              | 0.0134934   | 0.0955417 | -0.702482 |
| MmugDNA.23290.1.S1_at   | BMF               | 0.00421417  | 0.0635342 | 0.626824  |
| MmugDNA.23472.1.S1_at   | ---               | 0.013095    | 0.0946281 | -0.716162 |
| MmugDNA.23496.1.S1_at   | CENPA             | 0.0111102   | 0.0891421 | -0.635898 |
| MmugDNA.23691.1.S1_at   | LTB4R2            | 0.00947798  | 0.0844586 | -0.625723 |
| MmugDNA.23996.1.S1_at   | COL1A2            | 0.0104971   | 0.0874847 | -0.665809 |
| MmugDNA.24059.1.S1_at   | ---               | 0.0143242   | 0.097718  | 1.00858   |
| MmugDNA.24421.1.S1_at   | TET1              | 0.000540932 | 0.032746  | 0.647176  |
| MmugDNA.24473.1.S1_at   | ---               | 0.00157544  | 0.0472125 | -0.602455 |
| MmugDNA.24630.1.S1_s_at | LOC696059         | 0.00108914  | 0.0413561 | 0.601237  |
| MmugDNA.24738.1.S1_at   | STMN2             | 0.0115332   | 0.0902274 | 1.27586   |
| MmugDNA.24916.1.S1_at   | SVOPL<br>CDK1 /// | 0.012963    | 0.0940696 | 0.719574  |
| MmugDNA.25206.1.S1_at   | LOC100425263      | 0.0124467   | 0.0927964 | -0.868345 |
| MmugDNA.25585.1.S1_at   | ---               | 0.00676487  | 0.0750708 | -0.641005 |
| MmugDNA.25594.1.S1_at   | PIK3C2G           | 0.0121664   | 0.092115  | 0.715375  |
| MmugDNA.26219.1.S1_at   | RASL11B           | 0.000987609 | 0.0395197 | 0.736138  |
| MmugDNA.26279.1.S1_at   | MT4               | 0.013053    | 0.0945127 | -1.05392  |
| MmugDNA.26441.1.S1_at   | ITGA2             | 0.00604778  | 0.0713031 | 0.708775  |
| MmugDNA.26445.1.S1_at   | COL1A1            | 0.0106926   | 0.087748  | -0.739082 |
| MmugDNA.26477.1.S1_at   | JUN               | 0.0136175   | 0.0957151 | 0.61841   |
| MmugDNA.26517.1.S1_at   | FAM84A            | 0.00827716  | 0.0803797 | -0.662469 |
| MmugDNA.2666.1.S1_at    | ADAMTS2           | 0.0111107   | 0.0891421 | -1.19337  |
| MmugDNA.26712.1.S1_at   | ---               | 0.0042599   | 0.0636293 | 0.614696  |
| MmugDNA.26867.1.S1_at   | XG                | 0.00750363  | 0.0777493 | -0.597676 |
| MmugDNA.26913.1.S1_at   | ---               | 0.0088454   | 0.082143  | -0.851305 |
| MmugDNA.272.1.S1_at     | HGF               | 0.00312228  | 0.0580308 | 0.821915  |
| MmugDNA.27266.1.S1_at   | KLHL24            | 0.00222189  | 0.051817  | 0.795674  |
| MmugDNA.27404.1.S1_at   | BBIP1             | 0.00598998  | 0.0710962 | 0.591083  |
| MmugDNA.27538.1.S1_at   | ---               | 0.0042471   | 0.0636293 | 0.652335  |
| MmugDNA.27572.1.S1_at   | ---               | 0.0134325   | 0.0952734 | -0.637396 |
| MmugDNA.27669.1.S1_at   | CMAH              | 0.0104523   | 0.0873342 | 0.825649  |

|                         |                             |             |           |           |
|-------------------------|-----------------------------|-------------|-----------|-----------|
| MmugDNA.27738.1.S1_at   | ---                         | 0.000394267 | 0.0294753 | 0.789696  |
| MmugDNA.27879.1.S1_at   | N4BP2L1<br>LOC100507472 /// | 0.00425736  | 0.0636293 | 0.626704  |
| MmugDNA.27916.1.S1_at   | PCSK6                       | 0.0097303   | 0.0852508 | -0.712502 |
| MmugDNA.27968.1.S1_at   | LOC719422                   | 0.00340207  | 0.0597765 | 0.664984  |
| MmugDNA.28007.1.S1_at   | LOC696781                   | 0.00105829  | 0.0409691 | 0.638472  |
| MmugDNA.28110.1.S1_at   | TNIK                        | 0.000513897 | 0.0320401 | 0.695494  |
| MmugDNA.28128.1.S1_at   | CITED4<br>KRT14 ///         | 0.00421422  | 0.0635342 | -0.709527 |
| MmugDNA.28419.1.S1_at   | LOC707236                   | 0.0105796   | 0.0875751 | -1.78438  |
| MmugDNA.28603.1.S1_at   | IL36RN                      | 0.0115084   | 0.0901172 | -2.02379  |
| MmugDNA.28804.1.S1_at   | FAM83A                      | 0.00778551  | 0.0786729 | 1.01825   |
| MmugDNA.2889.1.S1_at    | PDCD4                       | 0.0118541   | 0.0911033 | 0.591844  |
| MmugDNA.28897.1.S1_at   | LOC721010                   | 0.00647229  | 0.0734949 | -0.781735 |
| MmugDNA.29029.1.S1_at   | NDUFA4L2                    | 0.0107924   | 0.088191  | -1.49612  |
| MmugDNA.29093.1.S1_at   | FILIP1L                     | 0.0120363   | 0.091597  | -0.697625 |
| MmugDNA.29242.1.S1_at   | ZNF337                      | 0.000179525 | 0.0242687 | 1.07322   |
| MmugDNA.29699.1.S1_at   | ---                         | 0.0142739   | 0.0976121 | -0.699254 |
| MmugDNA.29771.1.S1_at   | ZNF681                      | 0.00525595  | 0.068279  | -0.708175 |
| MmugDNA.30.1.S1_at      | ---                         | 0.00305531  | 0.0576463 | 0.794915  |
| MmugDNA.30147.1.S1_at   | LOC711075                   | 0.0022355   | 0.0518706 | 0.645745  |
| MmugDNA.30462.1.S1_at   | MECOM                       | 0.00284793  | 0.0561508 | 0.701789  |
| MmugDNA.30464.1.S1_at   | MECOM                       | 0.00785712  | 0.0790884 | 0.657212  |
| MmugDNA.3074.1.S1_at    | ---                         | 0.00714522  | 0.0764835 | 0.72708   |
| MmugDNA.30977.1.S1_at   | SOX4                        | 0.00388996  | 0.0618613 | 0.703482  |
| MmugDNA.31359.1.S1_at   | MOGAT1                      | 0.0126785   | 0.0933108 | -0.715374 |
| MmugDNA.31438.1.S1_at   | SEPP1                       | 0.00595011  | 0.0709194 | 0.722635  |
| MmugDNA.31655.1.S1_at   | HIST1H1A                    | 0.00796848  | 0.079484  | -0.669794 |
| MmugDNA.31842.1.S1_s_at | TOX3                        | 0.00465498  | 0.066034  | 0.844375  |
| MmugDNA.31898.1.S1_s_at | APOE                        | 0.000123132 | 0.0217444 | 1.11466   |
| MmugDNA.31936.1.S1_at   | HGF                         | 0.00552262  | 0.0692177 | 0.625553  |
| MmugDNA.32072.1.S1_at   | ABHD2                       | 0.000284014 | 0.0265216 | 0.594083  |
| MmugDNA.33073.1.S1_at   | MECOM                       | 0.0123017   | 0.0923923 | 0.704613  |
| MmugDNA.33316.1.S1_at   | SEPP1                       | 0.00287955  | 0.0563323 | 0.633809  |
| MmugDNA.3353.1.S1_at    | LOC344887                   | 0.00985665  | 0.0854829 | -0.86773  |
| MmugDNA.33991.1.S1_at   | ELOVL6                      | 0.00501053  | 0.0673452 | -0.755154 |
| MmugDNA.34480.1.S1_at   | IGFBP5                      | 0.0100784   | 0.0861715 | -0.648991 |
| MmugDNA.34796.1.S1_at   | C10orf99                    | 0.00874077  | 0.0817523 | -1.69264  |
| MmugDNA.34995.1.S1_s_at | COL1A1                      | 0.00526751  | 0.068279  | -0.663173 |
| MmugDNA.35051.1.S1_at   | LOC700181                   | 0.00106855  | 0.041205  | 1.05983   |
| MmugDNA.35141.1.S1_at   | AFAP1                       | 0.00675487  | 0.0750107 | 0.599108  |
| MmugDNA.35334.1.S1_at   | JPH1                        | 0.0114639   | 0.0900302 | -0.874046 |
| MmugDNA.35444.1.S1_at   | CST5                        | 0.0103688   | 0.0872341 | -0.804021 |

|                         |               |             |           |           |
|-------------------------|---------------|-------------|-----------|-----------|
| MmugDNA.35444.1.S1_x_at | CST5          | 0.00537329  | 0.0687465 | -0.672689 |
| MmugDNA.35626.1.S1_at   | ---           | 0.00165378  | 0.0474823 | 0.835325  |
| MmugDNA.35626.1.S1_s_at | ---           | 0.000740914 | 0.0351275 | 0.624082  |
| MmugDNA.35810.1.S1_at   | ADORA2B       | 3.29E-05    | 0.016652  | 0.652004  |
| MmugDNA.35993.1.S1_at   | KRT2B         | 0.00700188  | 0.0759607 | -2.09111  |
| MmugDNA.36098.1.S1_at   | ANKRD37       | 0.00198293  | 0.0504143 | -1.01754  |
| MmugDNA.36457.1.S1_at   | NCKAP5        | 0.00211459  | 0.0511307 | -0.606968 |
| MmugDNA.37013.1.S1_at   | LOC100424517  | 0.00441351  | 0.0644588 | -0.592891 |
| MmugDNA.37336.1.S1_at   | STMN2         | 0.00385093  | 0.0617849 | 1.52392   |
| MmugDNA.37541.1.S1_at   | ---           | 0.00398833  | 0.062411  | 0.713622  |
| MmugDNA.37656.1.S1_at   | DSG1          | 0.00611331  | 0.0716764 | -1.51302  |
| MmugDNA.37863.1.S1_at   | SCN2A         | 0.00791328  | 0.0792784 | 0.885761  |
| MmugDNA.37873.1.S1_at   | MYLK          | 0.0143033   | 0.097718  | 1.12869   |
| MmugDNA.38031.1.S1_at   | ST8SIA2       | 0.0083557   | 0.0805259 | -0.617583 |
| MmugDNA.38159.1.S1_at   | NTRK3         | 0.00410638  | 0.0629872 | 0.750545  |
| MmugDNA.38346.1.S1_at   | ---           | 0.00399263  | 0.0624111 | -1.25008  |
| MmugDNA.38676.1.S1_at   | DSG2          | 0.00500884  | 0.0673452 | 0.652215  |
| MmugDNA.38711.1.S1_at   | ---           | 0.00732012  | 0.0770452 | -0.649832 |
| MmugDNA.38796.1.S1_s_at | LOC700181     | 0.00194711  | 0.0502042 | 0.904797  |
| MmugDNA.38800.1.S1_at   | GJA1          | 0.00377111  | 0.0615602 | -0.611055 |
| MmugDNA.39057.1.S1_at   | CLEC11A       | 0.00786027  | 0.0790884 | -0.665032 |
| MmugDNA.39117.1.S1_at   | ---           | 0.00474082  | 0.0661609 | 0.820182  |
| MmugDNA.39120.1.S1_s_at | ---           | 0.00128075  | 0.0436112 | 0.595757  |
| MmugDNA.39450.1.S1_at   | LOC713391     | 0.011054    | 0.089059  | -0.939747 |
| MmugDNA.39552.1.S1_at   | LOC716250     | 0.0132178   | 0.0949276 | 0.746696  |
| MmugDNA.39596.1.S1_at   | LOC711796     | 0.00411181  | 0.0629872 | 0.664195  |
| MmugDNA.39706.1.S1_at   | SCML4         | 0.00706325  | 0.076265  | 0.592792  |
| MmugDNA.39818.1.S1_at   | TRIM72        | 0.0013258   | 0.0439357 | -0.663664 |
| MmugDNA.39863.1.S1_at   | SKA1          | 0.00603345  | 0.071273  | -0.986924 |
| MmugDNA.40392.1.S1_at   | LUM           | 0.0084537   | 0.0807897 | -1.15008  |
| MmugDNA.40533.1.S1_at   | NTRK3         | 0.00535027  | 0.0686066 | 0.69187   |
| MmugDNA.408.1.S1_at     | HIST1H2BC     | 0.00539659  | 0.0687892 | -0.609495 |
| MmugDNA.40891.1.S1_at   | LOC100507226  | 0.0131475   | 0.0947351 | -0.979235 |
| MmugDNA.4124.1.S1_at    | CDCA5         | 0.0137773   | 0.0962916 | -0.623779 |
| MmugDNA.41267.1.S1_at   | GAS1          | 0.00617446  | 0.0719426 | 0.849968  |
|                         | LOC707609 /// |             |           |           |
| MmugDNA.41808.1.S1_at   | LOC708249     | 0.00699797  | 0.0759607 | 0.648772  |
| MmugDNA.41841.1.S1_at   | ---           | 0.0140908   | 0.097099  | -1.11841  |
| MmugDNA.41888.1.S1_at   | UGT8          | 0.00614782  | 0.0718088 | -1.0123   |
| MmugDNA.41992.1.S1_at   | LOC709786     | 0.00221707  | 0.051817  | 1.05962   |
| MmugDNA.42471.1.S1_at   | IKZF1         | 0.0100171   | 0.0859849 | 0.594123  |
| MmugDNA.42549.1.S1_at   | ---           | 0.0114833   | 0.0900629 | -0.654634 |

|                        |                 |             |           |           |
|------------------------|-----------------|-------------|-----------|-----------|
| MmugDNA.42612.1.S1_at  | ---             | 0.000693724 | 0.0344443 | 1.27803   |
| MmugDNA.42888.1.S1_at  | IGFBP5          | 0.00981777  | 0.0854169 | -0.784098 |
| MmugDNA.42890.1.S1_at  | IGFBP5          | 0.0113641   | 0.0898255 | -0.666609 |
| MmugDNA.43308.1.S1_at  | ---             | 0.00345322  | 0.059977  | 0.991918  |
| MmugDNA.43364.1.S1_at  | SLC16A7         | 0.00221129  | 0.051817  | 0.617542  |
| MmugDNA.4494.1.S1_at   | PTGS2           | 7.35E-05    | 0.0199634 | -0.714656 |
| MmugDNA.4580.1.S1_at   | LOC100130175    | 0.0023032   | 0.0522505 | 0.640049  |
| MmugDNA.4631.1.S1_at   | ---             | 0.0102759   | 0.0869643 | -0.979573 |
| MmugDNA.4900.1.S1_s_at | AMY2A /// AMY2B | 0.00490336  | 0.0668863 | 0.592555  |
| MmugDNA.4915.1.S1_at   | ---             | 0.0141019   | 0.0971299 | 0.868206  |
| MmugDNA.5086.1.S1_at   | CMBL            | 0.000903123 | 0.0386506 | 0.587619  |
| MmugDNA.5095.1.S1_at   | TGIF1           | 0.00181736  | 0.0490182 | 0.591346  |
| MmugDNA.5375.1.S1_at   | UNC93A          | 0.00834561  | 0.0805259 | -0.71058  |
| MmugDNA.5560.1.S1_at   | ---             | 0.000105542 | 0.0212843 | 0.595775  |
| MmugDNA.563.1.S1_at    | ---             | 0.000647834 | 0.0337018 | -0.889792 |
| MmugDNA.5926.1.S1_at   | PGM2L1          | 0.00367798  | 0.0608468 | 0.763895  |
| MmugDNA.6732.1.S1_at   | PLXDC1          | 0.0125833   | 0.0930925 | 0.866898  |
| MmugDNA.6931.1.S1_at   | TSPAN8          | 0.0066292   | 0.0743432 | 0.716437  |
| MmugDNA.7114.1.S1_at   | CDCA2           | 0.013131    | 0.0947351 | -0.613313 |
| MmugDNA.7164.1.S1_at   | ---             | 0.00621218  | 0.0720987 | 0.899654  |
| MmugDNA.7301.1.S1_s_at | ---             | 0.0043115   | 0.0638377 | -0.827782 |
| MmugDNA.7319.1.S1_at   | OVOL1           | 0.0087031   | 0.0816572 | -0.659426 |
| MmugDNA.7729.1.S1_at   | IGFBP3          | 0.0103514   | 0.0872341 | 0.875356  |
| MmugDNA.8010.1.S1_at   | IL7R            | 0.00408798  | 0.0629643 | 0.781943  |
| MmugDNA.8182.1.S1_at   | ---             | 0.0125886   | 0.0931106 | -0.8288   |
| MmugDNA.8677.1.S1_at   | ---             | 0.0124796   | 0.0928606 | -0.904818 |
| MmugDNA.9085.1.S1_at   | SOX9            | 0.00535077  | 0.0686066 | 1.15243   |
| MmugDNA.9304.1.S1_at   | C7H15orf52      | 0.00511898  | 0.0675736 | -0.835569 |
| MmugDNA.9453.1.S1_at   | ---             | 0.0095615   | 0.0847461 | -1.35138  |
| MmunewRS.328.1.S1_at   | LOC719353       | 0.00677691  | 0.0751023 | -0.971165 |
| MmunewRS.439.1.S1_at   | TMEM26          | 0.00767218  | 0.0782792 | -0.679885 |

### Gene sets unique to LIMMA package (13)

| Probesets              | Gene symbol | p-value    | q-value   | Log2 <sup>1</sup> |
|------------------------|-------------|------------|-----------|-------------------|
| MmuSTS.3438.1.S1_at    | ANK2        | 0.00261469 | 0.0943212 | -0.839478         |
| MmuSTS.3567.1.S1_at    | CCL21       | 0.00274601 | 0.0964649 | -1.06647          |
| MmuSTS.644.1.S1_at     | SDHD        | 0.00176061 | 0.0809109 | -0.665322         |
| MmugDNA.11730.1.S1_at  | ---         | 0.00280316 | 0.0972579 | -1.11212          |
| MmugDNA.12625.1.S1_at  | RASGRF2     | 0.00245756 | 0.0922067 | 0.803289          |
| MmugDNA.16895.1.S1_at  | SPON2       | 0.00301138 | 0.0996306 | 0.837916          |
| MmugDNA.1894.1.S1_s_at | TRPM2       | 0.00209379 | 0.0867631 | -0.637617         |



|                       |           |            |           |           |
|-----------------------|-----------|------------|-----------|-----------|
| MmugDNA.28135.1.S1_at | WNT2B     | 0.00275702 | 0.0966348 | -0.599146 |
| MmugDNA.30940.1.S1_at | LOC696907 | 0.00210486 | 0.0868903 | -0.617864 |
| MmugDNA.36643.1.S1_at | PELI2     | 0.00230487 | 0.0899966 | 0.591614  |
| MmugDNA.37123.1.S1_at | LIPA      | 0.00202062 | 0.0858817 | -0.637094 |
| MmugDNA.39472.1.S1_at | CYR61     | 0.00217805 | 0.0879103 | -0.692584 |
| MmugDNA.5485.1.S1_at  | SDPR      | 0.00203197 | 0.0858817 | 0.595461  |

### All gene sets determined by LIMMA (516)

| Probesets             | Gene symbol  | p-value       | q-value                  | Log2 <sup>1</sup>    |
|-----------------------|--------------|---------------|--------------------------|----------------------|
| Probeset ID           | Gene Symbol  | Limma P.Value | Limma<br>qvalue(P.Value) | Limma<br>log2(Ratio) |
| MmugDNA.16407.1.S1_at | LOC696983    | 4.92E-11      | 1.99E-06                 | -3.43799             |
| MmugDNA.18066.1.S1_at | MGC16121     | 1.29E-08      | 0.000259621              | -2.56609             |
| MmuSTS.3842.1.S1_at   | ---          | 1.96E-08      | 0.000263599              | -3.26294             |
| MmugDNA.8918.1.S1_at  | LOC717872    | 4.06E-08      | 0.000409473              | -1.94141             |
| MmugDNA.9587.1.S1_at  | AKAP1        | 7.89E-08      | 0.000627214              | 0.621224             |
| MmugDNA.3203.1.S1_at  | STC1         | 1.06E-07      | 0.000627214              | -2.64769             |
|                       | SLC12A8 ///  |               |                          |                      |
| MmugDNA.11746.1.S1_at | ZNF148       | 1.09E-07      | 0.000627214              | 1.53167              |
| MmuSTS.443.1.S1_at    | AKAP1        | 2.31E-07      | 0.00116363               | 0.618205             |
| MmuSTS.2392.1.S1_at   | PPP1R1B      | 3.29E-07      | 0.00145379               | 1.52026              |
| MmugDNA.34495.1.S1_at | STC1         | 3.60E-07      | 0.00145379               | -2.23274             |
| MmuSTS.3105.1.S1_at   | RARB         | 5.35E-07      | 0.00196441               | 1.49655              |
| MmugDNA.17457.1.S1_at | ---          | 9.03E-07      | 0.00300041               | -1.25845             |
| MmunewRS.99.1.S1_at   | LOC698299    | 9.66E-07      | 0.00300041               | -1.23861             |
| MmugDNA.7882.1.S1_at  | GALNTL2      | 1.07E-06      | 0.00308878               | 2.27384              |
| MmuSTS.2992.1.S1_at   | MMP28        | 1.16E-06      | 0.00311327               | 1.47742              |
| MmuSTS.1547.1.S1_s_at | MSX2         | 1.99E-06      | 0.00412048               | -0.805677            |
| MmuSTS.4301.1.S1_at   | ---          | 2.04E-06      | 0.00412048               | 0.886175             |
| MmuSTS.2805.1.S1_at   | SLC35F3      | 2.05E-06      | 0.00412048               | 0.832845             |
| MmugDNA.20037.1.S1_at | SRPX2        | 2.08E-06      | 0.00412048               | -1.7234              |
|                       | MGC16121 /// |               |                          |                      |
| MmugDNA.36227.1.S1_at | MIR503       | 2.10E-06      | 0.00412048               | -1.19357             |
| MmugDNA.33592.1.S1_at | NHS          | 2.14E-06      | 0.00412048               | 0.932084             |
| MmugDNA.22693.1.S1_at | VEGFA        | 2.85E-06      | 0.00490397               | -1.14761             |
| MmugDNA.17550.1.S1_at | RARB         | 2.87E-06      | 0.00490397               | 1.67548              |
| MmugDNA.19808.1.S1_at | ---          | 2.92E-06      | 0.00490397               | 1.01013              |
| MmugDNA.15362.1.S1_at | HEG1         | 3.89E-06      | 0.0058657                | 0.795473             |
| MmugDNA.32444.1.S1_at | GALNTL2      | 3.95E-06      | 0.0058657                | 1.4676               |
| MmugDNA.5232.1.S1_at  | ---          | 4.07E-06      | 0.0058657                | -1.40492             |
| MmugDNA.8405.1.S1_at  | CRISPLD2     | 4.40E-06      | 0.00612812               | 1.94909              |
| MmugDNA.20407.1.S1_at | VEGFA        | 5.33E-06      | 0.00673976               | -1.14548             |
| MmugDNA.18411.1.S1_at | PDCD4        | 5.52E-06      | 0.00673976               | 0.700812             |

|                        |            |          |            |           |
|------------------------|------------|----------|------------|-----------|
| MmugDNA.43564.1.S1_at  | GABRQ      | 5.63E-06 | 0.00673976 | -1.30998  |
| MmuSTS.628.1.S1_at     | ---        | 5.65E-06 | 0.00673976 | -2.21323  |
| MmugDNA.5657.1.S1_at   | DIO2       | 5.79E-06 | 0.00673976 | -1.63663  |
| MmugDNA.32362.1.S1_at  | MAFB       | 5.96E-06 | 0.00673976 | -0.754244 |
| MmugDNA.3345.1.S1_at   | VEGFA      | 6.01E-06 | 0.00673976 | -0.985552 |
| MmuSTS.1298.1.S1_at    | RBM20      | 6.97E-06 | 0.00760592 | 1.47164   |
| MmuSTS.2793.1.S1_at    | LOC706830  | 8.36E-06 | 0.00844048 | 0.798855  |
| MmugDNA.3785.1.S1_at   | LOC708556  | 8.74E-06 | 0.00860594 | -0.943081 |
| MmuSTS.1980.1.S1_at    | ODZ1       | 9.45E-06 | 0.00907792 | -0.920989 |
| MmugDNA.21308.1.S1_at  | NHS        | 1.16E-05 | 0.00985806 | 0.939699  |
| MmunewRS.70.1.S1_at    | DEFB1      | 1.17E-05 | 0.00985806 | -1.02128  |
| MmuSTS.4699.1.S1_at    | VEGFA      | 1.19E-05 | 0.00985806 | -0.806731 |
| MmugDNA.7733.1.S1_at   | IGF1       | 1.21E-05 | 0.00985806 | -1.6794   |
| MmugDNA.11919.1.S1_at  | MSX2       | 1.27E-05 | 0.00985806 | -0.690825 |
| MmugDNA.10390.1.S1_at  | ---        | 1.28E-05 | 0.00985806 | 0.759494  |
| MmugDNA.36848.1.S1_at  | TFPI2      | 1.28E-05 | 0.00985806 | -2.56138  |
| MmuSTS.3964.1.S1_at    | ---        | 1.32E-05 | 0.00985806 | 0.720517  |
| MmugDNA.4061.1.S1_at   | IGF1       | 1.34E-05 | 0.00985806 | -1.80674  |
| MmugDNA.40984.1.S1_at  | STON1      | 1.40E-05 | 0.00986076 | 0.974404  |
| MmugDNA.7394.1.S1_s_at | ENTPD1     | 1.40E-05 | 0.00986076 | 0.98613   |
| MmugDNA.30579.1.S1_at  | FOXP1      | 1.42E-05 | 0.00986076 | 0.592551  |
| MmugDNA.4421.1.S1_at   | LOC712578  | 1.44E-05 | 0.00986076 | -0.828472 |
| MmugDNA.30303.1.S1_at  | TMEM120B   | 1.58E-05 | 0.0106599  | -0.796417 |
| MmugDNA.8498.1.S1_at   | ---        | 1.77E-05 | 0.0117418  | 0.761308  |
| MmugDNA.5976.1.S1_at   | LOC717646  | 1.84E-05 | 0.0119848  | -0.76829  |
| MmugDNA.78.1.S1_at     | ---        | 1.88E-05 | 0.0120468  | 2.69154   |
| MmugDNA.2942.1.S1_at   | ---        | 1.97E-05 | 0.0124089  | 0.618721  |
| MmugDNA.10251.1.S1_at  | ENTPD1     | 2.19E-05 | 0.0130455  | 1.20378   |
| MmugDNA.35189.1.S1_at  | ANTXR1     | 2.20E-05 | 0.0130455  | 0.849783  |
| MmunewRS.923.1.S1_at   | ---        | 2.29E-05 | 0.0134136  | 0.859572  |
| MmuSTS.2298.1.S1_at    | DFNA5      | 2.36E-05 | 0.0135688  | 1.5563    |
| MmugDNA.39545.1.S1_at  | ST6GALNAC2 | 2.52E-05 | 0.0141446  | 0.763622  |
| MmugDNA.10813.1.S1_at  | ---        | 2.56E-05 | 0.0141446  | 0.890594  |
| MmugDNA.11703.1.S1_at  | DIO2       | 2.65E-05 | 0.0142768  | -1.58623  |
| MmugDNA.13721.1.S1_at  | ---        | 2.66E-05 | 0.0142768  | -0.922946 |
| MmuSTS.2696.1.S1_at    | DIO2       | 2.69E-05 | 0.0142768  | -1.6929   |
| MmuSTS.1506.1.S1_at    | MMP11      | 2.90E-05 | 0.0148507  | -1.19175  |
| MmugDNA.20455.1.S1_at  | LOC708681  | 2.92E-05 | 0.0148507  | 0.814171  |
| MmugDNA.17828.1.S1_at  | OSR1       | 2.94E-05 | 0.0148507  | 1.31186   |
| MmugDNA.8315.1.S1_at   | DIO2       | 3.03E-05 | 0.0148802  | -1.67228  |
| MmugDNA.17516.1.S1_at  | SRPX2      | 3.05E-05 | 0.0148802  | -1.29123  |
| MmugDNA.14000.1.S1_at  | ---        | 3.06E-05 | 0.0148802  | 0.983787  |

|                         |           |          |           |           |
|-------------------------|-----------|----------|-----------|-----------|
| MmugDNA.35052.1.S1_at   | LOC700181 | 3.24E-05 | 0.0154568 | 1.48551   |
| MmugDNA.31648.1.S1_at   | PID1      | 3.26E-05 | 0.0154568 | 1.05442   |
| MmugDNA.7507.1.S1_at    | ABCA9     | 3.29E-05 | 0.0154568 | 1.00218   |
| MmuSTS.4646.1.S1_at     | NTN4      | 3.34E-05 | 0.0154936 | 1.43175   |
| MmuSTS.1520.1.S1_at     | MMP2      | 3.46E-05 | 0.015867  | 1.25716   |
| MmugDNA.34336.1.S1_at   | ---       | 3.56E-05 | 0.0160207 | 0.939462  |
| MmugDNA.6916.1.S1_at    | MMP28     | 3.67E-05 | 0.0160207 | 0.970367  |
| MmugDNA.21514.1.S1_at   | ---       | 3.67E-05 | 0.0160207 | 2.11833   |
| MmugDNA.13486.1.S1_at   | LOC703270 | 3.69E-05 | 0.0160207 | -1.72842  |
| MmugDNA.36983.1.S1_at   | DIO3      | 3.89E-05 | 0.016388  | -1.59138  |
| MmugDNA.11706.1.S1_at   | DIO2      | 3.89E-05 | 0.016388  | -1.25312  |
| MmugDNA.37838.1.S1_at   | ---       | 3.90E-05 | 0.016388  | 0.727589  |
| MmugDNA.5129.1.S1_at    | GADD45G   | 4.13E-05 | 0.0171705 | -0.787336 |
| MmugDNA.40627.1.S1_s_at | LOC710234 | 4.33E-05 | 0.0173792 | 0.589902  |
| MmugDNA.28256.1.S1_at   | GTF2A2    | 4.45E-05 | 0.0173792 | 0.645416  |
| MmugDNA.21291.1.S1_at   | ---       | 4.48E-05 | 0.0173792 | -0.918449 |
| MmugDNA.15470.1.S1_at   | ---       | 4.50E-05 | 0.0173792 | 0.902647  |
| Mmu.10451.1.S1_at       | GDF6      | 4.54E-05 | 0.0173792 | 0.747115  |
| MmugDNA.20518.1.S1_at   | HEG1      | 4.56E-05 | 0.0173792 | 0.903824  |
| MmuSTS.2655.1.S1_at     | ABCA8     | 4.86E-05 | 0.0179925 | 1.86935   |
| MmugDNA.18610.1.S1_at   | MIR210HG  | 5.03E-05 | 0.0182441 | -1.11201  |
| MmugDNA.38092.1.S1_at   | IGF1      | 5.16E-05 | 0.0182441 | -1.81228  |
| MmugDNA.14350.1.S1_at   | ENTPD1    | 5.20E-05 | 0.0182441 | 1.26564   |
| MmugDNA.22309.1.S1_at   | EPHB1     | 5.55E-05 | 0.0191545 | 1.26828   |
| MmugDNA.28501.1.S1_at   | MUM1L1    | 6.07E-05 | 0.0205733 | 1.04816   |
| MmugDNA.5004.1.S1_at    | SEMA5A    | 6.12E-05 | 0.0205733 | 0.8665    |
| MmugDNA.33986.1.S1_at   | SLIT2-IT1 | 6.25E-05 | 0.0208358 | -0.738351 |
| MmugDNA.6257.1.S1_at    | LOC706392 | 6.68E-05 | 0.021788  | 0.700284  |
| MmugDNA.16154.1.S1_at   | LOC711305 | 6.73E-05 | 0.021788  | -0.735626 |
| MmugDNA.10788.1.S1_at   | LOC704750 | 6.96E-05 | 0.0221349 | -0.841571 |
| MmugDNA.19730.1.S1_at   | THRB      | 7.36E-05 | 0.0232017 | 0.778043  |
| MmuSTS.2020.1.S1_at     | PDCD4     | 7.44E-05 | 0.0232017 | 0.725257  |
| MmugDNA.13770.1.S1_at   | LOC708271 | 7.64E-05 | 0.0235448 | -0.825205 |
| MmuSTS.1969.1.S1_at     | LOC717581 | 7.89E-05 | 0.0241219 | 0.756785  |
| MmugDNA.14659.1.S1_at   | ESM1      | 8.03E-05 | 0.0243355 | -1.12055  |
| MmugDNA.33299.1.S1_at   | ---       | 8.16E-05 | 0.0243355 | 1.29906   |
| MmuSTS.3368.1.S1_at     | LOC722330 | 8.20E-05 | 0.0243355 | -0.631466 |

|                         |                  |             |           |           |
|-------------------------|------------------|-------------|-----------|-----------|
|                         | HIST1H3D ///     |             |           |           |
|                         | LOC100425854 /// |             |           |           |
|                         | LOC100430668 /// |             |           |           |
|                         | LOC695427 ///    |             |           |           |
|                         | LOC695891 ///    |             |           |           |
|                         | LOC696204 ///    |             |           |           |
|                         | LOC698105 ///    |             |           |           |
|                         | LOC698615 ///    |             |           |           |
|                         | LOC698731 ///    |             |           |           |
|                         | LOC703889 ///    |             |           |           |
| MmuSTS.4311.1.S1_x_at   | LOC705220        | 8.55E-05    | 0.0251791 | -0.974809 |
| MmuSTS.4004.1.S1_at     | THBS1            | 8.74E-05    | 0.0254253 | -1.18794  |
| Mmu.12651.3.S1_at       | TFPI2            | 8.76E-05    | 0.0254253 | -2.24178  |
| MmugDNA.22230.1.S1_s_at | MMP28            | 9.30E-05    | 0.0267896 | 0.685552  |
| MmugDNA.18538.1.S1_s_at | SERPINI1         | 9.40E-05    | 0.0267896 | 0.69668   |
| MmugDNA.17984.1.S1_at   | LOC714408        | 9.51E-05    | 0.0267896 | -0.814685 |
| MmugDNA.18804.1.S1_at   | ASTN2            | 9.56E-05    | 0.0267896 | -0.997794 |
| MmuSTS.2880.1.S1_at     | THR3             | 0.000100477 | 0.0273437 | 0.678494  |
| MmugDNA.11408.1.S1_at   | SVEP1            | 0.000101776 | 0.0273437 | -1.38108  |
| MmunewRS.934.1.S1_at    | ---              | 0.00010238  | 0.0273437 | 0.720505  |
| MmugDNA.2249.1.S1_at    | LOC721400        | 0.000103558 | 0.0273437 | -0.941321 |
| MmugDNA.10743.1.S1_at   | TSC22D3          | 0.000104127 | 0.0273437 | 0.672225  |
| MmugDNA.31632.1.S1_at   | ---              | 0.000104866 | 0.0273437 | 0.709971  |
| MmugDNA.4983.1.S1_at    | LOC708451        | 0.000105138 | 0.0273437 | -0.981199 |
| MmugDNA.36333.1.S1_at   | ADAMTS9-AS1      | 0.000106022 | 0.0273437 | -0.991258 |
| MmuSTS.4424.1.S1_at     | FZD7             | 0.000106755 | 0.0273437 | 0.628578  |

|                         |                  |             |           |           |
|-------------------------|------------------|-------------|-----------|-----------|
|                         | HIST1H3D ///     |             |           |           |
|                         | LOC100425854 /// |             |           |           |
|                         | LOC100430668 /// |             |           |           |
|                         | LOC695427 ///    |             |           |           |
|                         | LOC695891 ///    |             |           |           |
|                         | LOC696204 ///    |             |           |           |
|                         | LOC698105 ///    |             |           |           |
|                         | LOC698615 ///    |             |           |           |
|                         | LOC698731 ///    |             |           |           |
|                         | LOC703889 ///    |             |           |           |
| MmuSTS.4311.1.S1_at     | LOC705220        | 0.000115073 | 0.0283635 | -1.01759  |
| MmugDNA.39168.1.S1_at   | PDGFC            | 0.00011578  | 0.0283635 | 0.712098  |
| MmugDNA.24921.1.S1_at   | ---              | 0.000116085 | 0.0283635 | -0.904407 |
| MmugDNA.28344.1.S1_s_at | LOC703270        | 0.000116347 | 0.0283635 | -1.59205  |
| MmugDNA.42756.1.S1_at   | ---              | 0.000116443 | 0.0283635 | -1.01107  |
| MmugDNA.14725.1.S1_at   | CSMD2            | 0.000117124 | 0.0283635 | -0.667748 |
|                         | LOC100506695 /// |             |           |           |
| MmugDNA.4784.1.S1_at    | PHF21B           | 0.000117352 | 0.0283635 | -0.914652 |
| MmugDNA.19488.1.S1_at   | TMEM30B          | 0.00012004  | 0.0286491 | 0.752604  |

|                         |              |             |           |           |
|-------------------------|--------------|-------------|-----------|-----------|
| MmuSTS.153.1.S1_at      | MEIS2        | 0.000120663 | 0.0286491 | 0.988713  |
| MmugDNA.12725.1.S1_at   | TMEM158      | 0.000122754 | 0.0289752 | -0.971216 |
| MmugDNA.9830.1.S1_at    | LOC717945    | 0.000124495 | 0.0291002 | -1.51123  |
| MmugDNA.18663.1.S1_at   | SLIT2        | 0.000125446 | 0.0291002 | -0.953077 |
| MmugDNA.37995.1.S1_at   | NDRG1        | 0.00012729  | 0.0291924 | -0.694085 |
| MmuSTS.4328.1.S1_x_at   | SERPINE2     | 0.000132173 | 0.0296385 | -1.39481  |
| Mmu.9527.1.S1_s_at      | LOC708206    | 0.000133862 | 0.0296874 | 1.3306    |
| MmuAffx.23.8.S1_s_at    | SERPINE2     | 0.000138437 | 0.0305343 | -1.20102  |
| MmuSTS.4328.1.S1_at     | SERPINE2     | 0.000140645 | 0.0307112 | -1.49365  |
| MmugDNA.31550.1.S1_at   | ---          | 0.000142637 | 0.0307893 | -0.599921 |
| MmugDNA.38053.1.S1_at   | TFPI2        | 0.000143733 | 0.0307893 | -2.06144  |
| MmugDNA.39955.1.S1_at   | ANK3         | 0.000143845 | 0.0307893 | 0.653421  |
| MmugDNA.6483.1.S1_at    | ---          | 0.000144933 | 0.0307893 | -0.886061 |
| MmugDNA.11064.1.S1_at   | ROGDI        | 0.000149934 | 0.0313489 | 0.620174  |
| MmuSTS.3365.1.S1_at     | ---          | 0.000150673 | 0.0313489 | -2.03562  |
| MmugDNA.385.1.S1_at     | SP4          | 0.000154865 | 0.0318276 | 0.705356  |
| Mmu.15359.1.S1_s_at     | LEPR         | 0.00015534  | 0.0318276 | 1.40491   |
| MmugDNA.31234.1.S1_at   | ABI3BP       | 0.000160619 | 0.0320671 | 1.17508   |
| MmugDNA.38084.1.S1_s_at | LOC703270    | 0.000161419 | 0.0320671 | -1.05094  |
| MmugDNA.9862.1.S1_at    | PPP1R3B      | 0.000163124 | 0.0320671 | -0.660787 |
| MmugDNA.8563.1.S1_at    | ---          | 0.000163273 | 0.0320671 | 0.759663  |
| MmugDNA.499.1.S1_at     | ---          | 0.000165306 | 0.0321616 | 0.635417  |
| MmugDNA.22341.1.S1_at   | ---          | 0.000167485 | 0.0323456 | 0.667707  |
| MmugDNA.38268.1.S1_at   | AFF3         | 0.000170045 | 0.0326837 | -1.13341  |
| MmugDNA.36279.1.S1_at   | TINAGL1      | 0.00017739  | 0.0333026 | 0.799896  |
| MmuSTS.3830.1.S1_at     | LOC718903    | 0.000180009 | 0.0334828 | -0.901807 |
| MmugDNA.22655.1.S1_at   | ACAP3        | 0.000180991 | 0.0335111 | -0.614903 |
| MmugDNA.33190.1.S1_at   | ---          | 0.000186224 | 0.0341664 | 0.679411  |
| MmugDNA.5333.1.S1_at    | TNIK         | 0.000201258 | 0.0353194 | 1.07077   |
| MmugDNA.40625.1.S1_at   | FZD7         | 0.000203153 | 0.0354976 | 0.760339  |
| MmuSTS.2715.1.S1_at     | HIST1H2BM    | 0.000204536 | 0.0355852 | -0.727722 |
| MmuSTS.1876.1.S1_at     | LOC716986    | 0.000205735 | 0.0356401 | -0.710167 |
| MmugDNA.21726.1.S1_at   | KIAA1644     | 0.000207588 | 0.035766  | 0.956731  |
| MmuSTS.2010.1.S1_at     | PCDH20       | 0.000210006 | 0.035766  | 0.92489   |
| MmugDNA.18337.1.S1_at   | LOC717705    | 0.000211746 | 0.035886  | -0.791328 |
| MmugDNA.40096.1.S1_at   | LOC711299    | 0.000214945 | 0.0361496 | 0.782598  |
| MmugDNA.13700.1.S1_at   | LOC100505963 | 0.000221859 | 0.0365999 | -0.591245 |
| MmugDNA.37942.1.S1_at   | TSPAN18      | 0.000222211 | 0.0365999 | 0.642764  |
| MmugDNA.8327.1.S1_at    | CDKL1        | 0.000224114 | 0.0366235 | 0.672994  |
| MmugDNA.27359.1.S1_at   | CDH11        | 0.000237506 | 0.0376464 | -0.893203 |
| MmugDNA.15621.1.S1_at   | LOC697171    | 0.000240611 | 0.0376464 | -1.35301  |
| MmuSTS.1486.1.S1_at     | HK2          | 0.000242372 | 0.0376464 | -1.59523  |

|                         |               |             |           |           |
|-------------------------|---------------|-------------|-----------|-----------|
| MmugDNA.29315.1.S1_at   | DEPDC1        | 0.000242543 | 0.0376464 | -1.23649  |
| MmugDNA.23575.1.S1_at   | CACHD1        | 0.000244745 | 0.0376464 | 0.793662  |
| MmunewRS.1070.1.S1_at   | ---           | 0.000245297 | 0.0376464 | -1.33036  |
| MmugDNA.16098.1.S1_at   | SCML4         | 0.000250669 | 0.0380683 | 0.68778   |
| MmuSTS.869.1.S1_at      | DYSF          | 0.000251585 | 0.0380683 | -0.664674 |
| MmugDNA.15395.1.S1_s_at | CACNA1G       | 0.00025789  | 0.0384107 | -0.690897 |
| MmugDNA.11761.1.S1_at   | GREM1         | 0.000268514 | 0.039765  | -0.65849  |
| MmugDNA.40906.1.S1_at   | DEPDC1        | 0.000268953 | 0.039765  | -0.807498 |
| MmuSTS.4111.1.S1_at     | EGF           | 0.000270516 | 0.0398088 | -0.837944 |
| MmugDNA.31327.1.S1_at   | SLIT2         | 0.00027771  | 0.0402179 | -0.750529 |
| MmugDNA.18170.1.S1_at   | LOC90499      | 0.000277956 | 0.0402179 | 1.22201   |
| MmuSTS.4379.1.S1_at     | SLC16A7       | 0.000277995 | 0.0402179 | 0.666159  |
| MmugDNA.15276.1.S1_at   | SVEP1         | 0.000280174 | 0.0403788 | -1.43474  |
| MmugDNA.34917.1.S1_at   | SPHKAP        | 0.000290119 | 0.0404243 | 1.95355   |
| MmuSTS.4834.1.S1_at     | GLI1          | 0.00029052  | 0.0404243 | 0.591908  |
| MmuSTS.442.1.S1_at      | ---           | 0.000290654 | 0.0404243 | 1.12956   |
| MmugDNA.31537.1.S1_at   | ---           | 0.000305948 | 0.0412396 | 0.97222   |
| MmugDNA.22509.1.S1_at   | LOC714408     | 0.000306513 | 0.0412396 | -0.864196 |
| MmugDNA.28597.1.S1_at   | SVEP1         | 0.00030863  | 0.0413865 | -1.57147  |
| MmugDNA.25754.1.S1_at   | ---           | 0.000317662 | 0.042248  | -1.61812  |
| MmugDNA.38084.1.S1_at   | LOC703270     | 0.000318405 | 0.042248  | -1.09579  |
| MmuSTS.4208.1.S1_at     | GCNT3         | 0.000319241 | 0.042248  | 1.30279   |
| MmugDNA.4045.1.S1_at    | THBS1         | 0.000327229 | 0.0426843 | -0.949183 |
| MmuSTS.713.1.S1_at      | ---           | 0.000329877 | 0.0426843 | -0.757415 |
| MmugDNA.40631.1.S1_at   | SEMA5A        | 0.000329941 | 0.0426843 | 0.86408   |
| MmugDNA.332.1.S1_at     | ---           | 0.000332616 | 0.0428546 | -0.741615 |
| MmugDNA.5017.1.S1_at    | MSX2          | 0.000335504 | 0.0428546 | -0.913302 |
| MmugDNA.31222.1.S1_at   | ---           | 0.000336883 | 0.042895  | 0.845641  |
| MmugDNA.5059.1.S1_at    | TGFB2         | 0.000341553 | 0.0432169 | 0.843448  |
| MmugDNA.17081.1.S1_at   | LOC708206     | 0.000351747 | 0.0438684 | 0.819921  |
| MmugDNA.23356.1.S1_at   | ABCA9         | 0.000352135 | 0.0438684 | 0.921351  |
| MmugDNA.27171.1.S1_at   | HIST1H2BB     | 0.000353809 | 0.0439413 | -1.11971  |
| MmugDNA.40349.1.S1_at   | LOC720779     | 0.000355731 | 0.0440444 | -0.782453 |
|                         | LOC714423 /// |             |           |           |
|                         | LOC722929 /// |             |           |           |
| MmugDNA.19623.1.S1_s_at | TUBB2B        | 0.000366408 | 0.0447109 | -0.930329 |
| MmuSTS.3908.1.S1_at     | SOX4          | 0.000368063 | 0.0447109 | 1.09977   |
| MmugDNA.35559.1.S1_at   | HIST1H1D      | 0.000368095 | 0.0447109 | -0.651577 |
| MmuSTS.3598.1.S1_s_at   | CSPG5         | 0.000368988 | 0.0447109 | -0.849863 |
| MmugDNA.26190.1.S1_at   | ---           | 0.000370329 | 0.0447109 | -0.714888 |
| MmugDNA.36784.1.S1_at   | ZNF711        | 0.000370838 | 0.0447109 | -0.652785 |
| MmugDNA.5012.1.S1_at    | L3MBTL4       | 0.000372191 | 0.0447109 | 0.636263  |

|                         |                  |             |           |           |
|-------------------------|------------------|-------------|-----------|-----------|
| MmugDNA.11096.1.S1_at   | ADAMTS17         | 0.000375343 | 0.0449558 | -0.633248 |
| MmugDNA.5710.1.S1_at    | FAM59A           | 0.000380207 | 0.0454037 | -0.611937 |
| MmugDNA.4044.1.S1_at    | THBS1            | 0.000387016 | 0.0460804 | -0.74082  |
| MmuSTS.4270.1.S1_at     | GRPR             | 0.000393756 | 0.0463362 | -1.47925  |
| MmugDNA.33527.1.S1_s_at | ---              | 0.000397024 | 0.0465849 | 0.814972  |
| Mmu.6061.1.S1_at        | GRPR             | 0.000406893 | 0.047134  | -1.90095  |
| MmuSTS.3429.1.S1_at     | COL12A1          | 0.000407542 | 0.047134  | -1.28148  |
| MmugDNA.42676.1.S1_at   | ---              | 0.000412788 | 0.0473337 | 1.05643   |
|                         | HIST1H3D ///     |             |           |           |
|                         | LOC100425854 /// |             |           |           |
|                         | LOC100430668 /// |             |           |           |
|                         | LOC695427 ///    |             |           |           |
|                         | LOC695891 ///    |             |           |           |
|                         | LOC696204 ///    |             |           |           |
|                         | LOC698105 ///    |             |           |           |
|                         | LOC698615 ///    |             |           |           |
|                         | LOC698731 ///    |             |           |           |
|                         | LOC703889 ///    |             |           |           |
| MmugDNA.1027.1.S1_at    | LOC705220        | 0.000416811 | 0.0476521 | -0.826276 |
| MmugDNA.21403.1.S1_at   | CDCA3            | 0.000426002 | 0.0481819 | -0.753443 |
| MmugDNA.39756.1.S1_at   | ANK2             | 0.000426153 | 0.0481819 | -0.600236 |
| MmugDNA.18146.1.S1_at   | ---              | 0.000432154 | 0.0484715 | -0.589089 |
| Mmu.6061.1.A1_at        | ---              | 0.000433272 | 0.0484715 | -1.83163  |
| MmugDNA.28048.1.S1_at   | ---              | 0.000433518 | 0.0484715 | 1.13756   |
| MmugDNA.24399.1.S1_at   | PTGIS            | 0.000435054 | 0.048486  | 1.80307   |
|                         | HIST1H3D ///     |             |           |           |
|                         | LOC100425854 /// |             |           |           |
|                         | LOC100430668 /// |             |           |           |
|                         | LOC695427 ///    |             |           |           |
|                         | LOC695891 ///    |             |           |           |
|                         | LOC696204 ///    |             |           |           |
|                         | LOC698105 ///    |             |           |           |
|                         | LOC698615 ///    |             |           |           |
|                         | LOC698731 ///    |             |           |           |
|                         | LOC703889 ///    |             |           |           |
| MmuSTS.662.1.S1_at      | LOC705220        | 0.000439401 | 0.0486264 | -0.599133 |
| MmugDNA.8073.1.S1_at    | CDC25C           | 0.000439721 | 0.0486264 | -0.636907 |

|                         |                  |             |           |           |
|-------------------------|------------------|-------------|-----------|-----------|
|                         | HIST1H3D ///     |             |           |           |
|                         | LOC100425854 /// |             |           |           |
|                         | LOC100430668 /// |             |           |           |
|                         | LOC695427 ///    |             |           |           |
|                         | LOC695891 ///    |             |           |           |
|                         | LOC696204 ///    |             |           |           |
|                         | LOC698105 ///    |             |           |           |
|                         | LOC698615 ///    |             |           |           |
|                         | LOC698731 ///    |             |           |           |
|                         | LOC703889 ///    |             |           |           |
| MmugDNA.29213.1.S1_at   | LOC705220        | 0.000449867 | 0.0493427 | -0.890637 |
| MmugDNA.11432.1.S1_at   | ADAM12           | 0.000462908 | 0.0502929 | -1.62543  |
| MmugDNA.4985.1.S1_at    | LOC708451        | 0.00046466  | 0.0502929 | -0.948889 |
| MmugDNA.36519.1.S1_at   | SYTL4            | 0.000470643 | 0.0504412 | -0.92667  |
| Mmu.11820.13.S1_a_at    | SERPINE2         | 0.000475082 | 0.0505536 | -1.39658  |
| MmugDNA.24420.1.S1_at   | LOC719468        | 0.000480334 | 0.0507951 | -0.647139 |
| MmugDNA.20110.1.S1_at   | MERTK            | 0.000480726 | 0.0507951 | 0.622244  |
| MmugDNA.20852.1.S1_at   | CADPS            | 0.000484723 | 0.0509506 | -1.78606  |
| MmugDNA.38304.1.S1_at   | GPR157           | 0.000487158 | 0.0510495 | -1.07783  |
| MmugDNA.19399.1.S1_at   | FAM113B          | 0.000488373 | 0.0510495 | 0.705869  |
| MmugDNA.38558.1.S1_at   | PEG10            | 0.000489685 | 0.0510495 | -1.83337  |
| MmugDNA.27171.1.S1_x_at | HIST1H2BB        | 0.000490723 | 0.0510495 | -1.06131  |
| MmugDNA.21658.1.S1_at   | FGF11            | 0.000496937 | 0.0512387 | -0.638011 |
| MmuSTS.2360.1.S1_at     | S100A1           | 0.000497619 | 0.0512387 | 1.13075   |
| MmugDNA.24334.1.S1_at   | RNF207           | 0.000499057 | 0.051256  | 0.639941  |
| MmugDNA.15512.1.S1_s_at | GLRB             | 0.000505277 | 0.0516191 | -1.26408  |
| MmuSTS.4445.1.S1_at     | LOC702153        | 0.000507196 | 0.0516191 | -1.91222  |
| MmugDNA.13626.1.S1_at   | PTGIS            | 0.000507708 | 0.0516191 | 1.5099    |
| MmugDNA.32604.1.S1_at   | LOC713186        | 0.000511102 | 0.0516463 | -0.825282 |
| MmugDNA.7255.1.S1_at    | ---              | 0.000512927 | 0.0516463 | -0.898006 |
| MmugDNA.2568.1.S1_at    | ADAM12           | 0.000521204 | 0.0522887 | -1.45403  |
| MmugDNA.3377.1.S1_at    | ---              | 0.000522066 | 0.0522887 | -0.854811 |
| MmugDNA.30662.1.S1_at   | CACNA1G          | 0.000528349 | 0.052712  | -1.35944  |
| MmugDNA.30040.1.S1_at   | CPXM2            | 0.000531213 | 0.052712  | -0.651162 |



|                         |                  |             |           |           |
|-------------------------|------------------|-------------|-----------|-----------|
|                         | HIST1H4B ///     |             |           |           |
|                         | HIST1H4C ///     |             |           |           |
|                         | HIST1H4D ///     |             |           |           |
|                         | HIST1H4E ///     |             |           |           |
|                         | HIST1H4F ///     |             |           |           |
|                         | HIST1H4H ///     |             |           |           |
|                         | HIST1H4I ///     |             |           |           |
|                         | HIST1H4J ///     |             |           |           |
|                         | HIST1H4K ///     |             |           |           |
|                         | HIST1H4L ///     |             |           |           |
|                         | HIST2H4A ///     |             |           |           |
|                         | HIST2H4B ///     |             |           |           |
| MmugDNA.17835.1.S1_at   | HIST4H4          | 0.000535458 | 0.0529727 | -0.64261  |
| MmuSTS.2710.1.S1_at     | ---              | 0.000538103 | 0.053086  | -1.53821  |
| MmugDNA.603.1.S1_at     | RCN3             | 0.000541864 | 0.053086  | -0.801794 |
| MmugDNA.29582.1.S1_at   | MRPS12           | 0.000547762 | 0.0534046 | 0.743585  |
| MmugDNA.3428.1.S1_at    | SGOL2            | 0.000559138 | 0.0540441 | -0.967286 |
| MmugDNA.327.1.S1_at     | ---              | 0.000561201 | 0.0540441 | -0.659432 |
|                         | LOC100428470 /// |             |           |           |
| MmugDNA.20569.1.S1_at   | LOC703527        | 0.000562753 | 0.0540441 | 0.974299  |
| MmugDNA.5017.1.S1_s_at  | MSX2             | 0.000565033 | 0.0540441 | -1.0585   |
| MmuSTS.3996.1.S1_s_at   | TGFB2            | 0.000567467 | 0.0541354 | 0.92841   |
| MmuSTS.3973.1.S1_at     | CTSK             | 0.000570011 | 0.0541354 | 1.14137   |
| MmugDNA.29748.1.S1_at   | MMP23B           | 0.000578605 | 0.054349  | -0.75254  |
| MmugDNA.23735.1.S1_at   | ---              | 0.00057943  | 0.054349  | -0.754358 |
| MmuSTS.3275.1.S1_at     | RRM2             | 0.000582563 | 0.054349  | -1.21088  |
| MmugDNA.5604.1.S1_at    | LOC100130175     | 0.000590214 | 0.054349  | 0.830963  |
| Mmu.5677.4.S1_at        | LEPR             | 0.000597355 | 0.054349  | 1.24145   |
| MmugDNA.19147.1.S1_at   | ---              | 0.000602136 | 0.054349  | 0.701566  |
| MmugDNA.42829.1.S1_s_at | TMEM54           | 0.000602669 | 0.054349  | -0.70128  |
| MmugDNA.17143.1.S1_x_at | LOC697469        | 0.000603229 | 0.054349  | -0.663403 |
| MmugDNA.28136.1.S1_at   | LOX              | 0.000609246 | 0.0546564 | -1.22086  |
| MmugDNA.23860.1.S1_at   | LOC697857        | 0.000610027 | 0.0546564 | -0.586348 |
| MmugDNA.20245.1.S1_at   | ---              | 0.000610704 | 0.0546564 | 0.808582  |
| MmugDNA.3990.1.S1_at    | SFN              | 0.000617279 | 0.0548991 | -0.743154 |
| MmugDNA.43193.1.S1_at   | LEPR             | 0.000629302 | 0.0553474 | 1.39595   |
| MmuSTS.1433.1.S1_at     | KRT2             | 0.000634332 | 0.0555396 | -3.57736  |
| MmugDNA.7448.1.S1_at    | NEIL3            | 0.00064313  | 0.0558255 | -1.03772  |
| MmuSTS.3432.1.S1_at     | COL1A2           | 0.000647236 | 0.0558832 | -1.4757   |
| MmugDNA.32413.1.S1_at   | KIF18A           | 0.000647376 | 0.0558832 | -0.971038 |
| MmugDNA.5488.1.S1_at    | DHRS3            | 0.000649121 | 0.0558832 | 0.884667  |
| MmuSTS.1928.1.S1_at     | LOC712321        | 0.000652401 | 0.0558832 | -1.20367  |
| MmugDNA.32918.1.S1_at   | COL12A1          | 0.000656255 | 0.0558832 | -1.22947  |
| MmugDNA.9766.1.S1_at    | FAM189A2         | 0.000667838 | 0.0564854 | 1.00068   |

|                         |                  |             |           |           |
|-------------------------|------------------|-------------|-----------|-----------|
| MmugDNA.26953.1.S1_at   | ---              | 0.00067154  | 0.0564854 | -0.744775 |
| MmugDNA.42149.1.S1_at   | SESTD1           | 0.000672383 | 0.0564854 | 0.647426  |
| MmugDNA.9563.1.S1_at    | STON1-GTF2A1L    | 0.000676561 | 0.0564854 | 0.7013    |
| MmuSTS.4406.1.S1_at     | LOC722009        | 0.000678836 | 0.0564854 | -1.42228  |
| MmuSTS.1633.1.S1_at     | ---              | 0.000679168 | 0.0564854 | 0.773381  |
| MmugDNA.18070.1.S1_at   | KLF9             | 0.000681473 | 0.0564854 | 0.847876  |
| MmugDNA.41205.1.S1_at   | CPXM2            | 0.000685378 | 0.0566373 | -1.01389  |
| MmugDNA.4055.1.S1_at    | PTGIS            | 0.000689162 | 0.0566373 | 1.20974   |
| MmugDNA.40278.1.S1_at   | LOC712321        | 0.000689491 | 0.0566373 | -1.08     |
| MmugDNA.22274.1.S1_at   | LOC100423631     | 0.000692699 | 0.0566373 | -1.00874  |
| Mmu.13746.1.S1_at       | CCL25            | 0.000704626 | 0.0572255 | -1.17257  |
| MmugDNA.18785.1.S1_at   | LOC100426120     | 0.000715783 | 0.0573773 | -1.14246  |
| MmuSTS.910.1.S1_at      | ETNK2            | 0.000716193 | 0.0573773 | 0.696632  |
| MmugDNA.40338.1.S1_s_at | LOC722009        | 0.000718425 | 0.0573773 | -1.35335  |
| MmugDNA.41470.1.S1_at   | ---              | 0.000727681 | 0.0573773 | -0.678778 |
| MmugDNA.36621.1.S1_s_at | TTR              | 0.000729075 | 0.0573773 | 0.901571  |
| MmugDNA.27249.1.S1_at   | BEND7            | 0.000733824 | 0.0573773 | 0.811214  |
| MmugDNA.17972.1.S1_at   | ---              | 0.000735207 | 0.0573773 | -0.980341 |
| MmugDNA.9557.1.S1_s_at  | GABARAPL1        | 0.000738044 | 0.0573773 | 0.636243  |
| MmugDNA.24837.1.S1_s_at | LOC714602        | 0.000738618 | 0.0573773 | -0.928613 |
| MmugDNA.8731.1.S1_at    | COL12A1          | 0.000740537 | 0.0573773 | -0.792456 |
| MmugDNA.18305.1.S1_at   | ---              | 0.000740613 | 0.0573773 | 0.690295  |
| MmunewRS.250.1.S1_at    | ---              | 0.00074679  | 0.0575909 | -0.649206 |
|                         | HIST1H3D ///     |             |           |           |
|                         | LOC100425854 /// |             |           |           |
|                         | LOC100430668 /// |             |           |           |
|                         | LOC695427 ///    |             |           |           |
|                         | LOC695891 ///    |             |           |           |
|                         | LOC696204 ///    |             |           |           |
|                         | LOC698105 ///    |             |           |           |
|                         | LOC698615 ///    |             |           |           |
|                         | LOC698731 ///    |             |           |           |
|                         | LOC703889 ///    |             |           |           |
| MmugDNA.2184.1.S1_at    | LOC705220        | 0.000748853 | 0.0575909 | -1.10137  |
| MmugDNA.2768.1.S1_at    | NUF2             | 0.000749077 | 0.0575909 | -0.9022   |
| MmugDNA.26374.1.S1_at   | ---              | 0.000754301 | 0.0576185 | 1.23761   |
| MmugDNA.24894.1.S1_at   | LOC703527        | 0.000755426 | 0.0576185 | 0.666864  |
| MmuSTS.4094.1.S1_at     | EDNRB            | 0.000756573 | 0.0576185 | -0.73411  |
| MmugDNA.5533.1.S1_at    | CDH11            | 0.000766144 | 0.058128  | -0.984225 |
| MmuSTS.2742.1.S1_at     | ADAMTS9          | 0.000774656 | 0.0582967 | -0.762334 |
| MmugDNA.20442.1.S1_at   | SEMA6A           | 0.000775133 | 0.0582967 | 0.828884  |
| MmuSTS.713.1.S1_x_at    | ---              | 0.000775954 | 0.0582967 | -0.646125 |
| MmuSTS.2698.1.S1_at     | HIST1H2BH        | 0.000777599 | 0.0582967 | -0.589309 |

|                         |            |             |           |           |
|-------------------------|------------|-------------|-----------|-----------|
| MmugDNA.14736.1.S1_at   | ADAMTS9    | 0.00079941  | 0.0588811 | -0.650244 |
| MmugDNA.2760.1.S1_at    | SOX4       | 0.000811771 | 0.059466  | 0.890747  |
| MmuSTS.2497.1.S1_at     | GPX2       | 0.000816711 | 0.0597195 | 0.851729  |
| MmugDNA.10186.1.S1_at   | CASC5      | 0.000822207 | 0.0600098 | -0.986009 |
| MmuSTS.3220.1.S1_at     | MYBL1      | 0.000855254 | 0.0612922 | -0.818654 |
| MmugDNA.29002.1.S1_at   | LOC710290  | 0.000859478 | 0.0612922 | 0.678465  |
| MmugDNA.9906.1.S1_at    | HIST1H1B   | 0.000878323 | 0.0618529 | -0.876251 |
| MmugDNA.31894.1.S1_at   | TXNIP      | 0.000883137 | 0.0618529 | 0.676827  |
| MmugDNA.15302.1.S1_s_at | FAM162A    | 0.000892207 | 0.0621976 | -0.624666 |
| MmugDNA.20575.1.S1_at   | AFF3       | 0.000906091 | 0.06284   | -0.852282 |
| MmugDNA.2512.1.S1_at    | LOC695836  | 0.000912513 | 0.0629929 | -0.697385 |
| MmugDNA.15212.1.S1_at   | ---        | 0.000914539 | 0.0629929 | -1.12006  |
| MmugDNA.37113.1.S1_at   | LOC709063  | 0.000921238 | 0.0632385 | 1.08435   |
| MmugDNA.14959.1.S1_at   | CDK1       | 0.000931151 | 0.0634871 | -0.934459 |
| MmuSTS.799.1.S1_at      | ---        | 0.000954585 | 0.0644318 | 1.46139   |
| MmugDNA.31405.1.S1_at   | LOC700889  | 0.000956235 | 0.0644355 | -0.739129 |
| Mmu.12129.1.S1_at       | ---        | 0.000958282 | 0.0644429 | -0.720248 |
| MmugDNA.5830.1.S1_at    | TMOD1      | 0.000966801 | 0.0644429 | 0.588521  |
| MmugDNA.11735.1.S1_at   | DDX58      | 0.000970433 | 0.0644429 | -0.828727 |
| Mmu.7507.2.S1_at        | TXNIP      | 0.000972544 | 0.0644429 | 0.695523  |
| MmugDNA.11557.1.S1_at   | NCAPG      | 0.000977232 | 0.0644515 | -0.68456  |
| MmuSTS.1354.1.S1_at     | ---        | 0.000982831 | 0.0647151 | 0.641361  |
| MmugDNA.4046.1.S1_at    | THBS1      | 0.000991363 | 0.0647225 | -1.06143  |
| MmugDNA.15512.1.S1_at   | GLRB       | 0.000999584 | 0.0647225 | -1.17623  |
| MmuSTS.2105.1.S1_s_at   | ---        | 0.00101606  | 0.0652258 | -0.624288 |
| MmugDNA.26848.1.S1_s_at | FGFR2      | 0.00101654  | 0.0652258 | 0.595821  |
| MmugDNA.40939.1.S1_at   | ---        | 0.00103157  | 0.065882  | -0.771343 |
| MmugDNA.8896.1.S1_at    | FOXN1      | 0.0010452   | 0.0664371 | -0.964724 |
| Mmu.14060.1.A1_at       | COL1A1     | 0.00106882  | 0.0671055 | -1.39337  |
| MmugDNA.30184.1.S1_at   | MMP14      | 0.00109664  | 0.0684871 | 0.768775  |
| MmugDNA.27645.1.S1_at   | LOC710801  | 0.00109781  | 0.0684871 | 1.7907    |
| MmugDNA.41390.1.S1_at   | ---        | 0.00110399  | 0.0686659 | 0.859766  |
| MmugDNA.40336.1.S1_at   | LOC722009  | 0.00113812  | 0.069946  | -1.35684  |
| MmugDNA.37112.1.S1_at   | ZNF330     | 0.00113852  | 0.069946  | -0.661113 |
| MmugDNA.3319.1.S1_at    | PCED1B-AS1 | 0.0011499   | 0.0703239 | 0.599198  |
| MmugDNA.27403.1.S1_at   | SELE       | 0.00115891  | 0.0704608 | -0.982969 |
| MmugDNA.18070.1.S1_s_at | KLF9       | 0.00118402  | 0.0712234 | 0.938807  |
| MmugDNA.21026.1.S1_at   | TCERG1L    | 0.00119257  | 0.0714184 | -1.07201  |
| MmugDNA.17909.1.S1_at   | OMD        | 0.00121009  | 0.0717975 | 0.965376  |
| MmugDNA.31043.1.S1_at   | CABLES1    | 0.00121303  | 0.0717975 | 0.751027  |
| MmuSTS.440.1.S1_at      | AGTR2      | 0.0012132   | 0.0717975 | -0.944244 |
| MmugDNA.27864.1.S1_at   | COL12A1    | 0.00122671  | 0.0722675 | -1.10192  |

|                         |                              |            |           |           |
|-------------------------|------------------------------|------------|-----------|-----------|
| MmugDNA.8928.1.S1_at    | ---                          | 0.00124115 | 0.0723339 | -0.72691  |
| MmugDNA.11424.1.S1_at   | NFASC                        | 0.00125974 | 0.072847  | 0.848633  |
| MmugDNA.41711.1.S1_at   | ---                          | 0.001268   | 0.072929  | 0.683973  |
| MmugDNA.25691.1.S1_at   | SLC16A6                      | 0.00128254 | 0.0730225 | -0.645158 |
| MmugDNA.41094.1.S1_at   | CYP4F22                      | 0.00129878 | 0.0734219 | -0.730705 |
| MmugDNA.29740.1.S1_at   | ---                          | 0.00130365 | 0.0735937 | 0.66087   |
| MmugDNA.36465.1.S1_s_at | LOC709119<br>KRT14 ///       | 0.0013118  | 0.0738474 | -1.11769  |
| MmugDNA.23448.1.S1_at   | LOC707236                    | 0.00132412 | 0.0741274 | -0.859557 |
| MmuSTS.1507.1.S1_at     | MMP14                        | 0.00134963 | 0.0749204 | 0.684717  |
| MmuSTS.1579.1.S1_at     | IFIT1                        | 0.00135104 | 0.0749204 | -0.897807 |
| MmugDNA.25696.1.S1_at   | NEK2                         | 0.00135326 | 0.0749204 | -0.63182  |
| MmugDNA.21912.1.S1_at   | SOX9                         | 0.00135763 | 0.0749204 | 1.27589   |
| MmugDNA.31894.1.S1_s_at | TXNIP                        | 0.00135979 | 0.0749204 | 0.639547  |
| MmuSTS.4828.1.S1_at     | GFI1                         | 0.00136437 | 0.0749204 | 0.664853  |
| MmugDNA.4606.1.S1_at    | MYLK-AS1<br>LOC100426949 /// | 0.00136535 | 0.0749204 | 0.632203  |
|                         | LOC714423 ///                |            |           |           |
| MmugDNA.19623.1.S1_at   | TUBB2B                       | 0.00137314 | 0.075203  | -0.7356   |
| MmugDNA.19950.1.S1_at   | THSD7A                       | 0.00137956 | 0.0753497 | 0.958847  |
| MmuSTS.912.1.S1_at      | ---                          | 0.0014087  | 0.0756793 | 1.70811   |
| MmugDNA.43588.1.S1_at   | CENPW                        | 0.00140881 | 0.0756793 | -0.888355 |
| MmuSTS.355.1.S1_at      | ---                          | 0.00140881 | 0.0756793 | 1.03772   |
| MmugDNA.18357.1.S1_at   | ORC6L                        | 0.00141825 | 0.0756793 | -0.594941 |
| MmuSTS.3388.1.S1_at     | PAPPA2                       | 0.00142969 | 0.0756793 | -0.612815 |
| MmugDNA.41431.1.S1_at   | TFCP2L1                      | 0.00143019 | 0.0756793 | 1.6767    |
| MmugDNA.22787.1.S1_at   | UBE2T                        | 0.00143187 | 0.0756793 | -0.647575 |
| MmugDNA.33139.1.S1_at   | NEFM                         | 0.00143246 | 0.0756793 | -0.798426 |
| MmugDNA.17854.1.S1_at   | NTRK3                        | 0.00145723 | 0.076388  | 0.714077  |
| MmunewRS.830.1.S1_at    | ---                          | 0.00147856 | 0.0771052 | 1.00885   |
| MmugDNA.25.1.S1_at      | ABHD2                        | 0.00150143 | 0.0776959 | 0.609483  |
| MmugDNA.36138.1.S1_at   | CAMK2D                       | 0.0015169  | 0.0777983 | -0.652133 |
| MmuSTS.3217.1.S1_at     | SDC4                         | 0.00152435 | 0.0780808 | 0.598505  |
| MmugDNA.33915.1.S1_at   | LOC715820                    | 0.00153637 | 0.0782992 | -0.898457 |
| MmunewRS.702.1.S1_s_at  | FOXA1                        | 0.00155965 | 0.0785884 | 1.2778    |
| MmugDNA.23517.1.S1_at   | FAM65C                       | 0.00156036 | 0.0785884 | -0.737915 |

|                         |                  |            |           |           |
|-------------------------|------------------|------------|-----------|-----------|
|                         | HIST1H3D ///     |            |           |           |
|                         | LOC100425854 /// |            |           |           |
|                         | LOC100430668 /// |            |           |           |
|                         | LOC695427 ///    |            |           |           |
|                         | LOC695891 ///    |            |           |           |
|                         | LOC696204 ///    |            |           |           |
|                         | LOC698105 ///    |            |           |           |
|                         | LOC698615 ///    |            |           |           |
|                         | LOC698731 ///    |            |           |           |
|                         | LOC703889 ///    |            |           |           |
| MmuSTS.4310.1.S1_at     | LOC705220        | 0.00158549 | 0.0790375 | -0.91714  |
| MmugDNA.749.1.S1_at     | KLHL24           | 0.0015912  | 0.0790375 | 0.760946  |
| MmuSTS.4796.1.S1_at     | FMO4             | 0.00159218 | 0.0790375 | -0.691341 |
| MmugDNA.37743.1.S1_at   | PDGFC            | 0.00159393 | 0.0790375 | 0.625959  |
| MmugDNA.43348.1.S1_at   | SGOL2            | 0.00162034 | 0.0796575 | -0.938408 |
| MmuSTS.3607.1.S1_at     | CDH11            | 0.00162927 | 0.0796575 | -0.965637 |
| MmugDNA.2946.1.S1_at    | ---              | 0.00162964 | 0.0796575 | 0.592564  |
| MmuSTS.4722.1.S1_at     | TRIP13           | 0.00163053 | 0.0796575 | -0.632785 |
| MmugDNA.451.1.S1_at     | ---              | 0.00163209 | 0.0796575 | -1.09014  |
| MmugDNA.14519.1.S1_s_at | LEPR             | 0.0016394  | 0.0796997 | 1.31305   |
| MmuSTS.1558.1.S1_at     | MELK             | 0.00164283 | 0.0796997 | -0.836396 |
| MmunewRS.671.1.S1_at    | ---              | 0.00164558 | 0.0797241 | -1.03836  |
| MmugDNA.31881.1.S1_at   | ---              | 0.0016552  | 0.0797241 | 0.738607  |
| MmugDNA.1162.1.S1_at    | MARCKSL1         | 0.00166832 | 0.0797241 | 0.696583  |
| MmugDNA.36465.1.S1_at   | LOC709119        | 0.00166909 | 0.0797241 | -1.07498  |
| MmugDNA.24178.1.S1_at   | ---              | 0.00168622 | 0.0799782 | 1.53132   |
| MmugDNA.26358.1.S1_at   | HIST1H2AK        | 0.00169124 | 0.0800282 | -0.78807  |
| MmugDNA.3222.1.S1_at    | ---              | 0.00170323 | 0.080199  | 0.61963   |
| MmugDNA.33823.1.S1_s_at | KIAA0101         | 0.00170478 | 0.080199  | -1.31444  |
| MmugDNA.24523.1.S1_at   | CDCA2            | 0.00171603 | 0.0803715 | -0.741312 |
| MmugDNA.38818.1.S1_at   | LOC699977        | 0.00172711 | 0.0804988 | 0.748832  |
| MmugDNA.2395.1.S1_at    | PLOD2            | 0.00172994 | 0.0805253 | -0.841849 |
| MmuAffx.161.1.S1_at     | ---              | 0.00175919 | 0.0809109 | 1.25386   |
| MmuSTS.644.1.S1_at      | SDHD             | 0.00176061 | 0.0809109 | -0.665322 |
| MmugDNA.821.1.S1_at     | KATNAL2          | 0.00176078 | 0.0809109 | -1.36992  |
| MmugDNA.14253.1.S1_at   | ---              | 0.00176433 | 0.0809109 | -0.76823  |
| MmuSTS.4231.1.S1_at     | ---              | 0.00176803 | 0.0809109 | -1.3513   |
| MmugDNA.27683.1.S1_at   | ADAMTS2          | 0.00179433 | 0.0815744 | -1.18099  |
| MmugDNA.2848.1.S1_at    | LOC703270        | 0.00179483 | 0.0815744 | -0.593111 |
| Mmu.14519.1.S1_at       | CTSK             | 0.00179667 | 0.0815744 | 1.09586   |
| MmugDNA.15700.1.S1_s_at | PHGDH            | 0.00181508 | 0.0819491 | -0.877387 |
| MmuSTS.3431.1.S1_at     | ---              | 0.00184415 | 0.0827069 | -1.09508  |
| MmugDNA.9557.1.S1_at    | GABARAPL1        | 0.00185632 | 0.0829759 | 0.592495  |

|                         |                              |            |           |           |
|-------------------------|------------------------------|------------|-----------|-----------|
| MmugDNA.22170.1.S1_at   | CTHRC1                       | 0.00186226 | 0.0831141 | 1.43498   |
| MmuSTS.3242.1.S1_at     | LOC100426120                 | 0.00187709 | 0.0835344 | -1.14275  |
| MmugDNA.9079.1.S1_at    | C20orf46<br>LOC100423631 /// | 0.00189146 | 0.0836259 | -0.733846 |
| MmugDNA.24380.1.S1_at   | VCAN                         | 0.00189612 | 0.0836259 | -1.20502  |
| MmugDNA.24040.1.S1_at   | ---                          | 0.00195474 | 0.0850641 | 2.0068    |
| MmugDNA.22333.1.S1_at   | ---                          | 0.0019556  | 0.0850641 | -0.741884 |
| MmugDNA.14881.1.S1_at   | ---                          | 0.0019707  | 0.085165  | 0.892469  |
| MmugDNA.25731.1.S1_at   | TGFB2                        | 0.00197491 | 0.0851943 | 0.806475  |
| MmugDNA.7650.1.S1_at    | AGTR2                        | 0.00198337 | 0.0853468 | -0.658581 |
| Mmu.666.1.S1_at         | KCNJ2                        | 0.00201033 | 0.0858664 | 0.733645  |
| MmugDNA.37123.1.S1_at   | LIPA                         | 0.00202062 | 0.0858817 | -0.637094 |
| MmugDNA.18490.1.S1_at   | TSPAN18                      | 0.00202208 | 0.0858817 | 0.659     |
| MmuSTS.2263.1.S1_at     | LOC712795                    | 0.00203154 | 0.0858817 | 0.977198  |
| MmugDNA.5485.1.S1_at    | SDPR                         | 0.00203197 | 0.0858817 | 0.595461  |
| MmuSTS.1939.1.S1_at     | FGF11                        | 0.00203697 | 0.0859276 | -0.957264 |
| MmuSTS.1392.1.S1_at     | KCNJ2                        | 0.00207043 | 0.0866237 | 0.662678  |
| MmugDNA.8743.1.S1_at    | NUAK1                        | 0.00208625 | 0.0867631 | 0.618394  |
| MmugDNA.1894.1.S1_s_at  | TRPM2                        | 0.00209379 | 0.0867631 | -0.637617 |
| MmugDNA.30940.1.S1_at   | LOC696907                    | 0.00210486 | 0.0868903 | -0.617864 |
| MmugDNA.33495.1.S1_at   | WDR72                        | 0.00210534 | 0.0868903 | 2.70313   |
| MmugDNA.19189.1.S1_at   | DDX58                        | 0.00211339 | 0.0871331 | -0.678592 |
| MmugDNA.20568.1.S1_s_at | ITGB1                        | 0.00211601 | 0.0871522 | 0.602168  |
| MmugDNA.31369.1.S1_at   | RRM2                         | 0.00212094 | 0.0872664 | -1.15713  |
| MmugDNA.37382.1.S1_s_at | ---                          | 0.00216588 | 0.0878181 | 1.28155   |
| MmugDNA.39472.1.S1_at   | CYR61                        | 0.00217805 | 0.0879103 | -0.692584 |
| MmuSTS.1748.1.S1_at     | RNF152                       | 0.00218015 | 0.0879103 | 1.04716   |
| MmugDNA.703.1.S1_at     | CA2                          | 0.0022252  | 0.0890152 | -1.86786  |
| MmugDNA.41853.1.S1_at   | FOXN1                        | 0.00223123 | 0.0890776 | -1.278    |
| MmugDNA.2024.1.S1_at    | ---                          | 0.0022501  | 0.0891621 | 0.731214  |
| MmuSTS.2257.1.S1_at     | CRYGS /// TBCCD1             | 0.00225086 | 0.0891621 | -2.10965  |
| MmugDNA.289.1.S1_at     | ARMC3                        | 0.00225905 | 0.0892199 | -0.646846 |
| MmugDNA.15862.1.S1_at   | CKS2                         | 0.00227477 | 0.0894904 | -0.613694 |
| MmugDNA.41865.1.S1_at   | PCOLCE                       | 0.00228394 | 0.0895893 | -1.22645  |
| MmugDNA.40688.1.S1_at   | ZNF235                       | 0.00229758 | 0.0899033 | 0.593099  |
| MmugDNA.36643.1.S1_at   | PELI2                        | 0.00230487 | 0.0899966 | 0.591614  |
| MmugDNA.10668.1.S1_at   | KLK2 /// KLK3                | 0.0023057  | 0.0899966 | 1.78624   |
| MmugDNA.35863.1.S1_at   | LOC704204                    | 0.00231001 | 0.0899996 | -1.63698  |
| MmugDNA.37076.1.S1_at   | DPYSL3                       | 0.00231508 | 0.0900712 | 0.889698  |
| MmugDNA.43116.1.S1_at   | GPNMB                        | 0.00233166 | 0.090363  | 0.72993   |
| MmugDNA.14738.1.S1_at   | ---                          | 0.00237524 | 0.0910868 | 0.802303  |
| MmugDNA.8941.1.S1_at    | ---                          | 0.00239317 | 0.0913995 | 0.897512  |

|                        |                  |            |           |           |
|------------------------|------------------|------------|-----------|-----------|
| MmugDNA.3801.1.S1_at   | WDR72            | 0.00240357 | 0.0913995 | 2.65698   |
| MmugDNA.27976.1.S1_at  | LOC716250        | 0.00240922 | 0.0913995 | 1.06608   |
| MmugDNA.8354.1.S1_at   | PIK3IP1          | 0.00241486 | 0.0914368 | 0.864946  |
| MmugDNA.42834.1.S1_at  | ---              | 0.00242116 | 0.0915039 | -0.617935 |
| MmugDNA.189.1.S1_at    | IGFBP5           | 0.00243394 | 0.0917291 | -0.728992 |
| MmugDNA.36979.1.S1_at  | SLITRK6          | 0.00244532 | 0.0919864 | -0.714558 |
| MmugDNA.13969.1.S1_at  | WDR72            | 0.00245308 | 0.0921923 | 2.54086   |
| MmugDNA.12625.1.S1_at  | RASGRF2          | 0.00245756 | 0.0922067 | 0.803289  |
| MmugDNA.24910.1.S1_at  | NTRK3            | 0.00247761 | 0.0924604 | 1.14772   |
| MmugDNA.12230.1.S1_at  | XPR1             | 0.00252336 | 0.0928603 | 0.723905  |
| MmugDNA.22231.1.S1_at  | UPK1A            | 0.00253759 | 0.0930297 | 0.766883  |
| MmugDNA.24544.1.S1_at  | KLHL24           | 0.00254247 | 0.0930775 | 0.72936   |
| MmugDNA.22373.1.S1_at  | CPEB1            | 0.00254954 | 0.0932137 | 0.695327  |
| MmugDNA.42853.1.S1_at  | FGFR2            | 0.00255243 | 0.093235  | 0.591669  |
| MmugDNA.21142.1.S1_at  | LTBP1            | 0.00258349 | 0.093967  | 0.585986  |
| MmugDNA.38667.1.S1_at  | THRB             | 0.00258645 | 0.0939674 | 0.788795  |
| MmugDNA.36864.1.S1_at  | SPAG17           | 0.00260297 | 0.0943127 | -0.920035 |
| MmuSTS.2870.1.S1_at    | EPCAM            | 0.00260841 | 0.0943212 | 0.957736  |
| MmuSTS.3438.1.S1_at    | ANK2             | 0.00261469 | 0.0943212 | -0.839478 |
| MmugDNA.42675.1.S1_at  | TGFB2            | 0.00262218 | 0.0943849 | 0.800604  |
| MmugDNA.24835.1.S1_at  | LOC100423631 /// |            |           |           |
|                        | VCAN             | 0.00262311 | 0.0943849 | -1.20003  |
|                        | LOC707320 ///    |            |           |           |
| MmugDNA.25384.1.S1_at  | UBE2C            | 0.0026237  | 0.0943849 | -0.928898 |
| Mmu.9771.1.S1_at       | OMD              | 0.00265061 | 0.0946791 | 1.08645   |
| MmuSTS.2940.1.S1_at    | ABCA6            | 0.00265876 | 0.0948863 | 0.601762  |
| MmugDNA.14976.1.S1_at  | CDH11            | 0.00267151 | 0.0952338 | -0.866994 |
| MmugDNA.6770.1.S1_at   | PNMAL1           | 0.00267321 | 0.0952338 | 0.608587  |
| MmugDNA.19039.1.S1_at  | TMPRSS3          | 0.00268288 | 0.0954687 | -0.599117 |
| MmugDNA.7137.1.S1_s_at | ACSM3            | 0.00271205 | 0.0962262 | 1.0884    |
| MmugDNA.41157.1.S1_at  | MGP              | 0.0027233  | 0.096393  | 0.833363  |
| MmugDNA.25181.1.S1_at  | HSD17B6          | 0.00273441 | 0.096393  | 0.816785  |
| MmuSTS.3567.1.S1_at    | CCL21            | 0.00274601 | 0.0964649 | -1.06647  |
| MmugDNA.28135.1.S1_at  | WNT2B            | 0.00275702 | 0.0966348 | -0.599146 |
| MmugDNA.11730.1.S1_at  | ---              | 0.00280316 | 0.0972579 | -1.11212  |
| MmugDNA.19988.1.S1_at  | SERPINA6         | 0.00280939 | 0.0972579 | -0.956013 |
| MmugDNA.9321.1.S1_at   | PCSK6            | 0.00281545 | 0.0972952 | -0.595245 |
| MmugDNA.28945.1.S1_at  | ---              | 0.0028207  | 0.0973332 | 0.649287  |
| MmugDNA.19373.1.S1_at  | ---              | 0.00286623 | 0.0979207 | -1.31611  |
| MmugDNA.31897.1.S1_at  | TXNIP            | 0.0029031  | 0.0980575 | 0.672476  |
| MmugDNA.1157.1.S1_at   | PERP             | 0.00295608 | 0.098607  | -0.708377 |
| MmugDNA.36836.1.S1_at  | NFASC            | 0.00295852 | 0.098607  | 0.890451  |
| MmugDNA.2684.1.S1_at   | LOC721007        | 0.00296006 | 0.098607  | -0.717798 |

|                       |              |       |            |           |           |
|-----------------------|--------------|-------|------------|-----------|-----------|
| MmuSTS.137.1.S1_at    |              | 5-Sep | 0.00296903 | 0.0987964 | -0.618629 |
| MmugDNA.37390.1.S1_at | CDCA3        |       | 0.00297295 | 0.0988452 | -0.716144 |
| MmugDNA.41450.1.S1_at | ---          |       | 0.00300727 | 0.0995762 | -0.901028 |
| MmugDNA.16895.1.S1_at | SPON2        |       | 0.00301138 | 0.0996306 | 0.837916  |
| MmuSTS.2641.1.S1_at   | LOC100429735 |       | 0.00302406 | 0.0996417 | 0.790549  |
| MmugDNA.34386.1.S1_at | OCIAD2       |       | 0.00303063 | 0.0996953 | 0.675868  |



**Supplemental Table 5.** List of differentially expressed (DE) proteins (proteomics analyses) in the luteal and follicular phases that were evaluated by Gene Set Enrichment Analysis (GSEA); the core enriched proteins are indicated; to examine the overlap between the gene and protein expression levels we created corresponding gene sets from the proteins that were found to be enriched in the two phases; we then used GSEA to see if those DE protein gene sets were enriched in either phase in the gene expression data. Gene expression is ranked from luteal to follicular and GSEA determines the distribution of the gene set within that ranking.

| <b>Follicular phase</b> |                    |                                                                                               |                       |
|-------------------------|--------------------|-----------------------------------------------------------------------------------------------|-----------------------|
| <b>Probesets</b>        | <b>Gene symbol</b> | <b>Gene titles</b>                                                                            | <b>Core Enriched?</b> |
| CFI                     | CFI                | complement factor I                                                                           | No                    |
| DMBT1                   | DMBT1              | deleted in malignant brain tumors 1                                                           | No                    |
| CFB                     | CFB                | complement factor B                                                                           | No                    |
| ITIH3                   | ITIH3              | inter-alpha (globulin) inhibitor H3                                                           | No                    |
| ALB                     | ALB                | albumin                                                                                       | No                    |
| VTN                     | VTN                | vitronectin                                                                                   | No                    |
| C4BPA                   | C4BPA              | complement component 4 binding protein, alpha                                                 | No                    |
| CFH                     | CFH                | complement factor H                                                                           | No                    |
| FGB                     | FGB                | fibrinogen beta chain                                                                         | No                    |
| APOA1                   | APOA1              | <b>apolipoprotein A-I</b>                                                                     | <b>Yes</b>            |
| S100A2                  | S100A2             | <b>S100 calcium binding protein A2</b>                                                        | <b>Yes</b>            |
| AHSG                    | AHSG               | <b>alpha-2-HS-glycoprotein</b>                                                                | <b>Yes</b>            |
| ITIH2                   | ITIH2              | <b>inter-alpha (globulin) inhibitor H2</b>                                                    | <b>Yes</b>            |
| FN1                     | FN1                | <b>fibronectin 1</b>                                                                          | <b>Yes</b>            |
| KNG1                    | KNG1               | <b>kininogen 1</b>                                                                            | <b>Yes</b>            |
| FGG                     | FGG                | <b>fibrinogen gamma chain</b>                                                                 | <b>Yes</b>            |
| APOD                    | APOD               | <b>apolipoprotein D</b>                                                                       | <b>Yes</b>            |
| FGA                     | FGA                | <b>fibrinogen alpha chain</b>                                                                 | <b>Yes</b>            |
| C9                      | C9                 | <b>complement component 9</b>                                                                 | <b>Yes</b>            |
| TXNDC17                 | null               | <b>null</b>                                                                                   | <b>Yes</b>            |
| F2                      | F2                 | <b>coagulation factor II (thrombin)</b>                                                       | <b>Yes</b>            |
| TAGLN2                  | TAGLN2             | <b>transgelin 2</b>                                                                           | <b>Yes</b>            |
| AMBP                    | AMBP               | <b>alpha-1-microglobulin/bikunin precursor</b>                                                | <b>Yes</b>            |
| <b>Luteal phase</b>     |                    |                                                                                               |                       |
| CPNE3                   | CPNE3              | <b>copine III</b>                                                                             | <b>Yes</b>            |
| COTL1                   | COTL1              | <b>coactosin-like 1 (Dictyostelium)</b>                                                       | <b>Yes</b>            |
| BASP1                   | BASP1              | <b>brain abundant, membrane attached signal protein 1</b>                                     | <b>Yes</b>            |
| ARHGDI3                 | ARHGDI3            | <b>Rho GDP dissociation inhibitor (GDI) beta</b>                                              | <b>Yes</b>            |
| CORO1A                  | CORO1A             | <b>coronin, actin binding protein, 1A</b>                                                     | <b>Yes</b>            |
| LCN2                    | LCN2               | <b>lipocalin 2 (oncogene 24p3)</b>                                                            | <b>Yes</b>            |
| MMP9                    | MMP9               | <b>matrix metalloproteinase 9 (gelatinase B, 92kDa gelatinase, 92kDa type IV collagenase)</b> | <b>Yes</b>            |
| MSN                     | MSN                | moesin                                                                                        | No                    |
| VIM                     | VIM                | vimentin                                                                                      | No                    |
| LCP1                    | LCP1               | lymphocyte cytosolic protein 1 (L-plastin)                                                    | No                    |
| HNRNPC                  | null               | null                                                                                          | No                    |
| CRISP3                  | CRISP3             | cysteine-rich secretory protein 3                                                             | No                    |
| S100A7                  | S100A7             | S100 calcium binding protein A7                                                               | No                    |
| KLK10                   | KLK10              | kallikrein 10                                                                                 | No                    |
| MMP8                    | MMP8               | matrix metalloproteinase 8 (neutrophil collagenase)                                           | No                    |
| LTF                     | LTF                | lactotransferrin                                                                              | No                    |
| SPRR1A                  | SPRR1A             | small proline-rich protein 1A                                                                 | No                    |
| PLBD1                   | null               | null                                                                                          | No                    |
| CTSG                    | CTSG               | cathepsin G                                                                                   | No                    |
| MPO                     | MPO                | myeloperoxidase                                                                               | No                    |
| GPI                     | GPI                | glucose phosphate isomerase                                                                   | No                    |
| KRT1                    | KRT1               | keratin 1 (epidermolytic hyperkeratosis)                                                      | No                    |
| KRT9                    | KRT9               | keratin 9 (epidermolytic palmoplantar keratoderma)                                            | No                    |
| ANXA3                   | ANXA3              | annexin A3                                                                                    | No                    |
